1 The transcription factor Xrp1 orchestrates both reduced translation and cell competition  
2 upon defective ribosome assembly or function

3

4 Marianthi Kiparaki<sup>1,4,5</sup>

5 Chaitali Khan<sup>1</sup>

6 Virginia Folgado Marco<sup>1</sup>

7 Jacky Chuen<sup>1</sup>

8 Nicholas E. Baker<sup>1,2,3,5</sup>

9

10 1. Department of Genetics

11 Albert Einstein College of Medicine

12 1300 Morris Park Avenue

13 Bronx

14 NY 10461

15 USA

16

17 2. Department of Developmental and Molecular Biology

18 Albert Einstein College of Medicine

19 1300 Morris Park Avenue

20 Bronx

21 NY 10461

22 USA

23

24 3. Department of Ophthalmology and Visual Sciences

25 Albert Einstein College of Medicine

26 1300 Morris Park Avenue

27 Bronx

28 NY 10461

29 USA

30

31 4. present address: Biomedical Sciences Research Center 'Alexander Fleming', 34  
32 Fleming Street, 16672, Vari, Greece.

33

34 5. Authors for correspondence: [Nicholas.baker@einsteinmed.org](mailto:Nicholas.baker@einsteinmed.org),  
35 kiparaki@fleming.gr.

36

37

38

39

40

41 ABSTRACT

42 Ribosomal Protein (*Rp*) gene haploinsufficiency affects overall translation rate,  
43 leads to cell elimination by competition with wild type cells in mosaic tissues, and  
44 sometimes leads to accumulation of protein aggregates. The changes in ribosomal  
45 subunit levels observed are not sufficient for these effects, which all depend on the AT-  
46 hook, bZip domain protein Xrp1. In *Rp*<sup>+/-</sup> cells, Xrp1 reduced global translation through  
47 PERK-dependent phosphorylation of eIF2 $\alpha$ . eIF2 $\alpha$  phosphorylation was sufficient to  
48 reduce translation in, and also enable cell competition of, otherwise wild type cells.  
49 Unexpectedly, however, many other defects reducing ribosome biogenesis or function  
50 (depletion of TAF1B, eIF2, eIF4G, eIF6, eEF2, eEF1 $\alpha$ 1, or eIF5A), also increased eIF2 $\alpha$   
51 phosphorylation and enabled cell competition. In all cases this was through the Xrp1  
52 expression that was induced, placing Xrp1 as the downstream instigator of cell  
53 competition that also contributed to overall translation deficits. In the absence of Xrp1,  
54 translation differences between cells were not themselves sufficient to trigger cell  
55 competition. Thus, Xrp1, which is shown here to be a sequence-specific transcription  
56 factor, is the master regulator that triggers cell competition and other consequences of  
57 multiple ribosomal stresses.

## 58 INTRODUCTION

59

60 It would be difficult to exaggerate the importance of ribosomes. Eukaryotic  
61 ribosomes comprise 4 rRNAs and 80 proteins combined into Large and Small subunits  
62 (LSU and SSU) that, together with multiple initiation and elongation factors, constitute  
63 the translational apparatus for protein synthesis(Jackson, Hellen, & Pestova, 2010;  
64 Thomson, Ferreira-Cerca, & Hurt, 2013). Ribosome biogenesis and the regulation of  
65 translation are important targets of cellular regulation, and defects affecting ribosomes  
66 and translation are implicated in many diseases, from neurodegeneration to  
67 cancer(Aspesi & Ellis, 2019; Hetman & Slomnicki, 2019)(Genuth & Barna, 2018; Ingolia,  
68 Hussmann, & Weissman, 2019; Joazeiro, 2019; Phillips & Miller, 2020). Mutations  
69 affecting rRNA synthesis, ribosomal protein genes (Rp genes), and some other  
70 ribosome biogenesis factors give rise to ribosomopathies, a family of translation-related  
71 diseases(Kampen, Sulima, Vereecke, & De Keersmaecker, 2020). The ribosomopathy  
72 Diamond Blackfan Anemia (DBA) most commonly results from heterozygosity for  
73 mutations in Rp genes, and is characterized by early onset anemia, cancer  
74 predisposition, and sometimes diminished growth and skeletal defects(Draptchinskaia  
75 et al., 1999; Choesmel et al., 2007; Danilova & Gazda, 2015; Da Costa, Narla, &  
76 Mohandas, 2018). Most ribosomal protein genes are haploinsufficient in *Drosophila*  
77 also, where their dominant 'Minute' phenotype was named by Bridges and Morgan on  
78 account of the small, thin cuticular bristles observed, in addition to developmental  
79 delay(Bridges & Morgan, 1923; Lambertsson, 1998; Marygold et al., 2007).

80 Rp gene loci were recently proposed to be important indicators of aneuploidy(Ji,  
81 Chuen, Kiparaki, & Baker, 2021). It was known that aneuploid cells can be selectively  
82 eliminated from embryonic and developing mammalian tissues, but the mechanisms  
83 responsible have been uncertain(Bolton et al., 2016; McCoy, 2017). In *Drosophila*, cells  
84 heterozygous for mutations in Rp genes are selectively eliminated from mosaic imaginal  
85 discs, where they are replaced by neighboring wild type cells(Morata & Ripoll, 1975;  
86 Simpson, 1979). This phenomenon, named 'cell competition', represents a process  
87 whereby cells that present differences from their neighbors can be eliminated from  
88 growing tissues, thought to enable the removal of cells that might be deleterious to the



89 tissue(Morata & Ripoll, 1975; Lawlor, Perez-Montero, Lima, & Rodriguez, 2019; Baker,  
90 2020; Vishwakarma & Piddini, 2020; Marques-Reis & Moreno, 2021; Morata, 2021).  
91 Because *Rp* gene dose is likely to be affected whenever one or more chromosomes or  
92 substantial chromosome regions are monosomic, cell competition could help eliminate  
93 aneuploid cells on the basis of altered *Rp* gene dose(McNamee & Brodsky, 2009). This  
94 mechanism was recently demonstrated to occur in *Drosophila* imaginal discs(Ji et al.,  
95 2021). Such a role of cell competition is potentially significant for tumor surveillance,  
96 since tumors almost always consist of aneuploid cells, and for healthy aging, since  
97 aneuploid cells accumulate during aging(Hanahan & Weinberg, 2011; Lopez-Otin,  
98 Blasco, Partridge, Serrano, & Kroemer, 2013). In addition to their mutation in DBA, this  
99 provides another reason why it is important to understand the cellular effects of *Rp*  
100 mutations, and how they lead to cell competition.

101 Unsurprisingly, *Rp* mutant heterozygosity generally leads to reduced  
102 translation(Boring, Sinervo, & Schubiger, 1989; Oliver, Saunders, Tarle, & Glaser,  
103 2004). It might be expected that a 50% reduction in ribosome subunit biogenesis would  
104 be responsible, but remarkably, in *Drosophila* this and many other features of *Rp*  
105 haploinsufficiency, including cell competition in the presence of wild type cells, depend  
106 on a bZip, AT-hook putative transcription factor encoded by the *Xrp1* gene(Lee et al.,  
107 2018). *Xrp1* is responsible for >80% of the transcriptional changes that are seen in  
108 *Rp*<sup>+/-</sup> wing imaginal discs(Lee et al., 2018). Thus, reduced translation, which is a  
109 feature of *Rp* haploinsufficiency from yeast to mice and humans, may have a  
110 transcriptional basis(Lee et al., 2018). Accordingly, we could detect only modest  
111 reductions in SSU concentration in heterozygous *RpS3*, *RpS17* or *RpS18* mutants,  
112 although *RpL27A* haploinsufficiency reduced steady state LSU numbers by ~30% (Lee  
113 et al., 2018). Some of these findings now have support from yeast studies, where  
114 deletion of single *Rp* loci present in paralogous pairs (a recent genome duplication has  
115 left yeast with many such *Rp* gene pairs) potentially mimics heterozygosity for a single  
116 copy gene in diploid organisms. The large majority of translational changes described  
117 by ribosome profiling of such pseudo-heterozygotes turned out to reflect changes in  
118 mRNA abundance, implicating a predominantly transcriptional response to *Rp*  
119 mutations in yeast also(Cheng et al., 2019). Mass spectrometry and rRNA

120 measurements of the yeast strains further suggested that ribosome numbers were little  
121 affected in most *RpL* gene deletion strains, whereas some *RpS* deletions increased  
122 LSU concentrations by up to 1.5x(Cheng et al., 2019).

123 These findings raise many mechanistic questions. How does *Rp*  
124 haploinsufficiency activate *Xrp1* gene expression? How does this putative transcription  
125 factor control overall translation, if not through altered ribosome numbers? Are  
126 differences in translation rate between cells the cause of cell competition, or is cell  
127 competition due to other consequences of *Xrp1* activity?

128 Alternative views of the *Rp* mutant phenotype have also been presented. Aside  
129 from the idea that reduced ribosome levels alter translation directly and are  
130 predominantly responsible for human DBA(Mills & Green, 2017; Khajuria et al., 2018),  
131 two recent studies propose that degradation of excess orphan *Rp* suppresses  
132 proteasome and autophagic flux in *Drosophila Rp* mutants, leading to protein  
133 aggregation and proteotoxic stress. They propose that proteotoxic stress suppresses  
134 translation, and renders *Rp*<sup>+/-</sup> cells subject to competition with wild type cells through a  
135 further oxidative stress response(Baumgartner, Dinan, Langton, Kucinski, & Piddini,  
136 2021; Recasens-Alvarez et al., 2021). This view does not propose any role for the *Xrp1*  
137 protein, or for transcriptional regulation of translation or cell competition. In addition, in  
138 concluding that autophagy is protective for *Rp* mutant cells (Baumgartner et al., 2021;  
139 Recasens-Alvarez et al., 2021), these studies contradict previous conclusions that  
140 autophagy is only increased in *Rp* mutant cells next to wild type cells, where it promotes  
141 cell death(Nagata, Nakamura, Sanaki, & Igaki, 2019).

142 Here we further investigate the basis of the *Rp* mutant phenotype in *Drosophila*.  
143 The results reaffirm the central role of *Xrp1* in multiple aspects of the *Rp* mutant  
144 phenotype. We confirm the modest effects of *Rp* haploinsufficiency on numbers of  
145 mature ribosome subunits, and show directly that ribosome precursors accumulate in  
146 *Rp* mutants. We find that translation is reduced in *Rp* mutant cells through eIF2 $\alpha$   
147 phosphorylation, but both this and the protein aggregation observed (which appears  
148 specific for mutations affecting SSU proteins) require *Xrp1* and so are not direct post-  
149 transcriptional consequences of ribosome assembly defects. We report that interfering  
150 with translation, whether through eIF2 $\alpha$  phosphorylation or by multiple other routes

151 disrupting ribosome assembly or function, can subject otherwise wild type cells to  
152 competition with normal cells. This is not because translation differences between cells  
153 cause cell competition directly, however, but because defects in both ribosome  
154 biogenesis and function that affect translation are all found to activate Xrp1, which then  
155 mediates the cell competition engendered by these translational stresses. Without  
156 Xrp1, translation differences are insufficient for cell competition. We then show that  
157 Xrp1 is a sequence-specific transcription factor that is required for cell competition in  
158 response to multiple triggers and is responsible for multiple aspects of the *Rp* mutant  
159 phenotype, potentially including transcription that has previously been taken as  
160 reporters of oxidative stress. Altogether, these studies clarify discrepancies in  
161 previously published work, and refocus attention on transcriptional responses to  
162 ribosome and translation defects mediated by Xrp1, with implications for the  
163 mechanisms and therapy of multiple ribosomopathies, and for the surveillance of  
164 aneuploid cells.

165

## 166 RESULTS

167

### 168 **Ribosome levels in *Rp*<sup>+/-</sup> cells**

169 Abnormal cellular levels of ribosome subunits are proposed to affect translation  
170 in ribosomopathies (Mills & Green, 2017). Multiple models of DBA accordingly seek to  
171 reduce steady-state *Rp* concentration to 50% of normal (Heijnen et al., 2014; Khajuria et  
172 al., 2018). By measuring *Drosophila* rRNA levels in northern blots, however, we had  
173 previously concluded that whereas cellular levels of ribosome subunits were affected in  
174 heterozygotes for an *RpL27A* mutant, multiple *Rp* mutations affecting SSU proteins led  
175 only to ~10% reduction in SSU levels that was not statistically significant (Lee et al.,  
176 2018). A caveat to this conclusion was the use of tubulin mRNA and actin mRNA as  
177 loading controls. While mRNA-seq shows that the proportions of actin and tubulin  
178 mRNAs are not much affected in *Rp*<sup>+/-</sup> genotypes (Kucinski, Dinan, Kolahgar, & Piddini,  
179 2017; Lee et al., 2018), it could be that total mRNA amounts are altered by *Rp*  
180 mutations, which would affect the conclusions regarding rRNA. In bacteria, it is well-  
181 established that ribosomes protect mRNA from turnover, so that reduced ribosome

182 numbers reduce overall mRNA levels as well(Yarchuk, Jacques, Guillerez, & Dreyfus,  
183 1992; Hui, Foley, & Belasco, 2014). The situation in eukaryotic cells may not be the  
184 same as in bacteria(Belasco, 2010). Still, we decided to measure rRNA levels again  
185 using a non-coding RNA as loading control. We chose the 7SL RNA component of  
186 Signal Recognition Particle, an abundant non-coding RNA that is expressed in all cells.

187 Changes in LSU and SSU levels inferred from 5.8S and 18S rRNA abundance,  
188 normalized to 7SL RNA levels, are shown in Figure 1, and a representative northern  
189 blot in Figure 1A. Similar to what was observed previously, *Xrp1* mutations had no  
190 effect on apparent LSU or SSU levels in the wild type or in heterozygotes for any of four  
191 mutant loci, *RpS18*, *RpS3*, *RpL27A*, and *RpL14*, reaffirming that *Xrp1* is unlikely to  
192 affect translation rate through an effect on ribosome subunit concentrations (Figure  
193 1B,C). Accordingly, *Xrp1*<sup>+/+</sup> and *Xrp1*<sup>+/-</sup> data were combined together to compare the  
194 effects of *Rp* mutations. We confirmed that LSU numbers were reduced in the *RpL27A*  
195 mutant, and extended this observation to mutation in a second RpL gene, *RpL14*  
196 (Figure 1D). Unlike our previous study, SSU levels were reduced 20-30% in *RpS18*,  
197 *RpS3* and *RpL14* mutants when normalized to the non-coding 7SL RNA, and these  
198 reductions were significantly different from the control (Figure 1E). By contrast, *RpL27A*  
199 did not change SSU numbers (Figure 1E).

200 To confirm these findings using an independent method, we performed tissue  
201 staining with a monoclonal antibody, mAbY10B, that recognizes rRNA, and particularly  
202 a structure in the 5.8S rRNA that is part of the LSU(Lerner, Lerner, Janeway, & Steitz,  
203 1981). Consistent with Northern analysis, immunostaining of mosaic wing imaginal  
204 discs confirmed lower 5.8S rRNA levels in *Rp27A*<sup>+/-</sup> cells compared to *Rp27A*<sup>+/+</sup> cells in  
205 the same wing discs (Figure 1F, Figure 1- figure supplement 1A). By contrast, no  
206 reduction in mAbY10B staining was observed in cell mutated for either of two SSU  
207 components, *RpS3* or *RpS17*, consistent with the northern blot measurements of 5.8S  
208 rRNA levels (Figure 1G, Figure 1- figure supplement 1B-D).

209 To gain further support for these findings, we compared Rp protein levels by  
210 immunostaining mutant and control cells in the same imaginal discs. We used  
211 antibodies against RpL9 and RpL10Ab as markers for LSU, and against RpS12 and  
212 RACK1 as markers for SSU. *RpL27A* mutant cells contained lower levels of LSU

213 protein, and slightly lower levels of SSU protein(Figure 1H, Figure 1-figure supplement  
214 2A). . *RpS3*, *RpS17*, and *RpS18* mutant cells contained lower levels of the SSU  
215 protein, and *RpS18* slightly higher levels of the LSU protein RpL10Ab, even in the *Xrp1*  
216 mutant background (Figure 1I, Figure 1-figure supplement 2B, C-F). These tissue  
217 stainings qualitatively support the conclusion that levels of SSU components are  
218 generally reduced in *RpS<sup>+/-</sup>* cells and *RpL27A<sup>+/-</sup>* cells, whereas LSU levels are only  
219 reduced in *RpL27A<sup>+/-</sup>* cells, in comparison to wild type cells within the same  
220 preparation, and that these changes are modest and unaffected by *Xrp1*, even though  
221 *Xrp1* mutation restores normal global translation rate(Lee et al., 2018).

222

### 223 **Ribosome precursors accumulate in *Rp<sup>+/-</sup>* cells**

224 An additional, or alternative, potential effect of *Rp* mutations is the accumulation  
225 of unused ribosome precursors and assembly intermediates. In yeast, depleting almost  
226 any *Rp* arrests ribosome biogenesis at some stage, reflecting individual requirements  
227 for ribosome assembly(Ferreira-Cerca, Poll, Gleizes, Tschochner, & Milkereit, 2005;  
228 Poll et al., 2009) (Ferreira-Cerca et al., 2005; Ferreira-Cerca et al., 2007; Woolford &  
229 Baserga, 2013; Henras, Plisson-Chastang, O'Donohue, Chakraborty, & Gleizes, 2015).  
230 *Rp* haploinsufficiency might delay biogenesis at these same steps, perhaps leading to  
231 accumulation of particular precursor states. To assess ribosome biogenesis in *Rp<sup>+/-</sup>*  
232 mutants, intermediates were quantified by Northern blotting using probes specific for  
233 sequences that are excised from the rRNA as the ribosome assemble and mature. In  
234 *Drosophila*, two parallel pathways A and B excise ITS1, ITS2, and the N-terminal EXT  
235 sequences, and process the resulting rRNAs, until the mature 28S (processed into  
236 28Sa and 28Sb in *Drosophila*), 18S and 5.8S rRNAs are produced by the end of  
237 ribosome biogenesis (Figure 2A)(Long & Dawid, 1980). We used specific probes to  
238 identify rRNA intermediates on northern blots (Figure 2A-D; Figure 2 Supplement 1). As  
239 predicted, intermediates accumulated in each of the *Rp<sup>+/-</sup>* genotypes (see Figure 2  
240 legend for details). These findings support the idea that *Rp* gene haploinsufficiency  
241 leads to ribosome biogenesis delays, and corresponding accumulation of assembly  
242 intermediates.

243 In no case did *Xrp1* mutation eliminate the accumulation of intermediates in *Rp*  
244 mutant genotypes (Figure 2B-D; Figure 2 Supplement 1). There were some changes  
245 noted in the intermediates that accumulated, however. For example, in *RpS17<sup>+/-</sup>* and  
246 *RpS13<sup>+/-</sup>* it seems that more band f accumulates when *Xrp1* is mutated, and less band  
247 a. Levels of the pre-rRNA also increase when *Xrp1* is mutated, which can be an  
248 indication of elevated rRNA transcription(Sollner-Webb & Tower, 1986), consistent with  
249 the faster growth and cell division of *Rp<sup>+/-</sup> Xrp<sup>+/-</sup>* genotypes than *Rp<sup>+/-</sup>* genotypes(Lee et  
250 al., 2018).

251 In mammalian cells with *Rp* haploinsufficiency, unincorporated 5S RNP,  
252 comprising RpL5, RpL11 and the 5S rRNA, activates the transcription factor and tumor  
253 suppressor p53 by inhibiting the p53 ubiquitin ligase DM2(Pelava, Schneider, &  
254 Watkins, 2016). P53 is responsible for at least some consequences of *Rp*  
255 haploinsufficiency in mice, perhaps even including the reduction in translation(Tiu et al.,  
256 2020). P53 is also implicated in cell competition in mammals, although not in  
257 *Drosophila*, where *Xrp1* may acquire some of its functions(Kale, Li, Lee, & Baker, 2015;  
258 Baker, Kiparaki, & Khan, 2019). In *Drosophila* it seems that RpS12 is particularly critical  
259 for activating *Xrp1*, through an unknown mechanism(Kale et al., 2018; Boulan,  
260 Andersen, Colombani, Boone, & Leopold, 2019; Ji et al., 2019). If a ribosome  
261 biogenesis intermediate, for example including RpS12, induced *Xrp1* expression, then  
262 we predicted that its accumulation and signaling could be prevented by restricting rRNA  
263 biogenesis. To test this model, we reduced rRNA synthesis by knockdown of TAF1B,  
264 an accessory factor for RNA polymerase I(Knutson & Hahn, 2011). We predicted that  
265 *Xrp1* expression would be reduced when TAF1B was knocked down in an *Rp<sup>+/-</sup>*  
266 background, and that the knockdown cells would be more competitive than their *Rp<sup>+/-</sup>*  
267 neighbors. Contrary to these predictions, *Xrp1* expression was actually higher in  
268 *RpS17<sup>+/-</sup> dsRNA<sup>TAF1B</sup>* cells than *RpS17<sup>+/-</sup>* cells(Figure 2E), and *RpS17<sup>+/-</sup> dsRNA<sup>TAF1B</sup>*  
269 cells underwent cell death at boundaries with *RpS17<sup>+/-</sup>* territories, suggesting they were  
270 less competitive, not more so (Figure 2F). To understand this result, the effect of  
271 TAF1B knockdown in otherwise wild type cells was examined, and found to resemble  
272 that of *RpS17<sup>+/-</sup> dsRNA<sup>TAF1B</sup>* cells. That is, *dsRNA<sup>TAF1B</sup>* cells strongly activated *Xrp1*  
273 expression, and underwent apoptosis at interfaces with wild type cells (Figure 2G,H).



274 This boundary cell death was Xrp1-dependent (Figure 2I,J). Thus, far from rRNA being  
275 required for Xrp1 expression and cell competition, as expected if an RNP containing  
276 RpS12 activates Xrp1, rRNA depletion appeared to have similar effects to Rp depletion.

277 It has been suggested that Xrp1 might be released from the nucleolus following  
278 nucleolar disruption(Baillon, Germani, Rockel, Hilchenbach, & Basler, 2018). We were  
279 unable to detect either resident Xrp1 protein in wild type nucleoli,or altered nucleolar  
280 structure in RpS17<sup>+/-</sup> or RpS18<sup>+/-</sup> cells mutants by anti-fibrillar staining (Figure 2- figure  
281 supplement 2). It is important to compare Rp<sup>+/-</sup> and wild type cells at a level where  
282 nuclei are present in both, since in mosaic wing discs Rp<sup>+/-</sup> nuclei can be displaced  
283 basally compared to wild type cells (eg Figure 1- figure supplement 1C,D).

284

### 285 **Reduced protein synthesis is due to PERK-dependent eIF2 $\alpha$ phosphorylation in** 286 **Rp<sup>+/-</sup> cells**

287 Rp mutations may lead to surplus unused Rp. In yeast, aggregation of unused  
288 Rp rapidly affects specific transcription factors, leading to a stress response(Albert et  
289 al., 2019; Tye et al., 2019). To explore how Xrp1 reduces translation, if not through  
290 reduced ribosome levels, we investigated the phosphorylation of eIF2 $\alpha$ , a key  
291 mechanism of global regulation of CAP-dependent translation that responds to  
292 proteotoxic stress (Hinnebusch & Lorsch, 2012). Strikingly, phosphorylation of eIF2 $\alpha$   
293 was increased in a cell-autonomous manner in Rp<sup>+/-</sup> cells compared to Rp<sup>+/+</sup> cells  
294 (RpS3, RpS17, RpS18 and RpL27A were examined) (Figure 3A,B; Figure 3- figure  
295 supplement 1A,B). Normal p-eIF2 $\alpha$  levels were restored when even one copy of the  
296 Xrp1 gene was mutated, as expected for the Xrp1-dependent process that reduces  
297 translation in Rp<sup>+/-</sup> cells (Figure 3- figure supplement 1C-E). To verify that eIF2 $\alpha$   
298 regulation by Xrp1 was cell-autonomous, we used clonal knockdown with an Xrp1  
299 dsRNA previously shown to restore normal growth to Rp<sup>+/-</sup> cells(Blanco, Cooper, &  
300 Baker, 2020). As predicted, Xrp1 knockdown decreased eIF2 $\alpha$  phosphorylation and  
301 increased translation rate in a cell-autonomous way (Figure 3E,F), as did knocking-  
302 down the gene encoding the Xrp1 heterodimer partner, Irbp18 (Francis et al., 2016;  
303 Blanco et al., 2020) (Figure 3- figure supplement 1F, G).

304 If eIF2 $\alpha$  phosphorylation is how Xrp1 reduces translation in  $Rp^{+/-}$  cells, we  
305 expected translation to be restored by overexpressed PPP1R15, the *Drosophila* protein  
306 homologous to the mammalian p-eIF2 $\alpha$  phosphatases, Gadd34 (PPP1R15a) and CReP  
307 (PPP1R15b) (Harding et al., 2009; Malzer et al., 2013). Indeed, PPP1R15 cell-  
308 autonomously reduced p-eIF2 $\alpha$  levels and cell-autonomously restored overall  
309 translation levels in multiple  $Rp$  genotypes, as measured using the click reagent *o*-  
310 propargyl puromycin (OPP) (Figures 3E,F; Figure 3- figure supplement 1H,I). These  
311 data indicate that it is eIF2 $\alpha$  phosphorylation that suppresses translation in  $Rp^{+/-}$  cells.

312 *Drosophila* contains two potential eIF2 $\alpha$  kinases that are thought to respond to  
313 particular stresses and not to be activated in unstressed epithelial wing disc cells.  
314 When protein kinase R-like endoplasmic reticulum (ER) kinase (PERK), a kinase that  
315 phosphorylates eIF2 $\alpha$  during the unfolded protein response (Shi et al., 1998; Harding,  
316 Zhang, & Ron, 1999; Harding, Zhang, Bertolotti, Zeng, & Ron, 2000; Pakos-Zebrucka et  
317 al., 2016), was depleted using RNAi, p-eIF2 $\alpha$  levels were unaffected in wild type wing  
318 discs (Figure 3G). By contrast, in the  $Rp^{+/-}$  genotypes the levels of p-eIF2 $\alpha$  were  
319 reduced by PERK depletion (Figure 3H; Figure 3- figure supplement 1J,K). Thus,  
320 PERK activity was higher in  $Rp^{+/-}$  cells and responsible for eIF2 $\alpha$  phosphorylation there.  
321 Consistently, PERK knock-down cell-autonomously restored normal translation levels in  
322 multiple  $Rp^{+/-}$  genotypes (Figure 3 I; Figure 3- figure supplement 1L). Depletion of the  
323 other eIF2 $\alpha$  kinase known in *Drosophila*, Gcn2, did not decrease p-eIF2 $\alpha$  levels in  $Rp^{+/-}$   
324 wing disc cells (Figure 3J).

325

### 326 **Xrp1 increases protein aggregation and modified UPR gene expression**

327 Recently, protein aggregates have been detected in the cytoplasm of wing disc  
328 cells heterozygous for  $RpS3$ ,  $RpS23$ , and  $RpS26$  mutants as foci of ubiquitin or p62  
329 accumulation, reflecting decreased proteasome activity and autophagy (Baumgartner et  
330 al., 2021; Recasens-Alvarez et al., 2021). We confirmed the greater accumulation of  
331 aggregates in  $RpS3^{+/-}$  and  $RpS18^{+/-}$  cells compared to wild type cells but did not see  
332 this for  $RpL27A^{+/-}$  cells (Figure 4A-C). Significantly, another study saw no general  
333 increase in autophagy in  $RpL14^{+/-}$  wing discs (Nagata et al., 2019), suggesting this may  
334 not occur in mutants affecting the LSU. Importantly, aggregates in  $RpS3^{+/-}$  and  $RpS18^{+/-}$



335 wing discs were Xrp1-dependent, placing them downstream of Xrp1 activation (Figure  
336 4D-E).

337 PERK is a transmembrane protein with a cytoplasmic kinase domain that is a  
338 sensor of unfolded proteins within the ER, not within the cytoplasmic or  
339 nucleolus(Bertolotti, Zhang, Hendershot, Harding, & Ron, 2000; Harding et al., 2000;  
340 Ron & Walter, 2007; Walter & Ron, 2011). Cytoplasmic aggregates can cause unfolded  
341 protein accumulation within the ER by competing for proteasomes, however. ER stress  
342 also activates Ire-1 and Atf6 in parallel to PERK(Bertolotti et al., 2000; Ron & Walter,  
343 2007; Walter & Ron, 2011; Hetz, 2012; Mitra & Ryoo, 2019). Xbp1-GFP (Sone, Zeng,  
344 Larese, & Ryoo, 2013; Mitra & Ryoo, 2019), a reporter for Ire-1 activity, was only  
345 inconsistently activated in *Rp<sup>+/-</sup>* wing discs (Figure 4 Figure supplement 1), in agreement  
346 with the absence of any transcriptional signature of Atf6 or Xbp1 activation in *Rp/+* wing  
347 disc mRNA-seq data(Lee et al., 2018). PERK mRNA levels were elevated by 1.4x in  
348 both *RpS3<sup>+/-</sup>* and *RpS17<sup>+/-</sup>* wing discs, however (Figure 4F). This increase was  
349 statistically very significant, replicated in another group's data, and entirely dependent  
350 on *Xrp1* (Figure 4F)(Kucinski et al., 2017; Lee et al., 2018). *BiP* and 10 other UPR  
351 genes were affected differently. Although none were significantly altered in *RpS17<sup>+/-</sup>* or  
352 *RpS3<sup>+/-</sup>* discs, all these genes were affected in *RpS3<sup>+/-</sup> Xrp1<sup>+/-</sup>* wing discs, suggesting  
353 that Xrp1 prevents their elevation in *RpS17<sup>+/-</sup>* or *RpS3<sup>+/-</sup>* discs (Figure 4G). Since these  
354 genes help restore ER proteostasis (Walter & Ron, 2011), we speculate that Xrp1 might  
355 sensitize *Rp<sup>+/-</sup>* cells to PERK activation relative to Atf6 or Xbp1 branches of the UPR(Lin  
356 et al., 2007), by elevating the expression of PERK while blunting the usual proteostatic  
357 respons. Testing this notion would require manipulating multiple genes in vivo  
358 simultaneously.

359

### 360 **eIF2 $\alpha$ phosphorylation is sufficient to induce competitive apoptosis, but through** 361 **Xrp1**

362 We determined whether manipulating p-eIF2 $\alpha$  levels alone was sufficient to  
363 cause competition of otherwise wild type cells. Consistent with this notion, clones of  
364 cells depleted for PPP1R15 were rapidly lost from wing imaginal discs and could rarely  
365 be recovered (Figure 5A,B). Under some conditions (longer heat shock) where clones of

366 cells depleted for PPP1R15 survived temporarily, we verified that p-eIF2 $\alpha$  was  
367 increased and translation reduced compared to nearby wild type cells (Figure 5C,D;  
368 Figure 5- figure supplement 1A,B). Such surviving clones were characterized by  
369 apoptosis of PPP1R15-depleted cells predominantly at the interface with wild type cells,  
370 a sign of cell competition (Figure 5E; Figure 5 figure supplement 1C).

371 If eIF2 $\alpha$  phosphorylation was the downstream effector of Xrp1 that triggers cell  
372 competition in *Rp*<sup>+/-</sup> cells, then PPP1R15 depletion should eliminate cells independently  
373 of Xrp1. Like *Rp*<sup>+/-</sup> cells, however, PPP1R15-depleted cells showed strong upregulation  
374 of Xrp1 protein (Figure 5F,G; Figure 5 figure supplement 1D). When Xrp1 was  
375 knocked-down in PPP1R15-depleted cells, competitive cell death was completely  
376 blocked and clone survival improved (Figure H-I; Figure 5- figure supplement 1E-F).  
377 Even the p-eIF2 $\alpha$  levels in the PPP1R15 depleted clones partially depended on Xrp  
378 (compare Figure 5C with Figure 5J), and translation rates were similar to wild type  
379 levels in PPP1R15 clones lacking Xrp1 (Figure 5K). Interestingly, PPP1R15 knock-  
380 down reduced bristle size, another similarity with *Rp* mutants (Figure 5-figure  
381 supplement 1G).

382 The above data show that eIF2 $\alpha$  phosphorylation was sufficient to reduce cell  
383 competitiveness in otherwise wild type cells, but only in the presence of Xrp1. It was  
384 the mechanism whereby Xrp1 reduced global translation rate in *Rp*<sup>+/-</sup> mutant cells, but  
385 was not the downstream effector of Xrp1 for cell competition.

386

### 387 **Interrupting the translation cycle activates Xrp1-dependent cell competition,** 388 **independently of diminished translation**

389 Phosphorylation of eIF2 $\alpha$  inhibits CAP-dependent initiation. To explore further  
390 whether reduced translation was sufficient to cause cell competition, we also reduced  
391 translation by clonal depletion of translation factors acting (Jackson et al., 2010) at a  
392 variety of steps in the translation cycle, not only at initiation but also the 40S-60S  
393 subunit joining and elongation steps. Specifically, we depleted eIF4G, eIF5A, eIF6,  
394 eEF1 $\alpha$ 1, and eEF2. eIF4G is part of the eIF4F complex which binds the mRNA 5'cap  
395 and recruits SSU to enable translation initiation (Jackson et al., 2010). It is now  
396 accepted that eIF5A functions in translation elongation and termination (Saini, Eyler,

397 Green, & Dever, 2009; Schuller, Wu, Dever, Buskirk, & Green, 2017). eEF1 $\alpha$ 1 delivers  
398 aminoacyl-tRNAs to the ribosome and eEF2 also promotes ribosome  
399 translocation(Dever & Green, 2012). eIF6 has a role during LSU biogenesis and also in  
400 translation initiation(Brina, Miluzio, Ricciardi, & Biffo, 2015).

401 All these depletions exhibited severe reduction in translation rate in the third  
402 instar larvae, as did TAF1B depletion (Figure 6A, E,I,M; Figure 6- figure supplement 1  
403 A,E ; the fact that clones of cells expressing these dsRNAs could be recovered with  
404 such low translation suggests that translation factor depletion probably exacerbates  
405 over time, initially being insufficient to prevent translation and growth, but eventually  
406 becoming severe). Importantly, all of these translation factor depletions resulted in  
407 dramatic induction of apoptosis in depleted cells that were close to wild type cells,  
408 suggesting that differences in translation rate might be sufficient to initiate cell  
409 competition (Figure 6B,F,J; Figure 6- figure supplement 1 B,F). Interestingly, in all  
410 these cases translation increased in wild type cells near to the affected clones,  
411 something that was rare adjacent to *Rp*<sup>+/-</sup> cells and not seen adjacent to cells depleted  
412 for PPP1R15, although it was observed near to TAF1B depleted cells (Figure 6A,E,I,M;  
413 Figure 6- figure supplement 1 A,E). Phosphorylated RpS6 accumulated in wild type  
414 cells adjacent to TAF1B depleted cells, suggesting that a non-autonomous activation of  
415 Tor accounts for the increased translation in cells nearby those with translation deficits  
416 (Figure 6N)(Laplante & Sabatini, 2012; Romero-Pozuelo, Demetriades, Schroeder, &  
417 Teleman, 2017).

418 To confirm that translation factor depletion affected translation directly, and  
419 downstream of Xrp1 and PERK, Xrp1 expression and eIF2 $\alpha$  phosphorylation were  
420 examined. Unexpectedly, depletion for translation factors was associated with both cell-  
421 autonomous induction of Xrp1 expression and eIF2 $\alpha$  phosphorylation (Figure  
422 6C,D,G,H,K,L; Figure 6 Figure Supplement 1C,D,G,H; Figure 6- figure supplement 2).  
423 The levels were at least comparable to those of TAF1B-depleted cells (Figure 6I,J).  
424 When Xrp1 was knocked-down, PPP1R15 overexpressed, or PERK depleted  
425 simultaneously with translation factor depletion, the translation factor depletions  
426 behaved similarly to one another. PPP1R15 overexpression was sufficient to reduce  
427 eIF2 $\alpha$  phosphorylation to near or even below control levels (Figure 7A,D,G), but this did

428 not restore normal translation rates (Figure 7B,E,H). There was no rescue of  
429 competitive cell death (Figure 7C,F,I; Figure 7- figure supplement 1A,C) or Xrp1  
430 expression (Figure 7J-L; Figure 7- figure supplement 1 B,D). PERK knock-down  
431 similarly did not affect Xrp1 expression or rescue competitive cell death in translation-  
432 factor knock-downs (Figure 7 – figure supplement 2). Knockdown of Xrp1 reduced  
433 levels of eIF2 $\alpha$  phosphorylation in some cases (Figure 7M,P Figure 7- figure  
434 supplement 1E), although for eIF5A and eEF1 $\alpha$ 1 the reduction was only partial so that  
435 both the eIF5A Xrp1 depleted and eEF1 $\alpha$ 1 Xrp1 depleted cells retained more eIF2 $\alpha$   
436 phosphorylation than wild type cells(Figure 7S ;Figure 7- figure supplement 1E). For all  
437 the translation factors, however, Xrp1 depletion eliminated cell death at the competing  
438 cell boundaries, irrespective of whether eIF2 $\alpha$  phosphorylation remained (Figure  
439 7O,R,U; Figure 7- figure supplement 1G,J). We also found that overall translation rate,  
440 as estimated by OPP incorporation, was only partially restored by simultaneous Xrp1  
441 depletion from most translation factor knock-down cells, and remained lower than wild  
442 type cells (Figure 7N,Q; Figure 7- figure supplement 1C 7B,E, Figure 7- figure  
443 supplement 1F). Two exceptions were eIF6 and eEF1 $\alpha$ 1. Remarkably, simultaneous  
444 knock-down of Xrp1 along with either of these genes resulted in translation rates similar  
445 to or higher than in wild type cells (Figure 7T; Figure 7- figure supplement E).

446 These results unexpectedly show that translation factor depletion triggers similar  
447 effects to depletion of ribosome components, in which Xrp1 expression leads to eIF2 $\alpha$   
448 phosphorylation and to cell competition. The results separate eIF2 $\alpha$  phosphorylation  
449 from cell competition, however, because Xrp1-dependent cell competition continued  
450 even when eIF2 $\alpha$  phosphorylation levels was restored to normal by PPP1R15  
451 overexpression, and because remaining eIF2 $\alpha$  phosphorylation in eIF5A Xrp1-depleted  
452 and eEF1 $\alpha$ 1 Xrp1-depleted cells did not lead to cell competition. The results also  
453 separate cell competition from differences in translation levels, because no competitive  
454 cell death was observed in eIF4G Xrp1-depleted, eIF5A Xrp1-depleted, and eEF2 Xrp1-  
455 depleted cells, even though their translation was lower than the nearby wild type cells.  
456 Indeed, depletion for eIF6 or eEF1 $\alpha$ 1 induced Xrp1 and cell competition, even though  
457 without Xrp1 these cells seemed to translate at similar or higher rates to their neighbors.

458 These results focus attention on Xrp1 as the key effector of cell competition, irrespective  
459 of eIF2 $\alpha$  phosphorylation and overall translation rate.

460 These results also raise the question of whether *Rp* haploinsufficiency, rRNA  
461 depletion, eIF2 $\alpha$  phosphorylation, and translation factor depletion all activate Xrp1  
462 through a common pathway. In *Rp*<sup>+/-</sup>, Xrp1 expression genotypes depends on a specific  
463 ribosomal protein, RpS12, and is almost completely prevented by *rpS12*<sup>G97D</sup>, a mis-  
464 sense allele that specifically affects this aspect of RpS12 function(Lee et al., 2018; Ji et  
465 al., 2019). We found that *rpS12*<sup>G97D</sup> homozygosity also reduced Xrp1 induction when  
466 TAF1B was depleted (Figure 8A-C), but had much less effect when eEF2 was depleted  
467 (Figure 8D-E). Thus, the mechanism of Xrp1 activation may resemble that in *Rp*<sup>+/-</sup> cells  
468 when rRNA synthesis is affected, but appears distinct when translation factors are  
469 inhibited.

470

### 471 **Xrp1 is a transcription factor that regulates cell competition**

472 Xrp1 as a key mediator of multiple defects in ribosome biogenesis or function.  
473 Xrp1 is a sequence-specific DNA-binding protein implicated in genome maintenance,  
474 and binds directly to sequences of the P element whose transposition it  
475 promotes(Akdemir, Christich, Sogame, Chapo, & Abrams, 2007; Francis et al., 2016).  
476 Xrp1 also controls expression of many genes at the mRNA level(Lee et al., 2018), and  
477 other similar bZip proteins are transcription factors(Tsukada, Yoshida, Kominato, &  
478 Auron, 2011).

479 To test whether Xrp1 is a transcription factor, we used a dual-luciferase reporter  
480 system in transfected S2 cells (Figure 9A-D; Figure 9 Supplement 1). Luciferase  
481 reporter plasmids were either based on the widely-used core promoter of the *Drosophila*  
482 *hsp70* gene, or on a 400bp genomic sequence spanning the transcription start site of  
483 the *Xrp1* gene itself (Figure 9- figure supplement 2). We cloned 8x repeats of either of  
484 two different matches to the 10bp Xrp1/Irbp18 consensus binding site in vitro(Zhu et al.,  
485 2011), which is similar to that recently deduced from ChIP-Seq following Xrp1  
486 overexpression in vivo(Baillon et al., 2018) (Target 1 and Target 3) or of the sequence  
487 footprinted by Xrp1/Irbp18 on the P element terminal repeat (Francis et al., 2016)(target  
488 2), which also contains a consensus match (Figure 9A,B). When Xrp1 expression was

489 induced in transfected S2 cells, each of these Xrp1-binding sequences conferred 3x-8x  
490 activation of luciferase expression, whereas scrambled sequences were inactive (Figure  
491 9C,D, Figure 9- figure supplement 1A,B). In the case of target 1, several-fold further  
492 induction was achieved by co-transfection and induction of Irbp18 expression,  
493 culminating in 23x stimulation of luciferase expression by repeats of the Target 1  
494 sequence in conjunction with the hsp70 basal promoter (Figure 9- figure supplement  
495 1A). Irbp18 alone was inactive in the absence of transfected Xrp1 (Figure 9C,D; Figure  
496 9- figure supplement 1A,B). Thus, the Xrp1/Irbp18 heterodimer stimulated transcription  
497 through its cognate binding sequences.

498 It has been suggested that an oxidative stress response in  $Rp^{+/-}$  cells leads to  
499 competition with wild type cells (Kucinski et al., 2017; Baumgartner et al., 2021).  $Rp^{+/-}$   
500 cells express GstD1 reporters, whose transcription is activated by Nrf2, the master  
501 regulator of oxidative stress responses (Kucinski et al., 2017). Because the genes  
502 expressed in  $Rp^{+/-}$  cells are also enriched for Xrp1 binding motifs, some of these genes  
503 might be activated directly by Xrp1, including GstD1 (Ji et al., 2019). The GstD1-GFP  
504 reporter used to report oxidative stress in  $Rp^{+/-}$  cells contains a 2.7 kb genomic fragment  
505 that contains an Antioxidant Response Element (ARE) bound by the Nrf2/Keap1 dimer  
506 at position 1450-1460 (Figure 9E). Deletion of this motif abolishes GstD1-GFP induction  
507 in response to oxidative stress (Sykietis & Bohmann, 2008). Recently, Brown et al  
508 identified Xrp1 binding motifs within the same GstD1-GFP reporter, and showed that  
509 these sequences are required for Xrp1-dependent induction in response to ER  
510 stress (Brown, Mitra, Roach, Vasudevan, & Ryoo). We therefore compared induction of  
511 GstD1-GFP reporters in  $Rp^{+/-}$  wing discs where the reporter sequences were either wild  
512 type, deleted for the Nrf2 binding motif, or mutated at the Xrp1-binding motifs (Figure  
513 9E). We found that the Nrf2 binding motif was dispensable for GstD1-GFP induction in  
514  $Rp^{+/-}$  wing discs, whereas the Xrp1 sites were required, consistent with induction of  
515 GstD1-GFP and perhaps other genes as direct transcriptional targets of Xrp1, not  
516 Nrf2 (Figure 9F-O).

517

518

519 DISCUSSION



520

521           We explored the mechanisms by which *Rp* mutations affect *Drosophila* imaginal  
522 disc cells, causing reduced translation and elimination by competition with wild type  
523 cells in mosaics. Our findings reinforced the key role played by the AT-hook bZip  
524 protein Xrp1, which we showed is a sequence-specific transcription factor responsible  
525 for multiple aspects of not only the *Rp* phenotype, but also other ribosomal stresses  
526 (Figure 10). It was Xrp1, rather than the reduced levels of ribosomal subunits, that  
527 affected overall translation rate, primarily through PERK-dependent phosphorylation of  
528 eIF2 $\alpha$ . Phosphorylation of eIF2 $\alpha$ , as well as other disruptions to ribosome biogenesis  
529 and function such as reduction in rRNA synthesis or depletion of translation factors,  
530 were all sufficient to cause cell competition with nearby wild type cells, but this occurred  
531 because all these perturbations activated Xrp1, not because differences in translation  
532 levels between cells cause cell competition directly (Figure 10). Other features of *Rp*<sup>+/-</sup>  
533 cells, including protein aggregation and activation of ‘oxidative stress’ genes, were also  
534 coordinated by Xrp1, contrary to the notion that proteotoxic stress directly triggers  
535 oxidative damage in *Rp*<sup>+/-</sup> cells. These findings confirm the central importance of the  
536 transcriptional response to *Rp* mutations, and to other disruptions of ribosome  
537 biogenesis and function. They suggest therapeutic approaches to ribosomopathies,  
538 and have implications for the surveillance of aneuploid cells.

539

#### 540 **Ribosome levels are modestly affected by *Rp* gene haploinsufficiency**

541           Multiple assays show that ribosome subunit concentration is only moderately  
542 affected by *Rp* haploinsufficiency. In *RpL* mutants, we have seen 15-20% reduction in  
543 LSU concentrations, and 0-25% reduction in SSU concentrations, whereas in *RpS*  
544 mutants we have seen 20-25% reduction in SSU concentrations and 0-10% increase in  
545 LSU concentrations. Consistent with this, mass spec measurements of *RpS3*<sup>+/-</sup> and  
546 *RpS23*<sup>+/-</sup> *Drosophila* wing discs found that other RpS proteins were typically under-  
547 represented but RpL subunits over-represented in these genotypes (Baumgartner et al.,  
548 2021; Recasens-Alvarez et al., 2021). Broadly similar results have been reported in  
549 yeast, and the major changes in yeast gene expression following reduced Rp  
550 expression also seem to have a transcriptional basis, not translational (Cheng et al.,

551 2019). We found that ribosomal subunit levels were unaffected by *Xrp1*, suggesting  
552 that changes to their levels are likely more direct consequences of the *Rp* mutations.

553 The fact that ribosome subunit concentrations change modestly, and differently  
554 between mutations affecting LSU and SSU proteins, does not rule out functional  
555 consequences of these changes, which could depend more on the concentrations of  
556 free SSU and LSU than on their total concentrations. It suggests, however, that cellular  
557 and animal models of DBA that have generally sought to achieve a 50% reduction in Rp  
558 protein expression(Heijnen et al., 2014; Khajuria et al., 2018) could be significantly more  
559 severe than occurs in DBA patients, and that actual ribosome subunit concentrations  
560 should be measured in DBA patient cells to guide future models.

561 Multiple explanations for the modest effects of *Rp* haploinsufficiency on ribosome  
562 subunit number are possible. We particularly point out that, even if expression of a  
563 particular Rp is reduced in proportion to a 50% reduction in mRNA level, the respective  
564 protein concentration (ie number of molecules/cell volume) is unlikely to fall to 50%,  
565 because ribosomes are required for cellular growth, so that an *Rp* mutation affects the  
566 denominator in the concentration equation, as well as the numerator. It is even possible  
567 that a 50% reduction in its rate of Rp synthesis could leave steady state ribosome  
568 subunit concentration unaffected, if cellular growth rate was slowed by the same  
569 amount.

570

### 571 ***Rp* mutant cells accumulate ribosome biogenesis intermediates but protein** 572 **aggregates requires *Xrp1***

573 The other proximate effect of *Rp* mutations is the accumulation and disposal of  
574 ribosome components that are left unused. We confirmed that ribosome assembly  
575 intermediates do indeed accumulate in *Drosophila* wing discs following *Rp*  
576 haploinsufficiency. Reduction in poll activity parallel with *Rp* haploinsufficiency did not  
577 suppress the *Rp* phenotype, however, providing no support for a signaling species  
578 containing both RNA and unused Rp. In yeast, aggregates of unused Rp rapidly trigger  
579 specific transcriptional responses(Albert et al., 2019; Tye et al., 2019). In *Drosophila*  
580 *Rp*<sup>+/-</sup> cells, *Xrp1* expression depends particularly on RpS12, rather than on all unused  
581 Rp(Lee et al., 2018; Boulan et al., 2019; Ji et al., 2019). Significantly, the protein



582 aggregates that had been detected in *Rp* mutant *Drosophila* wing discs (Baumgartner et  
583 al., 2021; Recasens-Alvarez et al., 2021) appeared specific for mutations in SSU  
584 proteins, and were a downstream consequence of Xrp1 activity rather than direct  
585 consequence of *Rp* mutations (Figure 10). Reduced translation and cell competition are  
586 features of both RpS and RpL mutants(Lee et al., 2018). On the other hand, differences  
587 between effects of RpS and RpL mutations, which are also seen in yeast (Cheng et al.,  
588 2019), could account for the contradictory findings that autophagy seems protective for  
589 cells mutated for RpS genes(Baumgartner et al., 2021; Recasens-Alvarez et al., 2021),  
590 but promotes competitive apoptosis in cells mutated for an LSU gene(Nagata et al.,  
591 2019). Although it seems clear that unused Rp aggregate in yeast, whether the  
592 particular protein aggregates visible in *Drosophila* cells contain Rp or represent the  
593 primary feature of 'loser status' in cell competition requires more investigation.  
594 Alternatively, *Rp* mutations may cause rapid transcriptional reprogramming in  
595 *Drosophila* cells(Lee et al., 2018), as also occurs in yeast(Albert et al., 2019; Cheng et  
596 al., 2019; Tye et al., 2019).

597

### 598 ***Rp* mutants affect global translation rate through eIF2 $\alpha$**

599 The main mechanism by which Xrp1 suppresses global translation in *Rp*<sup>+/-</sup>  
600 mutants was shown to be PERK-dependent phosphorylation of eIF2 $\alpha$ . PERK is  
601 activated by ER stress, although the IRE/Xbp1 branch of the UPR was not  
602 unequivocally detected in *Rp*<sup>+/-</sup> mutants. *Rp*<sup>+/-</sup> cells may be sensitized to activate PERK  
603 by Xrp1-dependent changes in transcription of Perk, BiP, and other UPR genes (Figure  
604 10).

605 If eIF2 $\alpha$  phosphorylation level, or its effects on translation, are involved in human  
606 ribosomopathies, its manipulation might be therapeutic. It is notable that knock-out of  
607 CReP, one of the two mouse PPP1R15 homologs, causes anemia, similar to DBA  
608 (Harding et al., 2009; Da Costa et al., 2018), and that PERK-dependent eIF2 $\alpha$   
609 phosphorylation occurs in RpL22-deficient mouse  $\alpha\beta$  T-cells, and activates p53 there  
610 (Solanki et al., 2016). Thus, inhibitors of eIF2 $\alpha$  phosphorylation could be explored as  
611 potential DBA drugs. TAF1B depletion, which also acted through Xrp1 and eIF2 $\alpha$   
612 phosphorylation in *Drosophila*, is a model of Treacher Collins Syndrome(Trainor, Dixon,

613 & Dixon, 2009), and failure to release eIF6, leading to defective LSU maturation and  
614 80S ribosome formation, causes Schwachman Diamond syndrome(Warren, 2018), two  
615 other ribosomopathies where potential contributions of eIF2 $\alpha$  phosphorylation remain to  
616 be investigated.

617

618 **Differences in translation can cause competition between cells but indirectly,**  
619 **through Xrp1**

620 Because eIF2 $\alpha$  phosphorylation alone was sufficient to target cells for  
621 competitive elimination, it seemed at first that eIF2 $\alpha$  phosphorylation was the  
622 mechanism by which Xrp1 caused cell competition, which often correlates with  
623 differences in cellular translation levels(Nagata et al., 2019). Importantly, since another  
624 group concluded that eIF2 $\alpha$  phosphorylation in *Rp*<sup>+/-</sup> cells did not lead to cell  
625 competition(Baumgartner et al., 2021), our different conclusion is independently  
626 corroborated by the observation that haploinsufficiency for the *eIF2 $\gamma$*  gene, which  
627 encodes another subunit of eIF2, initiates cell competition as efficiently as *Rp*  
628 haploinsufficiency does(Ji et al., 2021). We found here, however, that eIF2 $\alpha$   
629 phosphorylation did not cause cell competition directly, but because phosphorylation of  
630 eIF2 $\alpha$  was itself sufficient to activate Xrp1 expression, and therefore cell competition  
631 through other Xrp1 targets(Figure 10). Elimination of *eIF2 $\gamma$*  haploinsufficient cells is  
632 also Xrp1-dependent, as expected if it is Xrp1 that is the key regulator of cell  
633 competition downstream of eIF2 activity(Ji et al., 2021). Knock-down of factors directly  
634 involved in the translation mechanism further distinguished cell competition from  
635 differential translation levels. Like eIF2 $\alpha$  phosphorylation, these defects induced Xrp1  
636 expression, which was required for the cell competition observed. Altogether, these  
637 results confirmed that reductions in global translation only trigger cell competition when  
638 Xrp1 is induced (Figure 10).

639 Through Xrp1, translation factor knockdown in turn also led to eIF2 $\alpha$   
640 phosphorylation. This was responsible for some of the dependence of global translation  
641 on translation factors ie translation was partially restored in cells depleted for translation  
642 factors when Xrp1 was depleted or eIF2 $\alpha$  dephosphorylated. Surprisingly, eIF6 and

643 eEF1 $\alpha$ 1 knockdown seemed not to reduce global translation at all, other than through  
644 Xrp1.

645

### 646 **Transcriptional regulation of cell competition**

647 How does Xrp1 mark cells for competitive elimination, if not through eIF2 $\alpha$   
648 phosphorylation and reduced translation? Here we confirm that Xrp1 is a sequence-  
649 specific transcriptional activator. One suggestion has been that *Rp*<sup>+/-</sup> cells experience  
650 oxidative stress, and that an oxidative stress response predisposes them to elimination  
651 by competition with wild type cells (Kucinski et al., 2017; Baumgartner et al., 2021;  
652 Recasens-Alvarez et al., 2021). Because our studies showed that GstD1-GFP, the  
653 oxidative stress reporter in previous studies, was probably activated directly by Xrp1-  
654 binding in *Rp*<sup>+/-</sup> cells, and that a Xrp1-site mutated reporter was inactive in *Rp*<sup>+/-</sup> cells  
655 although retaining the Nrf2-dependent ARE site, it is questionable whether *Rp*<sup>+/-</sup> cells in  
656 fact experience significant oxidative stress or Nrf2 activity. Instead, direct transcriptional  
657 targets of Xrp1 may predispose *Rp*<sup>+/-</sup> and other cells to elimination by competition with  
658 wild type cells (Figure 10).

659

### 660 **Xrp1 as a central orchestrator of cell competition**

661 Our results reveal the central importance of Xrp1 as the driver of cell competition  
662 (Figure 10). Far from being expressed specifically in *Rp* mutants, we now find that Xrp1  
663 is induced by multiple challenges, not only to ribosome biogenesis, such as depletion of  
664 the poll cofactor TAF1B or LSU maturation factor eIF6, but to ribosome function, both at  
665 the levels of initiation or elongation, leading to cell competition and to Xrp1-dependent  
666 eIF2 $\alpha$  phosphorylation. Whereas RpS12, which is crucial for Xrp1 induction in *Rp*<sup>+/-</sup>  
667 cells, was also important for TAF1B-depleted cells, it was less important for cells where  
668 ribosome function was affected, suggesting distinct mechanisms for Xrp1 induction  
669 (Figure 10).

670 It will be important now to determine whether yet other examples of cell competition  
671 involve Xrp1. For example, cells mutated for Helicase at 25E (Hel25E), a helicase that  
672 plays roles in mRNA splicing and in mRNA nuclear export, are lost in competition with  
673 wild type cells (Nagata et al., 2019). Although this has been attributed to lower

674 translation in He125A cells, another explanation could be that He125A depletion induces  
675 Xrp1 expression. Cells with other defects affecting translation are also reportedly  
676 disadvantaged in mosaics, including mutations of an eIF5A-modifying enzyme(Patel,  
677 Costa-Mattioli, Schulze, & Bellen, 2009), and mutations of a pre-rRNA processing  
678 enzyme(Zielke, Vaharautio, Liu, & Taipale). It would not be surprising if other conditions  
679 that lead to eIF2 $\alpha$  phosphorylation, such as ER stress, nutrient deprivation, or viral  
680 infection(Ron & Walter, 2007; Hetz, 2012), also activate Xrp1 and are thereby marked  
681 for elimination by more normal neighbors (Figure10). It will be interesting to determine  
682 whether any of these conditions could interfere with surveillance and removal of  
683 aneuploid cells, given the potential importance for tumor surveillance(Ji et al., 2021).  
684 For example, it was already observed that nutrient deprivation interferes with  
685 competition of *Rp*<sup>+/-</sup> cells(Simpson, 1979), and therefore could interfere with the removal  
686 of aneuploid cells.

687         It will be important in future to evaluate Xrp1 expression and function in other  
688 examples of cell competition. Had we not evaluated Xrp1 expression and function in  
689 PPP1R15-depleted cells, we could have concluded that eIF2 $\alpha$  phosphorylation was the  
690 likely downstream effector of competition in *Rp* mutant cells, rather than an example of  
691 a further upstream stress that induces Xrp1, which appears to be the common driver of  
692 cell competition for multiple genotypes (Figure 10).

693

694

695

696

697 **Materials and Methods**

698 **Experimental Animals:** Fly strains were generally maintained at 25°C on yeast  
699 cornmeal agar. Yeast-glucose medium was generally used for mosaic experiments  
700 (Sullivan et al., 2000). Sex of larvae dissected for most imaginal disc studies was not  
701 differentiated.

702 **Clonal Analysis:** Genetic mosaics were generated using the FLP/FRT system using  
703 inducible heat shock FLP (hsFLP) transgenic strains. For making clones through  
704 mitotic recombination using inducible heat shock FLP (hsFLP), larvae of *Rp<sup>+/-</sup>*  
705 genotypes were subjected to 10-20 min heat shock at 37°C, 60 ± 12 hours after egg  
706 laying (AEL) and dissected 72 hr later. For making clones by excision of a FRT  
707 cassette, larvae were subjected to 10-30 min heat shock at 37°C (details in Suppl. Data  
708 Table 1), 36 ± 12 AEL for wild type background or 60 ± 12 hours AEL for *Rp<sup>+/-</sup>*  
709 background, and dissected 72 hr later.

710 **Drosophila stocks:** Full genotypes for all the experiments are listed in Suppl. Data  
711 Table 1. The following genetic strains were used: UAS-PPP1R15 (BL76250), UAS-  
712 PERK-RNAi (v110278 and v16427), UAS-Gcn2-RNAi (v103976), TRE-dsRED (37),  
713 P[GAL4-Act5C(FRT.CD2).P]S, P[UAS-His-RFP]3 (isolated from BL51308), UAS-  
714 TAF1B-RNAi (BL61957 and v105783), UAS-PPP1R15-RNAi (v107545 and BL 33011),  
715 UAS-w-RNAi (BL33623), UAS-CG6272-RNAi (BL33652), Xbp1-EGFP (33), UAS-  
716 eIF4G-RNAi (v17002), UAS-eEF2-RNAi (v107268), UAS-eEF1α1-RNAi (v104502),  
717 UAS-eIF5A-RNAi (v101513), UAS-eIF6-RNAi (v108094). Other stocks are described in  
718 (Lee et al., 2018).

719 **Immunohistochemistry and Antibody Labeling:** For most antibody labeling, imaginal  
720 discs were dissected from late 3rd instar larvae in 1xPBS buffer and fixed in 4%  
721 formaldehyde in 1x PEM buffer (1xPEM:100mM Pipes, 1mM EGTA, 1mM MgCl<sub>2</sub>, pH  
722 6.9). For p-eIF2α and p-RpS6 detection, larvae were dissected in Drosophila S2  
723 medium one by one and transferred immediately to fixative. Fixed imaginal discs were  
724 3x washed in PT (0.2% Triton X-100, 1xPBS) and blocked for 1 hour in PBT buffer  
725 (0.2% Triton X-100, 0.5% BSA, 1x PBS). Discs were incubated in primary antibody in  
726 PBT overnight at 4°C, washed 3 times with PT for 5-10 min each and incubated in  
727 secondary antibody in PBT for 3-4 hours at room temperature, and washed 3 times with

728 PT for 5-10 min. After washes, samples were rinsed in 1x PBS and the samples were  
729 incubated with the NuclearMask reagent (Thermofisher, H10325) for 10-15 min at room  
730 temperature. After washing 2x with 1x PBS the imaginal discs were mounted in  
731 VECTASHIELD antifade mounting medium (Vector Laboratories, H-1000). In  
732 experiments that we wanted to parallel process control samples on the same tube (e.g.  
733 Figure 5C vs 5J), we used male parents that had the genotypes *hsFLP*; *TRE-*  
734 *RFP*/(*PPP1R15* or *Xrp1RNAi* or *PERKRNAi*); *act>>Gal4*, *UAS-GFP* and cross them  
735 with females from the RNAi of interest. The genotypes in the same tube were  
736 discriminated using RFP before the addition of the secondary antibody. We used the  
737 following antibodies for staining: rabbit anti-phospho-RpS6 at 1:200 (kindly given by A.  
738 Teleman, DKFZ) (1:200), rabbit-p62 (kindly provided by Dr Juhász Gábor), rabbit anti-  
739 phospho-eIF2 $\alpha$  at 1:100 (Thermofisher, 44-728G), rabbit anti-Xrp1 at 1:200 (kindly  
740 provided by D. Rio), mouse anti-b-Galactosidase (J1e7, DSHB), rabbit anti-GFP, rabbit  
741 anti-active-Dcp1 (Cell Signaling Technology Cat#9578, 1:100), Y10b(1:100)  
742 (Thermofisher, MA1-13017), RpS9 (1:100) (Abcam, ab117861), RpL9(1:100) (Abcam,  
743 ab50384), rabbit-anti-Rack1 (1:100) (Cell Signalling, D59D5), rabbit anti-hRpL10Ab  
744 (1:100) (Sigma, Cat# SAB1101199). Secondary Antibodies were Cy2- and Cy5-  
745 conjugates (Jackson Immunoresearch) and Goat anti-Rabbit Alexa Fluor 555 (A21429,  
746 Thermofisher). Previous experiments established that significant results could be  
747 obtained from 5 replicates, although many more were imaged in most cases. No  
748 calculations regarding sample sizes were performed. No outliers or divergent results  
749 were excluded from analysis.

750 **Image Acquisition and Processing:** Confocal laser scanning images were acquired  
751 with a Leica Laser scanning microscope SP8 using 20x and 40x objectives. Images  
752 were processed using Image J1.44j and Adobe Photoshop CS5 Extended. Thoracic  
753 bristle images were recorded using Leica M205 FA and Leica Application Suite X.

754 **Measurement of in vivo translation:** Translation was detected by the Click-iT Plus  
755 OPP Alexa Fluor® 594 or 488 Protein Synthesis Assay Kit (Thermofisher, C10457) as  
756 described earlier (Lee et al, 2018). Larvae were inverted in Schneider's *Drosophila*  
757 medium (containing 10% heat inactivated Fetal Bovine Serum, Gibco) and transferred in  
758 fresh medium containing 1:1000 (20uM) of Click-iT OPP reagent. Samples were

759 incubated at room temperature for 15 minutes and rinsed once with PBS. The samples  
760 were fixed in 4% formaldehyde in 1x PEM buffer (100mM Pipes, 1mM EGTA, 1mM  
761 MgCl<sub>2</sub>) for 20 min, washed once with 1x PBS and subsequently washed with 0.5%  
762 Triton in 1x PBS for 10 min and then incubated for 10 min with 3% BSA in 1x PBS. The  
763 Click reaction took place in the dark at room temperature for 30 min. Samples were  
764 washed once with the rinse buffer of the Click reaction kit, 2 minutes with 3% BSA in 1x  
765 PBS, incubated for 1 hour at room temperature with PBT (1x PBS, 0.2% Triton, 0.5%  
766 BSA) and after that incubated overnight with the primary antibodies at 4°C. Samples  
767 were washed 3x with PT buffer (1x PBS, 0.2% Triton) and the secondary antibody was  
768 added for 2 hrs in room temperature. After 3x washes with PT and 1x with 1x PBS, the  
769 samples were incubated with the Nuclear Mask reagent (1:2000) of the Click-iT kit for  
770 30 min. After washing 2x with 1x PBS the imaginal discs were mounted in Vectashield.  
771 Confocal laser scanning images were acquired with a Leica Laser scanning microscope  
772 SP8.

### 773 **Northern Analysis**

774 RNA extraction, northern blotting procedures, and 18S, 5.8S, tubulin and actin probes  
775 were as described (Lee et al., 2018). Previous studies established that significant  
776 results could be obtained from 3 biological replicates. A biological replicate represents  
777 an independent RNA isolation, gel, and blot experiment.

778

779 The following primers were used to amplify the new probes in this paper:

780 ITS2 probe:

781 5'- CTTTAATTAATTTTATAGTGCTGCTTGG-3'

782 5'- TAATACGACTCACTATAGGGTGTATATAACTTTATCTTG-3'

783 28S probe:

784 5'-GCAGAGAGATATGGTAGATGGGC -3'

785 5'- TAATACGACTCACTATAGGGTCCACAATTGGCTACGTA ACT-3'

786 ITS1 probe

787 5'- GGAAGGATCATTATTGTATAATATC-3'

788 5'- TAATACGACTCACTATAGGGATGATTACCACACATTTCG-3'

789 **7SL probe:**



790 5'- TCGACTGGAAGGTTGGCAGCTTCTG-3'

791 5'- TAATACGACTCACTATAGGGATTGTGGTCCAACCATATCG-3'

792

### 793 **Plasmid cloning**

794 All the new plasmids described below were confirmed by DNA sequencing.

795 Control *Renilla* luciferase plasmid: The pGL3-Promoter Vector (Promega) was modified  
796 by replacement of the SV40 promoter by the *Drosophila* actin promoter from the  
797 pAct5.1/V5-His C vector (Thermo Scientific), and the firefly luciferase coding sequence  
798 by the *Renilla* luciferase (RLuc) coding sequence from the pIS1 plasmid (Addgene),  
799 yielding the pGL3-RLuc plasmid.

800 Firefly luciferase plasmids: The SV40 core promoter of the pGL3-Promoter Vector was  
801 by hsp70 and Xrp1core promoters, amplified from the pUAST vector (*Drosophila*  
802 Genomics Resource Center) and from wild-type *Drosophila* genomic DNA respectively,  
803 using primers with XhoI and HindIII restriction sites. The resulting pGL3-H and pGL3-X  
804 plasmids were digested with XhoI for insertion of annealed complementary  
805 oligonucleotides containing multiple copies of Target 1, Target 2, Target 3, or shuffled  
806 Target 1 or Target 2 sequences, resulting in the p-GL3-H-T1, p-GL3-H-T2, p-GL3-H-T3,  
807 p-GL3-H-T1S, p-GL3-H-T2S, pGL3-X-T1, pGL3-X-T2, pGL3-X-T3, pGL3-X-T1S, and  
808 pGL3-X-T2S plasmids.

809 Inducible expression plasmids: The Xrp1 (with and without its 3'UTR sequence) and  
810 Irbp18 (CG6272) coding regions were amplified from pUAST-Xrp1-HA and pUAST-  
811 CG6272 (Blanco et al., 2020), and inserted into pMT/V5-His A (Thermo Scientific)  
812 using XhoI and SpeI target sites, resulting in 3 inducible protein plasmids: pMT-  
813 Xrp1<sup>HA</sup>Δ3'UTR, pMT-Xrp1<sup>HA</sup> and pMT-Irbp18<sup>V5/His</sup>. pMT-Xrp1<sup>HA</sup> was not used further as  
814 it did not express Xrp1 protein in S2 cells.

### 815 **S2 cell culture and luciferase assays**

816 *Drosophila* S2 cells from the *Drosophila* Genomics Resource Center (DGRC - stock#6)  
817 were cultured in Schneider's medium (Thermo Scientific) supplemented with 10% Heat-  
818 Inactivated Fetal Bovine Serum (Thermo Scientific) at 25°C following the *General*  
819 *procedures for maintenance of Drosophila cell lines* from the DGRC. For luciferase  
820 assays, S2 cells were plated in 24-well plates, 5 x 10<sup>5</sup> cells per well. After 24h cells



821 were transfected with the indicated combination of control Rluc (0.15 ng/well), protein  
822 expression (15 ng/well) and target (4.5 ng/well) plasmids using TransIT-2020  
823 Transfection Reagent (Mirus) following the manufacturer's instructions. After 24h  
824 copper sulfate was added to a final concentration of 0.35 mM. After a further 24h cells  
825 were lysed and *Renilla* and *Firefly* luciferases' activity measured with a luminometer,  
826 following the instructions from the Dual-Luciferase Reporter Assay System (Promega).  
827 *Firefly* signal was normalized to the internal *Renilla* control. Each transfection was  
828 performed in triplicate, and experiments performed independently at least 3 times.

829

830

### 831 ACKNOWLEDGEMENTS

832

833 We thank Don Rio, Juhász Gábor and Aurelio Teleman for antibodies and Dirk Bohman,  
834 Katerina Papanikolopoulou, Hyung Don Ryoo, Efthimios Skoulakis and Eleni Tsakiri for  
835 other reagents. We thank Christos Delidakis, Nikolaos Konstantinides, Amit Kumar,  
836 Sudershana Nair, Venkateswara Reddy, Efthimios Skoulakis, and Deepika Vasudevan  
837 for comments on an earlier version of the manuscript. We thank Andreas Stasinopoulos  
838 for discussions, and Hyung Don Ryoo for sharing unpublished results. This work was  
839 supported by NIH grant GM120451 to NEB. *Drosophila* stocks were obtained from the  
840 Bloomington *Drosophila* Stock Center and Vienna Stock Resource Center (supported  
841 by NIH P40OD018537). Confocal microscopy was performed in the Analytical Imaging  
842 Facility of the Albert Einstein College of Medicine (supported by the NCI P30CA013330)  
843 using the Leica SP8 microscope acquired through NIH SIG 1S10 OD023591. Some  
844 data in this paper are from a thesis submitted in partial fulfillment of the requirements for  
845 the Degree of Doctor of Philosophy in the Biomedical Sciences, Albert Einstein College  
846 of Medicine.

847

848

849



853 **Figure 1 Modest changes in ribosomal subunit concentrations in *Rp* mutant wing**  
854 **discs**

855

856 A) Similar amounts of wing disc RNA from indicated genotypes separated and  
857 transferred for northern blotting with, in this case, probes specific for the 18S rRNA of  
858 the ribosomal SSU, the 7SL non-coding RNA for the Signal Recognition Particle, and  
859 the 5.8S rRNA of the ribosomal LSU. Right-most two lanes show serial two-fold  
860 dilutions of the wild type sample. Panels B-E show signal quantification from multiple  
861 such northern blots. B) *Xrp1* mutation did not affect LSU concentration in any *Rp* genotype.  
862 Significance shown only for *Xrp1*<sup>+/+</sup> to *Xrp1*<sup>+/-</sup> comparisons between otherwise similar  
863 genotypes. Exact Padj values were: 6.05, 5.16, 1.93, 6.37, 2.62 respectively. C) *Xrp1*  
864 mutation did not affect SSU concentration in any *Rp* genotype. Significance shown only  
865 for *Xrp1*<sup>+/+</sup> to *Xrp1*<sup>+/-</sup> comparisons between otherwise similar genotypes. Exact Padj  
866 values were: 4.70, 5.95, 6.94, 4.41, 8.05 respectively. D) Two *RpL* mutations reduced  
867 LSU concentrations. Significance shown only for comparisons between mutant  
868 genotypes and the wild type. Exact Padj values were: 0.00423, 0.0117, 0.0877, 0.858  
869 respectively. E) Two *RpS* mutations, as well as *RpL14*, reduced SSU concentrations.  
870 Significance shown only for comparisons between mutant genotypes and the wild type.  
871 Exact Padj values were: 0.135, 0.000218, 0.000395, 0.000602 respectively. Panels F-I  
872 show comparisons between antibody labelings of 5.8S rRNA, anti-RpL9, or anti-RpS12  
873 between wild type and *Rp*<sup>+/-</sup> cells in mosaic wing imaginal discs. F,F') *RpL27A* mutation  
874 reduced levels of 5.8SrRNA. G,G') *RpS3* mutation had negligible effect on 5.8S rRNA  
875 levels. H,H',H'') *RpL27A* mutation reduced levels of the LSU component RpL9 but not  
876 of the SSU component RpS12. I,I',I'') *RpS18* mutation reduced levels of the SSU  
877 component RpS12 but not of the LSU component RpL9. Statistics: One-way Anova  
878 with Bonferroni-Holm multiple comparison correction was performed for panels B-E,  
879 which were each based on 3 biological replicates. ns - p≥0.05. \* - p<0.05. \*\* - p<0.01.

880

881 **Figure 1 source data 1**

882 Full and unedited blots corresponding to panel A.

883



884 **Figure 1 source data 2**

885 Northern data underlying panels B-E.

886

887

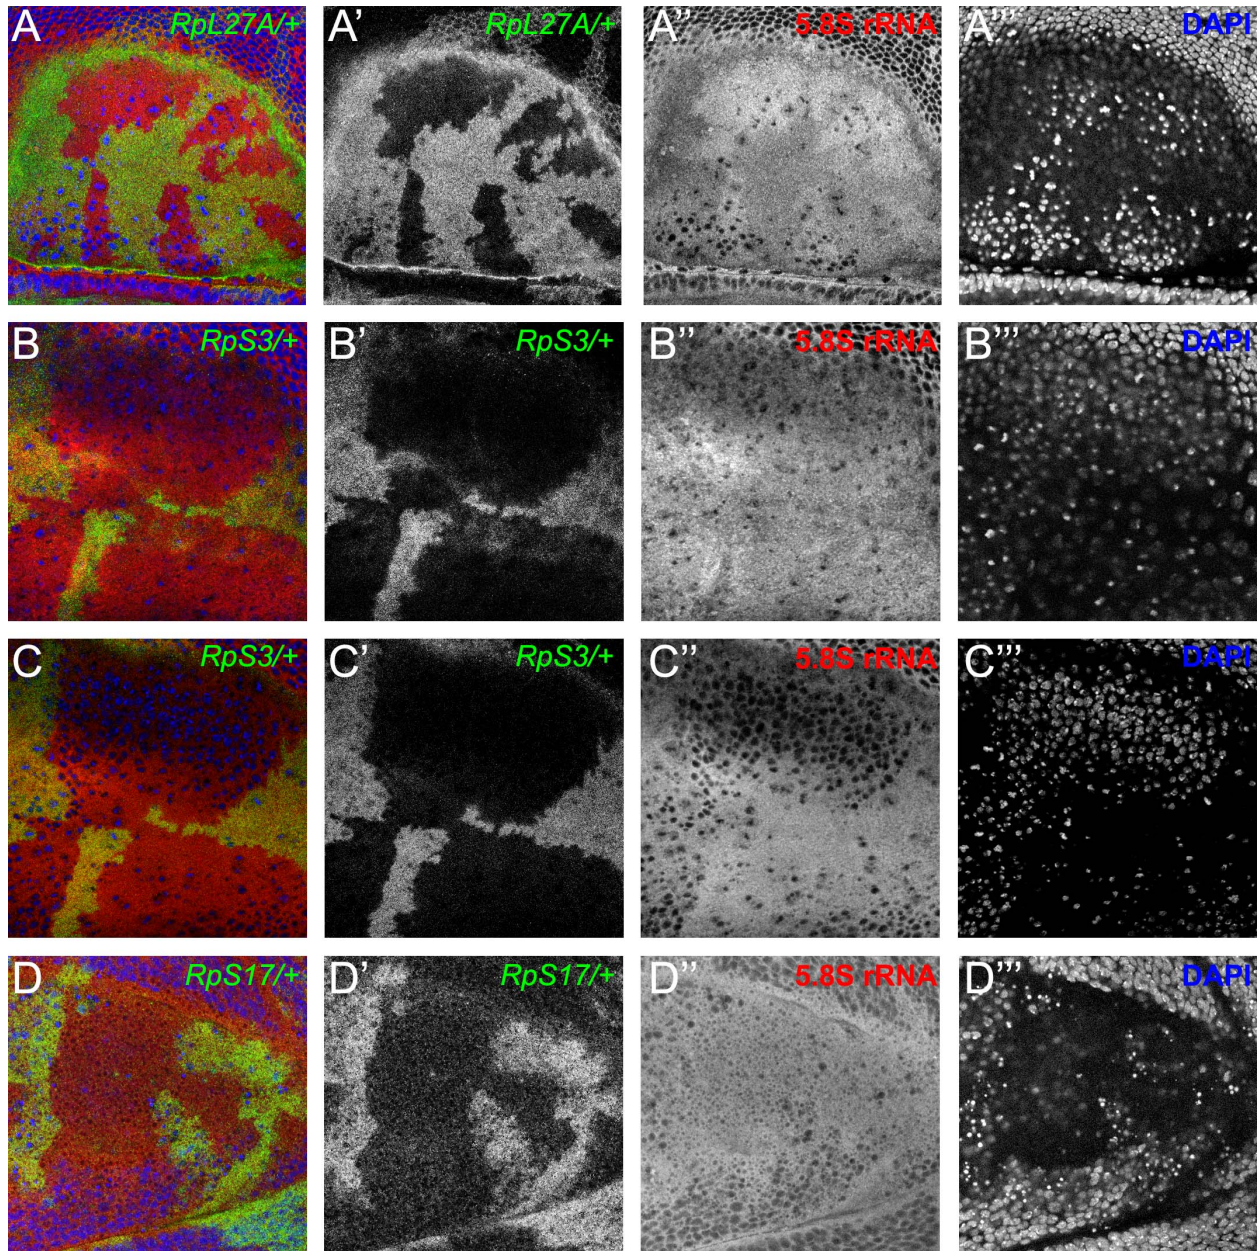

888

889 **Figure 1 Supplement 1 Cytoplasmic location of ribosome components**

890 Specimens including those from Figure 1F,G showing the nuclear channel that  
891 was recorded simultaneously in many experiments. A) This very apical confocal plane  
892 passes through only a few nuclei, particularly in wild type cells, verifying that the anti-



893 5.8S rRNA signal is predominantly cytoplasmic, consistent with mature LSU. B) This  
894 very apical confocal plane largely excludes nuclei, verifying that the anti-5.8S rRNA  
895 signal is predominantly cytoplasmic, consistent with mature LSU. C) This slightly less  
896 apical focal plane predominantly grazes nuclei only of wild type cells, verifying that little  
897 anti-5.8S rRNA signal is nuclear. D) This very basal confocal plane, which largely  
898 excludes nuclei for wild type regions, shows no discernible difference in cytoplasmic  
899 anti-5.8S rRNA signal between wild type and *RpS17/+* cells.

900

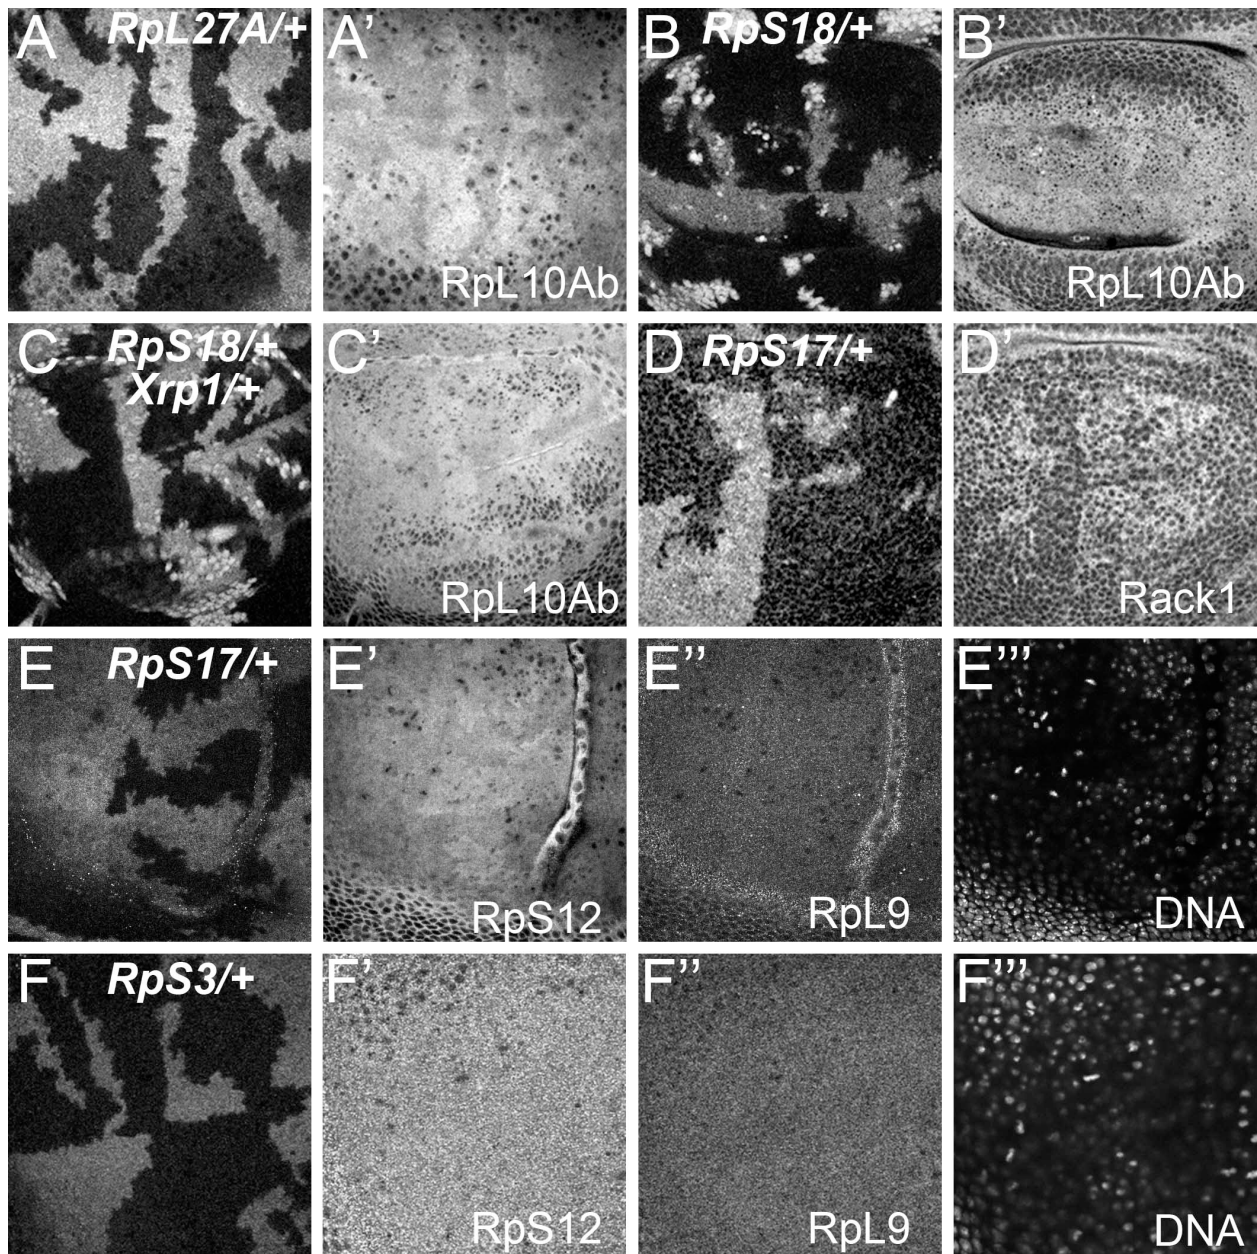

901

902 **Figure 1 Supplement 2 More examples of ribosome levels in *Rp* mutant**  
903 **genotypes.**

904 Panels A-F show mosaic wing discs containing unlabelled *Rp*<sup>+/+</sup> cells and labelled cells  
905 of indicated *Rp*<sup>+/-</sup> genotypes. Panels A'-F', E'' and F'' show these same discs labelled  
906 with the antibodies against the indicated Rp. Panels E''' and F''' indicate DNA, in these  
907 cases indicating an apical confocal plane above most nuclei. A) *RpL27A*<sup>+/-</sup> cells  
908 contained less of the LSU component RpL10Ab. B) *RpS18*<sup>+/-</sup> cells contained more of  
909 the LSU component RpL10Ab. C) *RpS18*<sup>+/-</sup>*Xrp1*<sup>+/-</sup> cells contained more of the LSU  
910 component RpL10Ab than *RpS18*<sup>+/+</sup>*Xrp1*<sup>+/-</sup> cells. D) *RpS17*<sup>+/-</sup> cells contained less of the  
911 SSU component Rack1. E) *RpS17*<sup>+/-</sup> cells contained less of the SSU component RpS12  
912 but levels of the LSU component RpL9 were indistinguishable from *RpS17*<sup>+/+</sup> cells. F)  
913 *RpS3*<sup>+/-</sup> cells contained levels of RpS12 and RpL9 indistinguishable from *RpS3*<sup>+/+</sup> cells.  
914



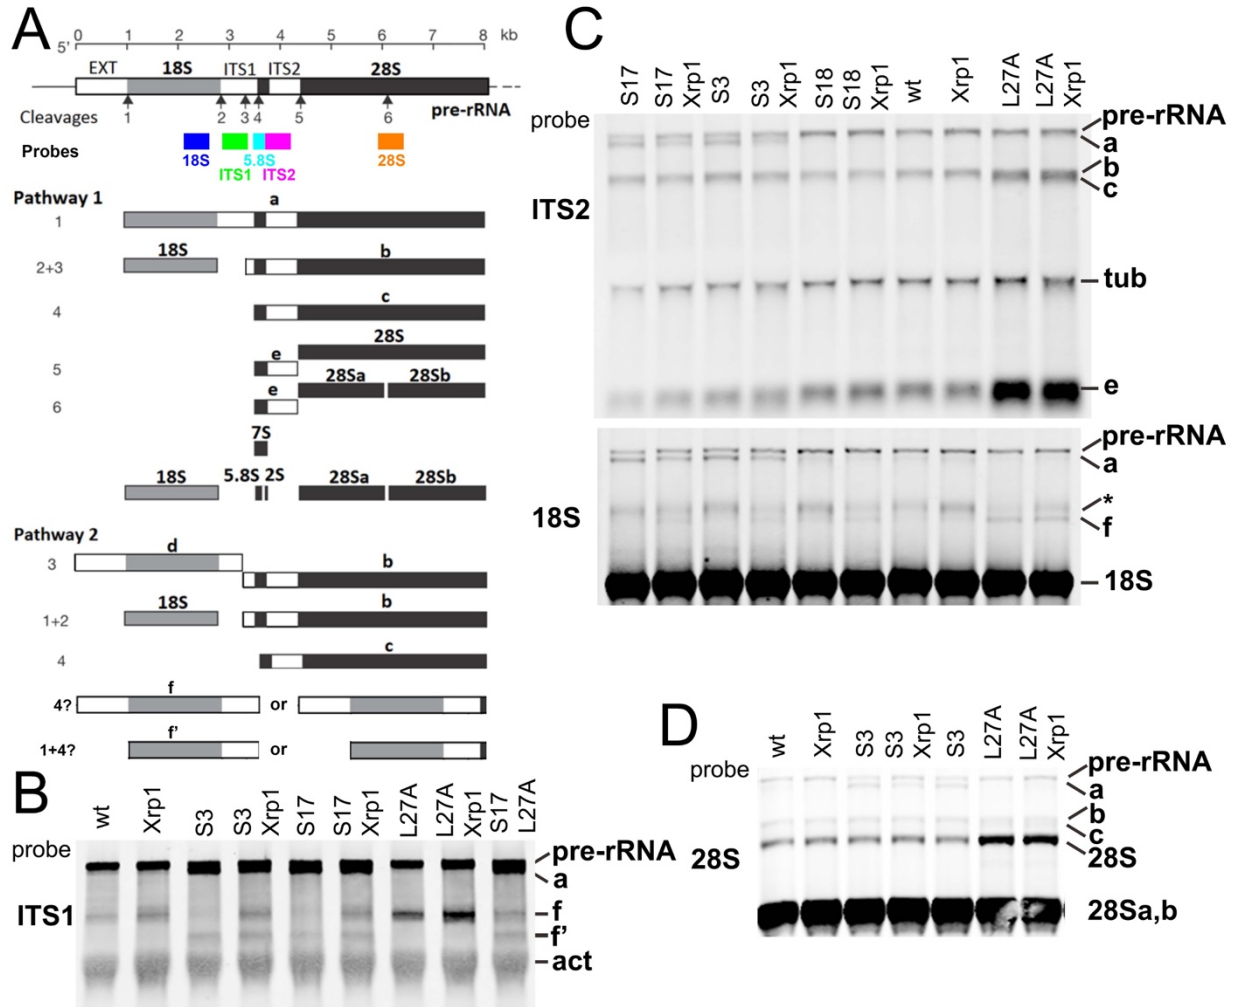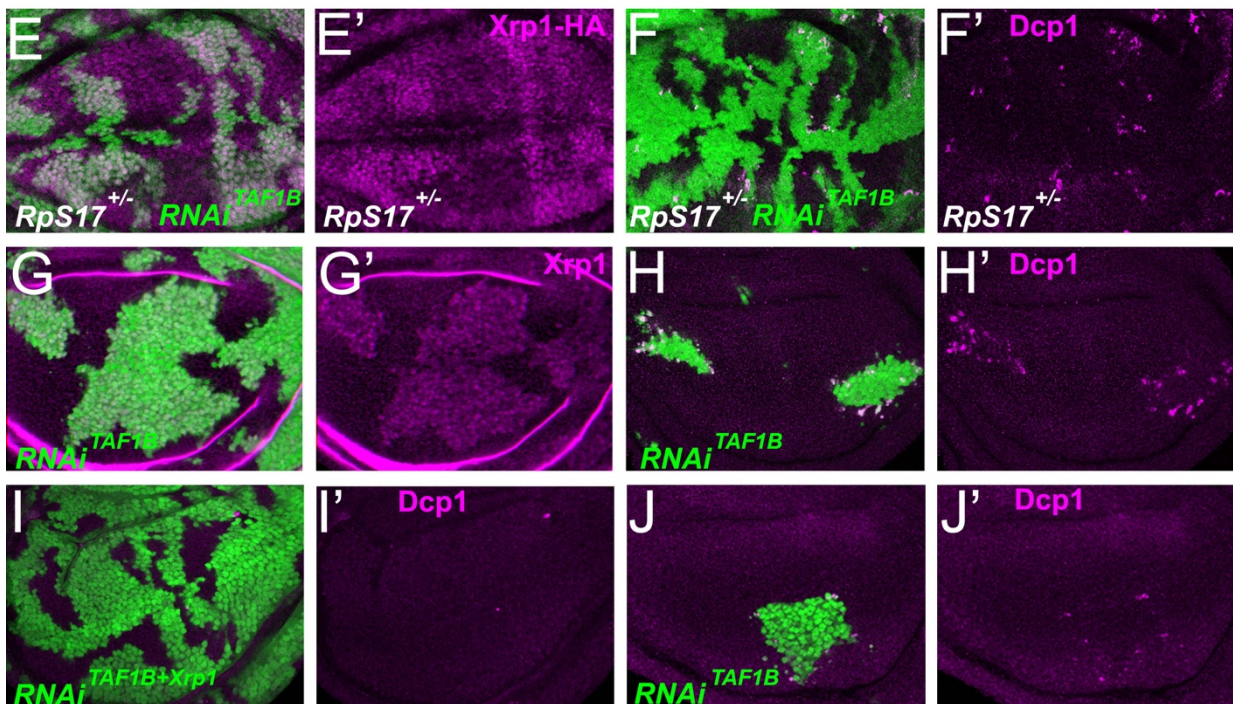

915

916 **Figure 2. Ribosome biogenesis defects and their consequences**

917 A) Two pathways of rRNA processing and the intermediates that result were  
918 characterized in *D. melanogaster* embryos by Long and Dawid. Mature 18S, 5.8S and  
919 28Sa,b rRNAs are processed from the pre-RNA, along with the removal of two interval  
920 sequences ITS1 and ITS2. The cleavages sites were described by Long and Dawid.  
921 Colored boxes indicate the probes used in the present study. The 5.8S probe overlaps  
922 with 147 bases at 3' of the ITS1 region, excluding cleavage site 3. Additional  
923 intermediates **f** and **f'** were observed in the wing imaginal disc samples. These were  
924 recognized by ITS1, 5.8S (Figure 2 Supplement 1) and 18S probe and therefore  
925 extended beyond the cleavage site 3, although whether beyond site 4 was uncertain.  
926 B-D) Northern blots of total RNA purified from wild-type and *Rp*<sup>+/-</sup> wing discs, probed as  
927 indicated. B) Reprobed with ITS1 after an initial actin probe. C) Reprobed with ITS2 and  
928 then 18S probes after an initial tubulin probe. Intermediates **b**, **f** and the 28S rRNA  
929 (which in *Drosophila* is a precursor to the mature 28Sa and 28Sb rRNAs) were detected  
930 in wild type and *Xrp1*<sup>+/-</sup> wing discs, other intermediates only in *Rp*<sup>+/-</sup> genotypes. *RpS3*<sup>+/-</sup>  
931 and *RpS17*<sup>+/-</sup> had lower levels of pre-RNA and intermediate **f** but accumulate  
932 intermediates **a** and **f'**, which might indicate delays in cleavages 2 and 3. *RpS18*<sup>+/-</sup> had  
933 increased levels of pre-RNA and intermediate **f**. *RpL27A*<sup>+/-</sup> accumulated bands **b**, **c**, **e**,  
934 and **f** and 28S. The effect on **f** suggests crosstalk between RpL27A and SSU  
935 processing. E-I) show single confocal planes from mosaic third instar wing imaginal  
936 discs  
937 E) TAF1B depletion (green) increased Xrp1-HA levels in *RpS17*<sup>+/-</sup> discs (magenta, see  
938 also E'). F) TAF1B depletion (green) increased in *RpS17*<sup>+/-</sup> discs led to cell death at  
939 the boundaries with undepleted cells (active Dcp1 staining in magenta, see also F'). G)  
940 TAF1B depletion (green) also increased Xrp1 protein levels in *RpS17*<sup>+/+</sup> discs (magenta,  
941 see also G'). H) TAF1B depletion (green) led to cell death at the boundaries with  
942 undepleted cells (active Dcp1 staining in magenta, see also H'). I) Co-depletion of  
943 Xrp1 with TAF1B (green) largely abolished cell death at the clone interfaces (active  
944 Dcp1 staining in magenta, see also I'). J) Clones of cells depleted for TAF1B in parallel  
945 with panel I, showing reduced clones size and number (green), and competitive cells



946 death at boundaries (magenta, see also J'. Additional data related to this Figure is  
947 presented in Figure 2 Supplement 1.

948

949 **Figure 2 source data 1**

950 Full and unedited blots corresponding to panel B

951

952 **Figure 2 source data 2**

953 Full and unedited blots corresponding to panel C

954

955 **Figure 2 source data 3**

956 Full and unedited blots corresponding to panel D

957

958

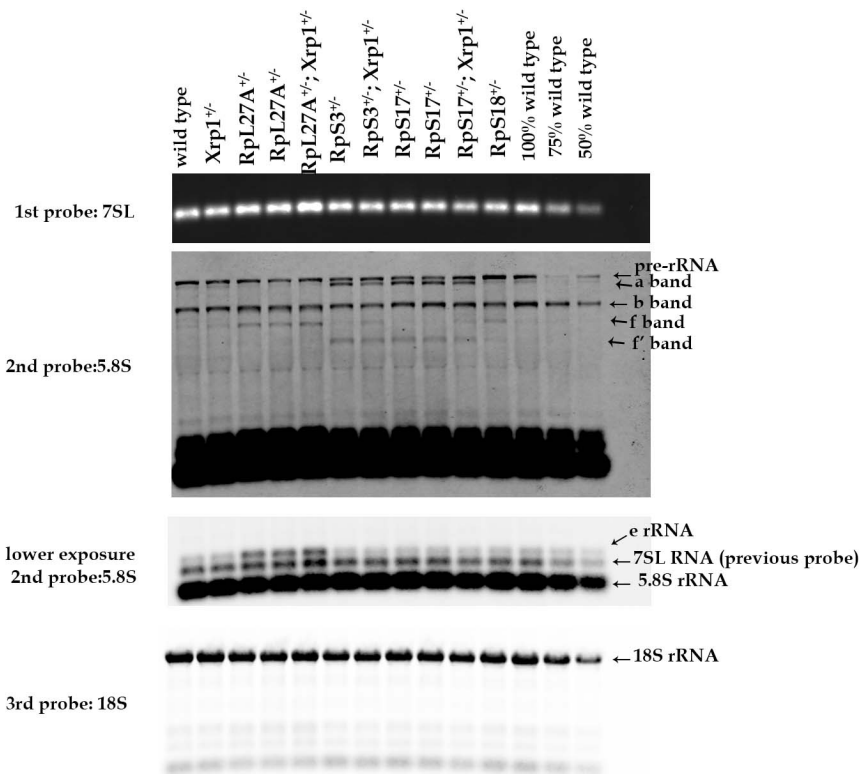

959

960 **Figure 2 Supplement 1. Additional northern blots detecting rRNA intermediates**

961 Northern blots of total RNA purified from wild-type and *Rp*<sup>+/-</sup> wing discs, reprobated with

962 5.8S probe and then 18S probe after an initial 7SL probe.

963

964 **Figure 2 Supplement 1 Source data 1**

965 Full and unedited blots corresponding to Figure 2 supplement 1

966

967

968

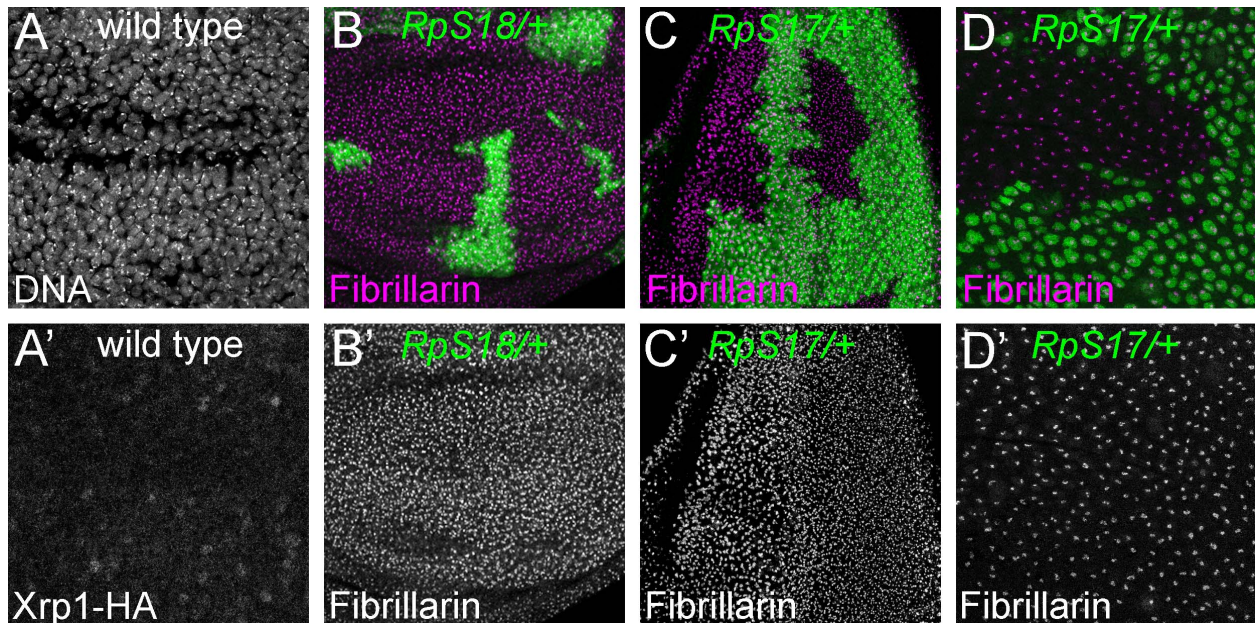

969

970 **Figure 2 Supplement 2. Nucleoli in wild type and *Rp* mutant cells**

971 A) Confocal section of Xrp1-HA wing disc showing many nuclei labelled for DNA. A')

972 HA labeling reveals minimal Xrp1 expression in this otherwise wild type wing disc.

973 Nucleoli are not obviously labelled. B) Mosaic wing disc containing *RpS18*<sup>+/-</sup> cells

974 (green). Anti-fibrillarin labeling of nucleoli reveals no obvious differences between

975 *RpS18*<sup>+/-</sup> and *RpS18*<sup>+/+</sup> cells (projected in magenta; see also B'). C) Mosaic eye disc

976 containing *RpS17*<sup>+/-</sup> cells (green). Anti-fibrillarin labeling of nucleoli reveals no obvious

977 differences between *RpS17*<sup>+/-</sup> and *RpS17*<sup>+/+</sup> cells (projected in magenta; see also C').

978 D) Peripodial membrane from mosaic eye eye disc containing *RpS17*<sup>+/-</sup> cells (green).

979 Anti-fibrillarin labeling of nucleoli reveals no obvious differences between *RpS17*<sup>+/-</sup> and

980 *RpS17*<sup>+/+</sup> cells (projected in magenta; see also D').

981



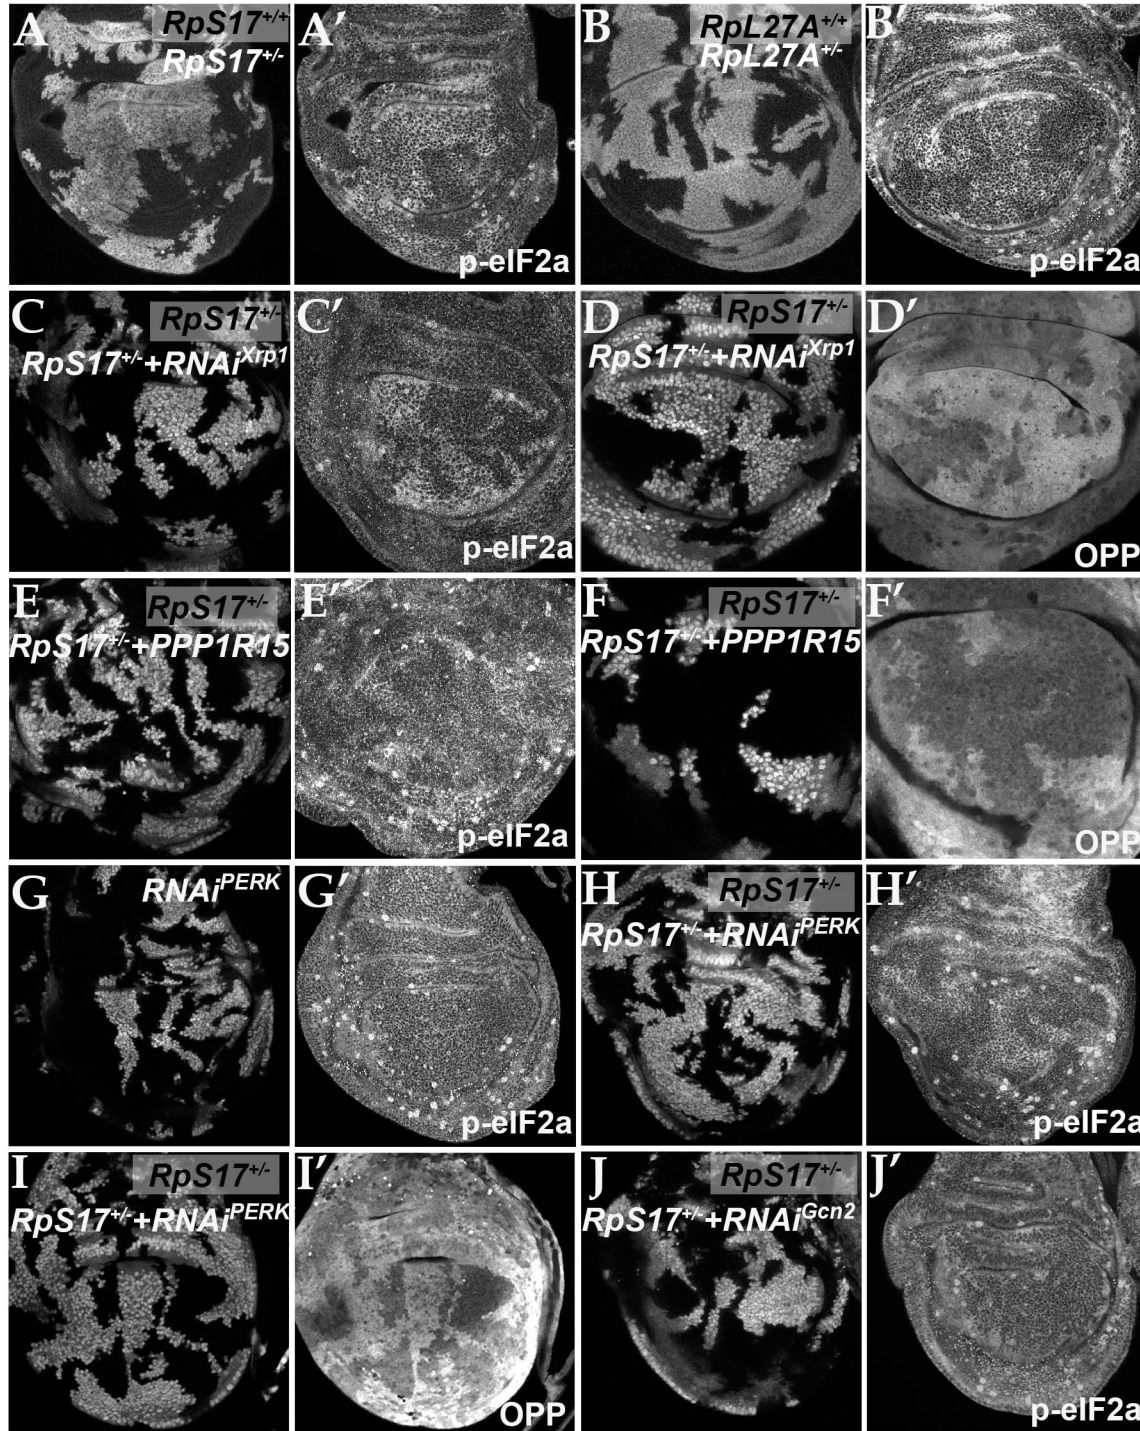

982

983 **Figure 3 eIF2α is phosphorylated in ribosomal protein mutants via Xrp1 and**  
984 **PERK.**

985 Panels A-J show single confocal planes from third instar wing imaginal discs

986 A) Mosaic of *RpS17<sup>+/-</sup>* and *RpS17<sup>+/+</sup>* cells. p-eIF2α levels were increased in *RpS17<sup>+/-</sup>*

987 cells (see A'). B) Mosaic of *RpL27A<sup>+/-</sup>* and *RpL27A<sup>+/+</sup>* cells. p-eIF2α levels were

988 increased in *RpL27A<sup>+/-</sup>* cells (see B'). C) Labelled clones of cells expressing Xrp1-RNAi  
989 in a *RpS17<sup>+/-</sup>* wing disc. p-eIF2 $\alpha$  levels were reduced by Xrp1 depletion (see C'). D)  
990 Labelled clones of cells expressing Xrp1-RNAi in a *RpS17<sup>+/-</sup>* wing disc. Translation rate  
991 was restored by Xrp1 depletion (see D'). E) Labelled clones of cells over-expressing  
992 PPP1R15 in a *RpS17<sup>+/-</sup>* wing disc, . p-eIF2 $\alpha$  levels were reduced by PPP1R15 over-  
993 expression (see E'). F) Labelled clones of cells over-expressing PPP1R15 in a  
994 *RpS17<sup>+/-</sup>* wing disc. Translation rate was restored by PPP1R15 over-expression (see  
995 F'). G) Labelled clones of cells expressing PERK-RNAi in an otherwise wild type wing  
996 disc. p-eIF2 $\alpha$  levels were unaffected (see G'). Note that in this and some other panels  
997 where mitotic cells are visible near the apical epithelial surface, mitotic figures are  
998 labeled by the anti-p- eIF2 $\alpha$  antibody, and also lack OPP incorporation. H) Labelled  
999 clones of cells expressing PERK-RNAi in a *RpS17<sup>+/-</sup>* wing disc. p-eIF2 $\alpha$  levels were  
1000 reduced by PERK knockdown (see H'). I) Labelled clones of cells expressing PERK-  
1001 RNAi in a *RpS17<sup>+/-</sup>* wing disc. Translation rate was restored by PERK knockdown (see  
1002 I'). J) Labelled clones of cells expressing Gcn2-RNAi in a *RpS17<sup>+/-</sup>* wing disc. p-eIF2 $\alpha$   
1003 levels were not reduced by Gcn2 knockdown (see J'). Further data relevant to this  
1004 Figure are shown in Figure 3 Supplement 1.  
1005



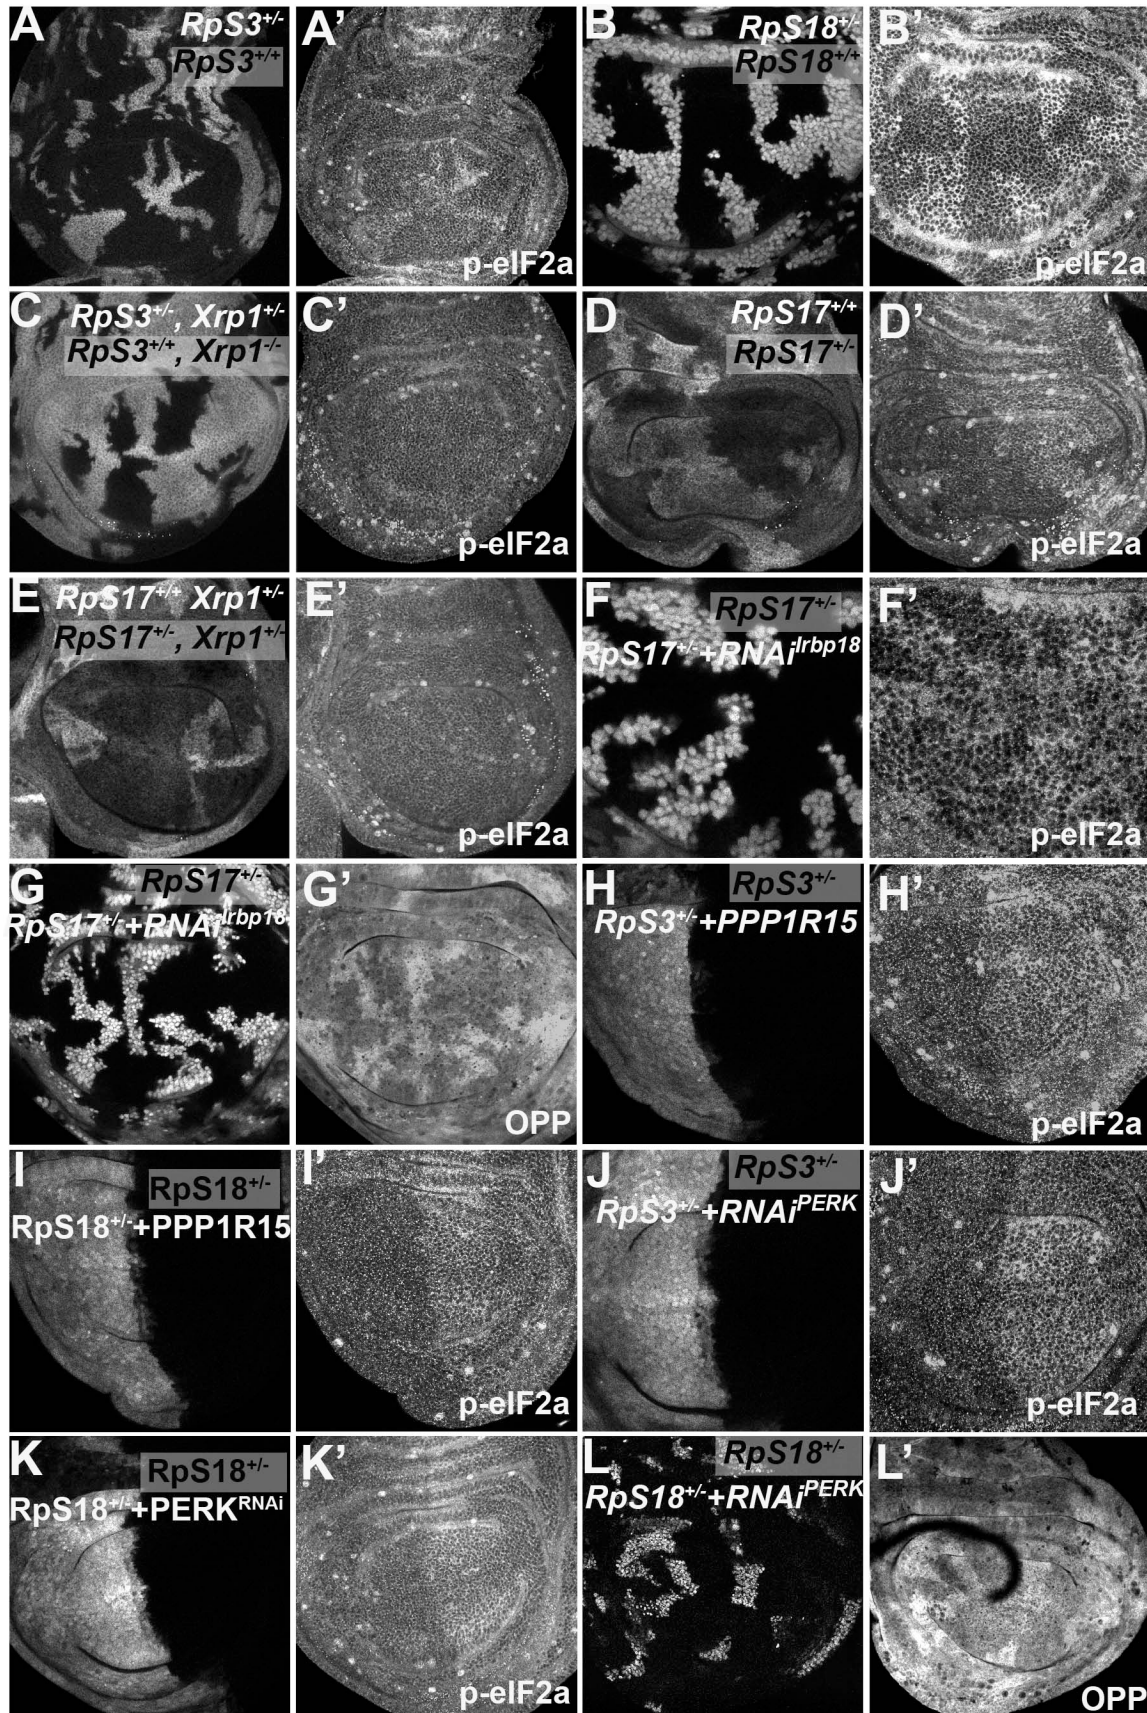

1007 **Figure 3 Supplement 1 eIF2 $\alpha$  phosphorylation in *Rp*<sup>+/-</sup> cells depends on *Xrp1* and**  
1008 ***Irpb18*.**

1009 Panels A-L show single confocal planes from third instar wing imaginal discs.

1010 A) Mosaic of *RpS3*<sup>+/-</sup> and *RpS3*<sup>+/+</sup> cells. p-eIF2 $\alpha$  levels were increased in *RpS3*<sup>+/-</sup> cells  
1011 (see A').

1012 B) Mosaic of *RpS18*<sup>+/-</sup> and *RpS18*<sup>+/+</sup> cells. p-eIF2 $\alpha$  levels were increased in *RpS18*<sup>+/-</sup>

1013 cells (see B'). C) Mosaic of *RpS3*<sup>+/-</sup> *Xrp1*<sup>+/-</sup> and *RpS3*<sup>+/+</sup> *Xrp1*<sup>-/-</sup> cells. p-eIF2 $\alpha$  levels were

1014 unaffected in *RpS3*<sup>+/-</sup> cells when *Xrp1* was mutated(see C'). D) Mosaic of *RpS17*<sup>+/-</sup> and

1015 *RpS17*<sup>+/+</sup> cells (the latter labeled more brightly, having two copies of  $\beta$ -gal transgene). p-

1016 eIF2 $\alpha$  levels were increased in *RpS17*<sup>+/-</sup> cells (see D'). E) Mosaic of *RpS17*<sup>+/-</sup> and

1017 *RpS17*<sup>+/+</sup> cells in an *Xrp1*<sup>+/-</sup> wing disc, (*RpS17*<sup>+/+</sup> labeled more brightly, having two

1018 copies of  $\beta$ -gal transgene).. p-eIF2 $\alpha$  levels were unaffected in *RpS17*<sup>+/-</sup> cells (see E').

1019 F) Labelled clones of cells expressing *Irpb18* RNAi in a *RpS17*<sup>+/-</sup> wing disc. p-eIF2 $\alpha$

1020 levels were reduced by *Irpb18* knock-down (see F'). G) Labelled clones of cells

1021 expressing *Irpb18* RNAi in a *RpS17*<sup>+/-</sup> wing disc. Translation rate was restored by

1022 *Irpb18* knock-down (see G'). H) Labelled cells over-expressing PPP1R15 in the

1023 posterior compartment of a *RpS3*<sup>+/-</sup> wing disc. p-eIF2 $\alpha$  levels were reduced by

1024 PPP1R15 over-expression (see H'). I). Labelled cells over-expressing PPP1R15 in the

1025 posterior compartment of a *RpS18*<sup>+/-</sup> wing disc. p-eIF2 $\alpha$  levels were reduced by

1026 PPP1R15 over-expression (see I'). J) Labelled cells expressing PERK RNAi in the

1027 posterior compartment of a *RpS3*<sup>+/-</sup> wing disc. p-eIF2 $\alpha$  levels were reduced by PERK

1028 knock-down (see J'). K). Labelled cells expressing PERK RNAi in the posterior

1029 compartment of a *RpS18*<sup>+/-</sup> wing disc. p-eIF2 $\alpha$  levels were reduced by PERK knock-

1030 down (see K'). L) Labelled clones of cells expressing PERK RNAi in a *RpS18*<sup>+/-</sup> wing

1031 disc. Translation rate was restored by PERK knock-down (see L').



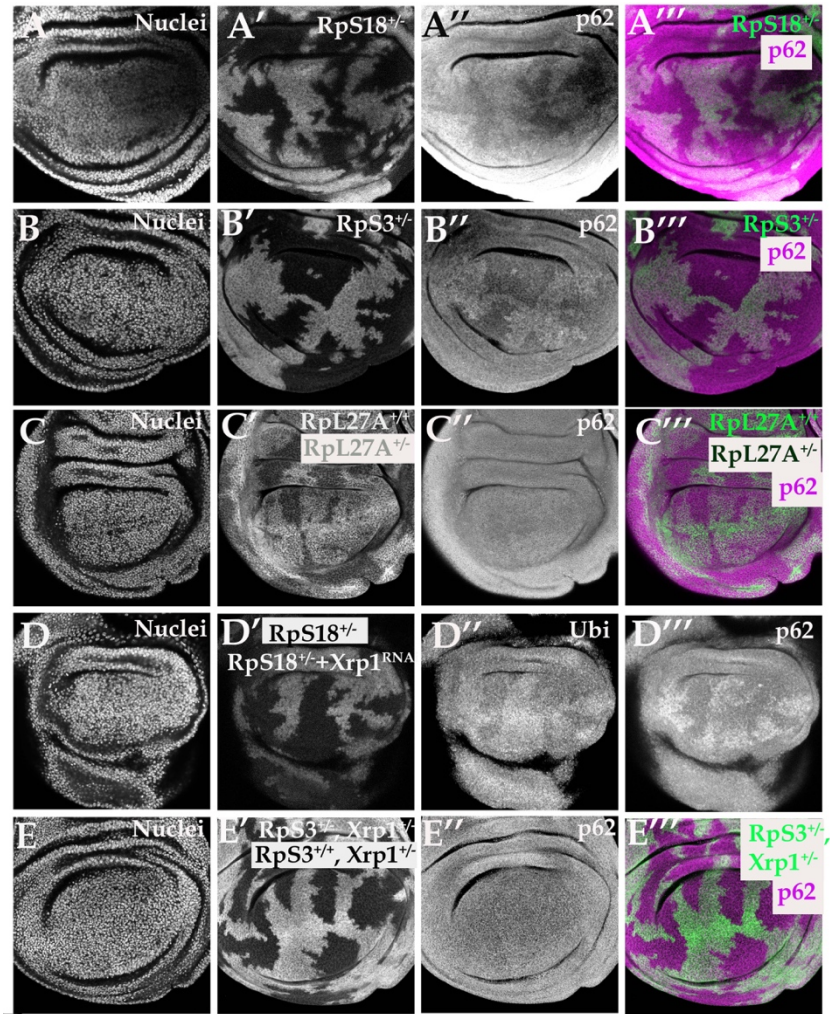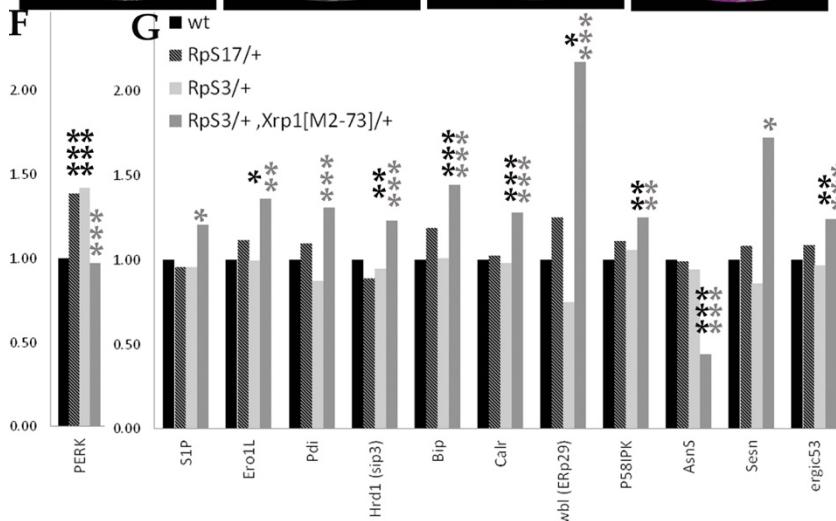

1032

1033 **Figure 4 Xrp1-dependent aggregates and gene expression changes in *RpS*<sup>+/-</sup>**

1034 **cells.**



1035 Panels A-E show single confocal planes from third instar wing imaginal discs, mosaic  
1036 for the genotypes indicated. In all cases the plane passes through the central nuclei-  
1037 containing disk portion for the genotypes shown. A) p62 was higher in *RpS18<sup>+/-</sup>* cells  
1038 than *RpS18<sup>+/+</sup>* cells. B) p62 was higher in *RpS3<sup>+/-</sup>* cells than *RpS3<sup>+/-</sup>* cells. C) p62  
1039 was comparable in *RpL27A<sup>+/-</sup>* cells and *RpL27A<sup>+/+</sup>* cells. D) Labelled clones of cells  
1040 expressing Xrp1-RNAi in a *RpS18<sup>+/-</sup>* wing disc. Levels of both p62 and ubiquitinated  
1041 proteins were reduced by Xrp1 knock-down. E) Mosaic of *RpS3<sup>+/-</sup>* and *RpS3<sup>+/+</sup>* cells in  
1042 *Xrp1<sup>+/-</sup>* wing disc. No increase in p62 was seen in *RpS3<sup>+/-</sup>* cells (compare panel B). F)  
1043 PERK mRNA levels (fold changes in mRNA-seq replicates relative to the wild-type  
1044 controls according to Deseq2) for the indicated genotypes. PERK mRNA was  
1045 increased in both *RpS17<sup>+/-</sup>* and *RpS3<sup>+/-</sup>* wing discs but not *RpS3<sup>+/-</sup>*, *Xrp1<sup>M2-73/+</sup>* cells. G)  
1046 mRNA levels for 11 genes participating in the Unfolded Protein Response. All were  
1047 significantly affected only in the *RpS3<sup>+/-</sup>* *Xrp1<sup>M2-73/+</sup>* genotype. Statistics: Asterisks  
1048 indicate statistical significance determined by Deseq2 (\*:  $p_{adj} < 0.05$ , \*\*:  $p_{adj} < 0.005$ , \*\*\*:  
1049  $p_{adj} < 0.0005$ ) compared to wild type control (black asterisks) or to *RpS3<sup>+/-</sup>* genotype  
1050 (grey asterisks). Comparisons not indicated were not significant ie  $p_{adj} \geq 0.05$  eg *PERK*  
1051 mRNA in *RpS3<sup>+/-</sup>* *Xrp1<sup>M2-73/+</sup>* compared to wild type control. Further data relevant to  
1052 this Figure are shown in Figure 4 Supplement 1. Data are based on mRNA-sequencing  
1053 of 3 biological replicates for each genotype.  
1054

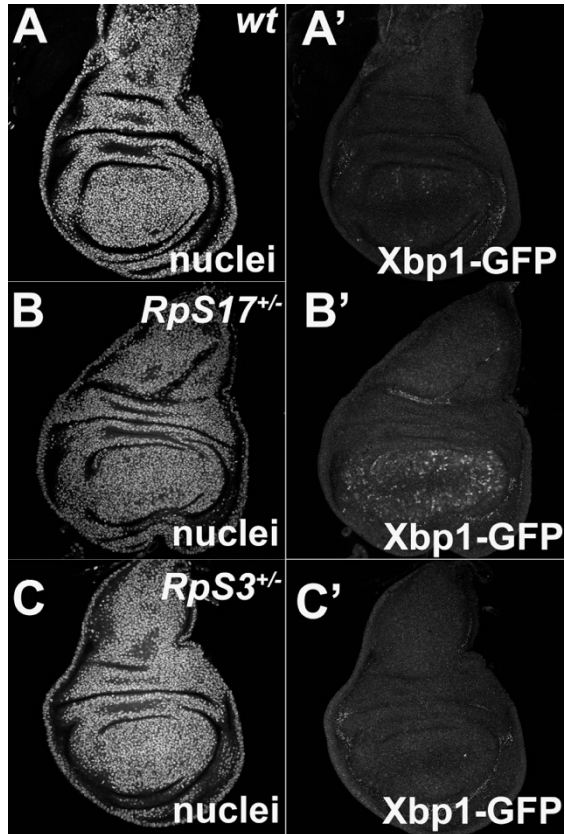

1055

1056 **Figure 4 Supplement 1. Little UPR detected in  $Rp^{+/-}$  wing discs.**

1057 Panels show single confocal planes from third instar wing imaginal discs expressing the  
1058 UPR reporter UAS-Xbp1-GFP in the wing pouch under *nub-Gal4* control. GFP

1059 expression indicates an unfolded protein response. A). Little evidence for UPR in wild

1060 type wing discs. B) Elevated UPR in  $RpS17^{+/-}$  wing discs. C) Little evidence for UPR in

1061  $RpS3^{+/-}$  wing discs.

1062

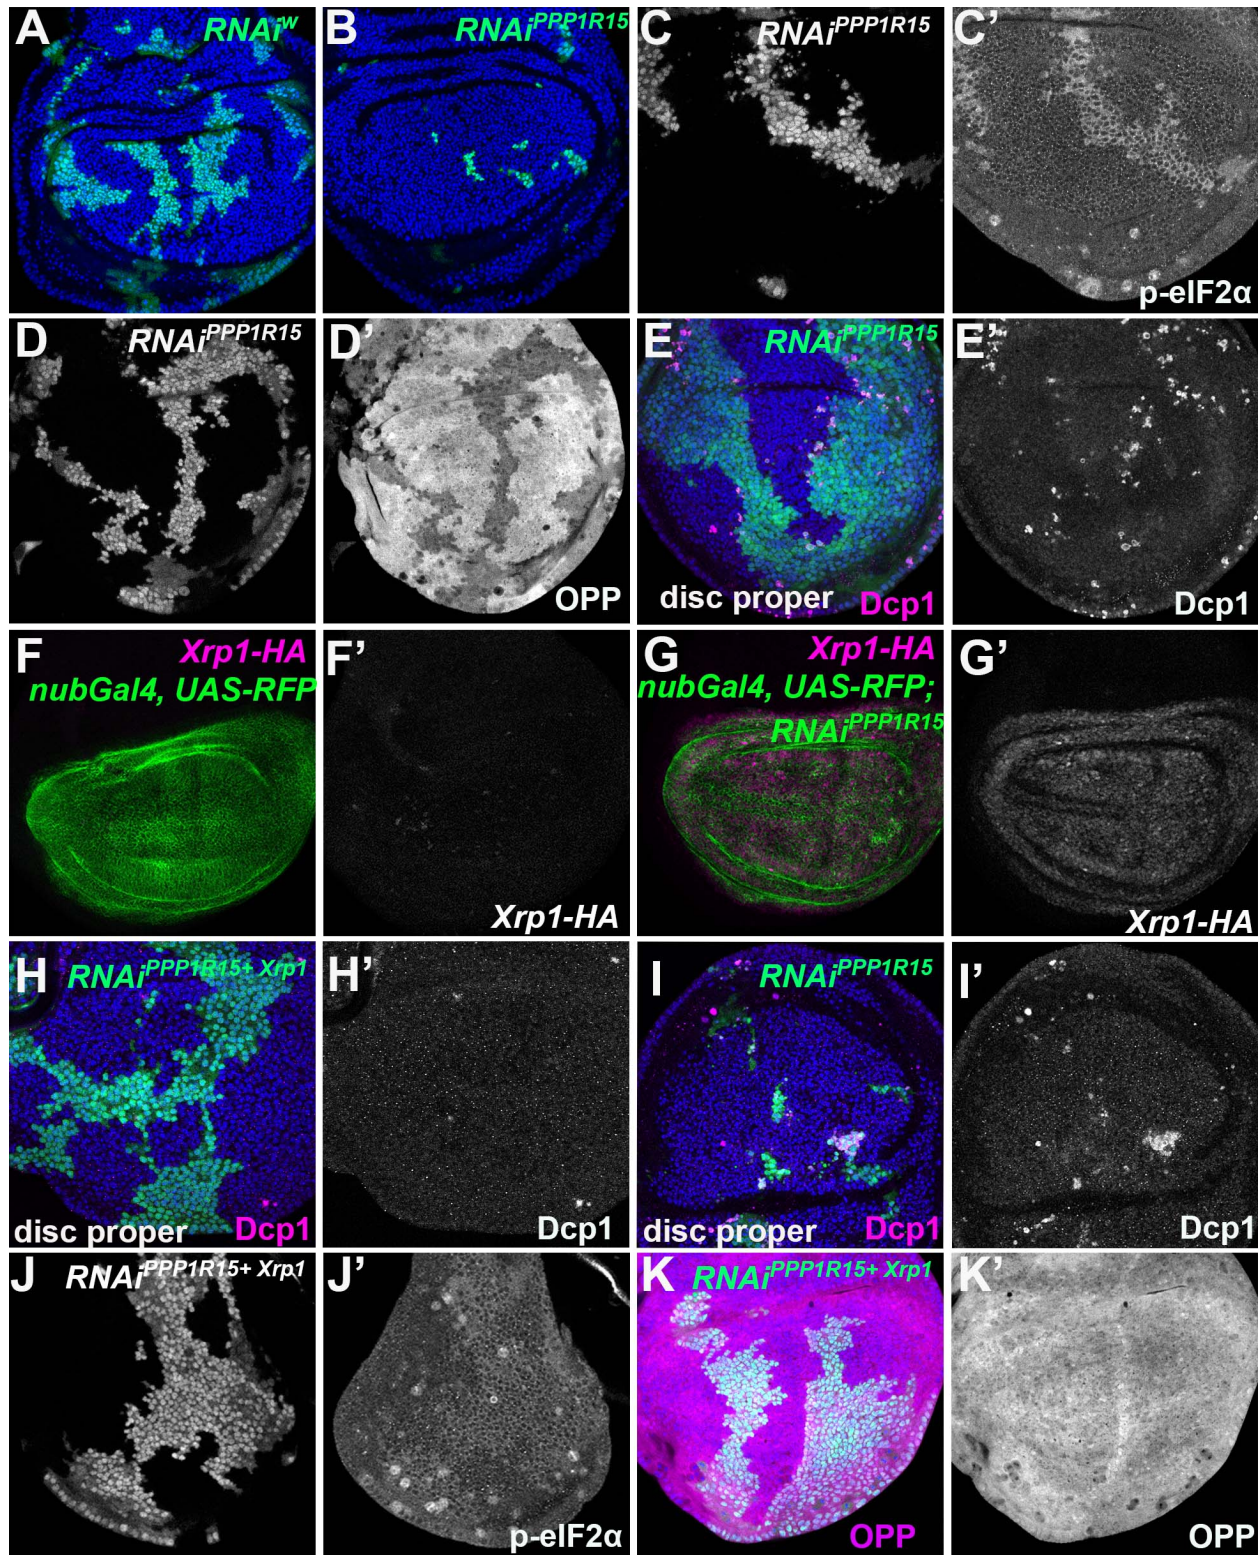

1063

1064 **Figure 5 eIF2α phosphorylation induces Xrp1 expression and cell competition**

1065 All panels show single confocal planes from third instar wing imaginal discs, mosaic for

1066 the genotypes indicated. All the sections pass through the central region of the disc



1067 proper containing nuclei in all genotypes, as indicated by the DNA stain in blue in some  
1068 panels. A) Labelled clones expressing *white* RNAi. Clones induced by 7 min heat  
1069 shock. B) Labelled clones expressing *PPP1R15* RNAi were fewer and smaller than the  
1070 control (compare panel A). Clones induced by 7 min heat shock. C) Labelled clones  
1071 expressing *PPP1R15* RNAi contain phosphorylated eIF2 $\alpha$  (see C'). D) Clones induced  
1072 by 25 $\pm$ 525 min heat shock, which results in larger clone areas. Labelled clones  
1073 expressing *PPP1R15* RNAi reduced translation rate (see D'). E) Labelled clones  
1074 expressing *PPP1R15* RNAi (green) underwent competitive apoptosis at interfaces with  
1075 wild type cells (activated caspase Dcp1 in magenta; see also E'). F) *Nub-Gal4* drives  
1076 gene expression in the wing pouch, shown in green for RFP, with little expression of  
1077 Xrp1-HA (magenta; see also F'). G) *PPP1R15* RNAi induces Xrp1-HA expression in the  
1078 wing pouch (magenta; see also G'). H) Labelled clones co-expressing *PPP1R15* RNAi  
1079 and *Xrp1* RNAi (green) lacked competitive apoptosis (activated caspase Dcp1 in  
1080 magenta; see also H'). I) Labelled clones expressing *PPP1R15* RNAi (green).  
1081 Experiment performed in parallel to panel H. Note competitive apoptosis at interfaces  
1082 with wild type cells (activated caspase Dcp1 in magenta; see also I'), and smaller clone  
1083 size. Cell death at the basal surface of the same disc shown in Figure 5-Supplement 1F  
1084 J) Labelled clones co-expressing *PPP1R15* RNAi and *Xrp1* RNAi (green) showed less  
1085 eIF2 $\alpha$  phosphorylation than for *PPP1R15* RNAi alone (compare panel C). Sample  
1086 prepared in parallel to panel C (in the same tube from fixation to staining). K) *Xrp1*  
1087 knock-down restored normal translation rate to cell clones expressing *PPP1R15* RNAi  
1088 (see also K'). Sample prepared in parallel to panel D (in the same tube from fixation to  
1089 staining). Additional data relevant to this Figure is shown in Figure 5 Supplement 1.  
1090

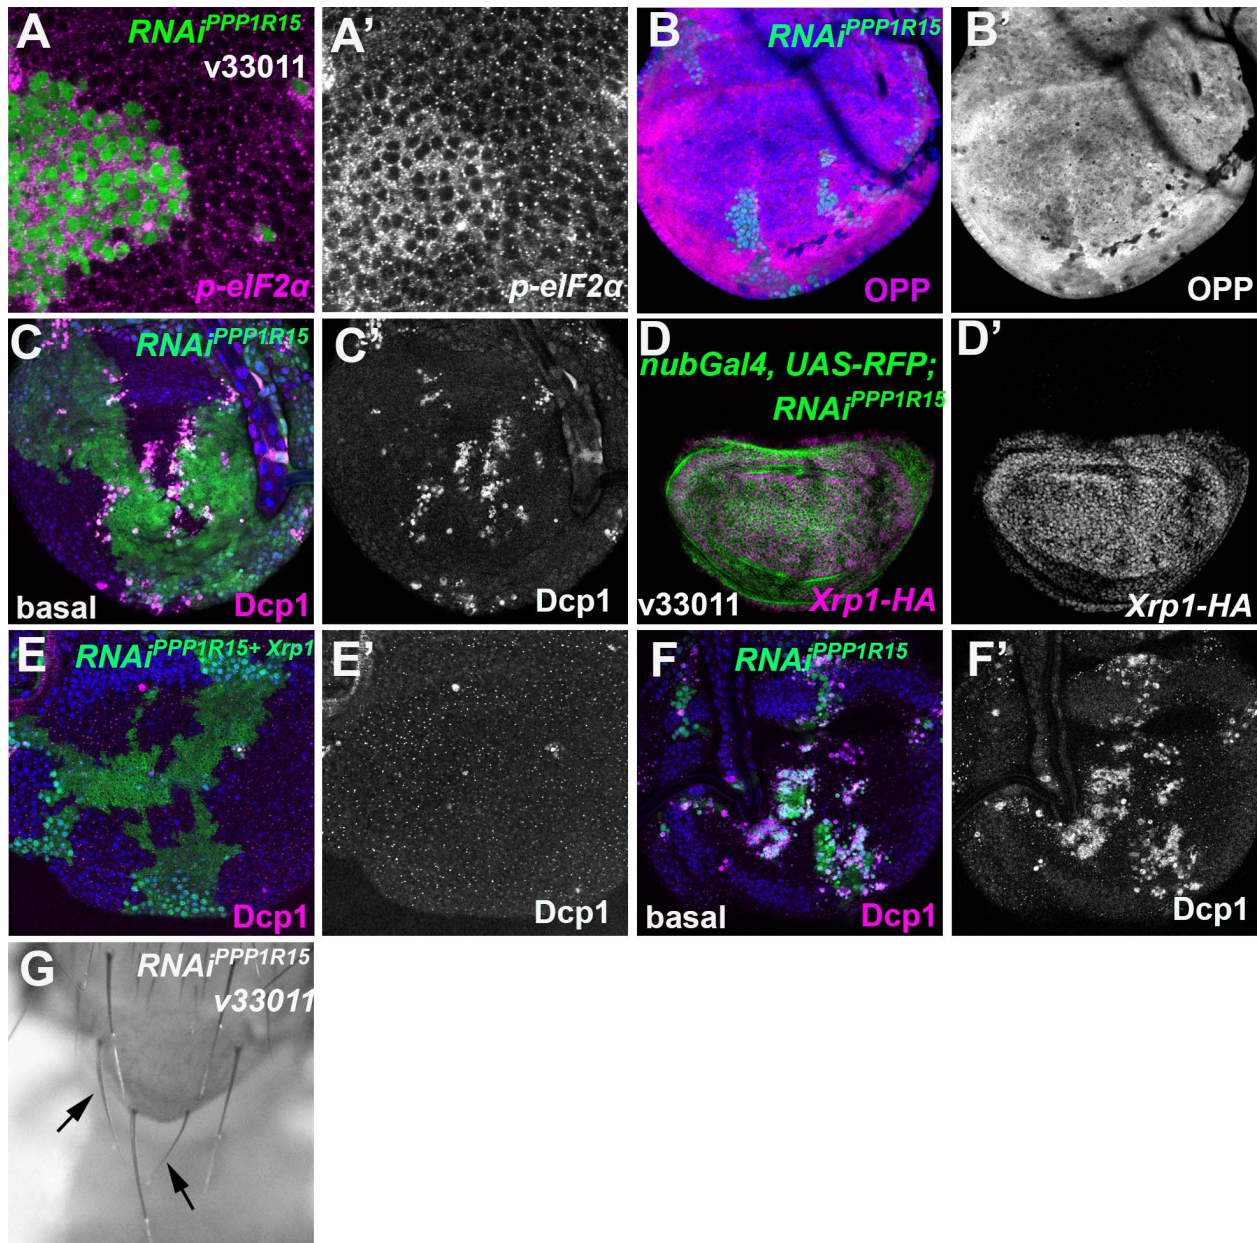

1091

1092 **Figure 5 Supplement 1. eIF2 $\alpha$  phosphorylation induces Xrp1 expression, cell**  
1093 **competition, and small bristles**

1094 Single confocal planes from third instar wing imaginal discs.

1095 A) Clones expressing PPP1R15-RNAi had increased p-eIF2 $\alpha$  levels (A'). B) Clones

1096 expressing PPP1R15-RNAi had reduced translation (OPP) (B'). C) Basal section of the

1097 same disc shown in Figure 5E. More dying PPP1R15-RNAi cells labeled for active

1098 caspase (magenta, see also C') accumulate basally at the boundaries with the wild type

1099 cells. D) *nub-Gal4* driving *PPP1R15* RNAi in the wing pouch (green) led to Xrp1-HA

1100 expression (magenta; see also D'). E) Basal confocal section of the wing disc also  
1101 shown in Figure 5H, mosaic for cells expressing *PPP1R15* RNAi and Xrp1 RNAi  
1102 (green). Even at these basal levels, apoptosis was almost completely rescued by Xrp1  
1103 knockdown (magenta, see also E'). F) Basal confocal section of wing disc mosaic for  
1104 wild type cells and cells expressing *PPP1R15* RNAi also shown in Figure 5I, a parallel  
1105 control to panel E. Note extensive cell death basally (magenta, see also F'), as well as  
1106 smaller clone size (green). G) Minute-like short, thin bristles (arrows) on adults when  
1107 *PPP1R15* was depleted in clones contrast with the normal contralateral bristles.  
1108



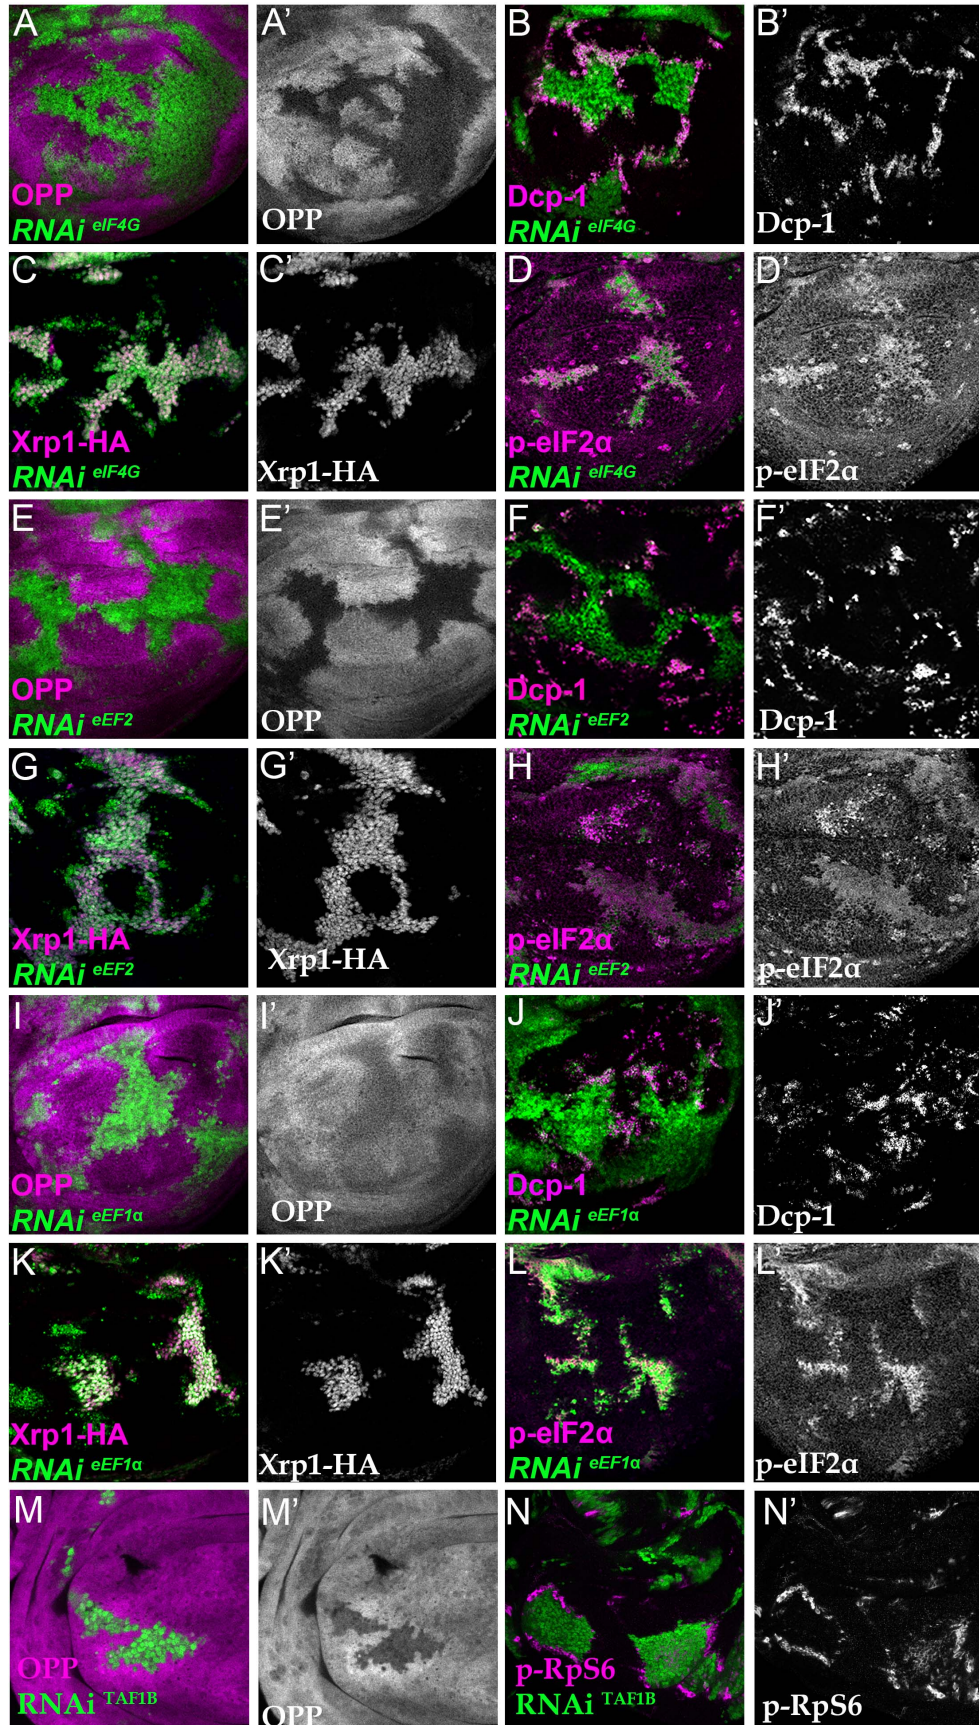



1110 **Figure 6 Depletion of translation factors induces Xrp1 expression, eIF2 $\alpha$**   
1111 **phosphorylation, reduced translation, and cell competition**

1112 Clones of cells depleted for translation factors are labelled in green. In each case,  
1113 translation factor depletion reduced translation rate, resulted in competitive cell death at  
1114 interfaces with wild type cells, induced Xrp1-HA expression, and led to eIF2 $\alpha$   
1115 phosphorylation. Translation rate, dying cells (activated caspase Dcp1), Xrp1-HA and  
1116 p-eIF2 $\alpha$  are indicated in magenta and in separate channels as labelled. A-D) Clones  
1117 expressing RNAi for eIF4G. E-H) Clones expressing RNAi for eEF2. I-L) Clones  
1118 expressing RNAi for eEF1 $\alpha$ . In all cases (panels A,E,I), wild type cells near to cells  
1119 depleted for translation factors show higher translation rate than other wild type cells.  
1120 M) Clones of cells depleted for TAF1B (green) also showed a cell-autonomous  
1121 reduction in translation rate and non-autonomous increase in nearby wild type cells  
1122 (translation rate in magenta, see also M'). N) Clones of cells depleted for TAF1B  
1123 (green) showed a non-autonomous increase in RpS6 phosphorylation in nearby cells  
1124 (magenta, see also N'). Additional data relevant to this Figure is shown in Figure 6  
1125 Supplement 1 and Figure 6 Supplement 2.  
1126

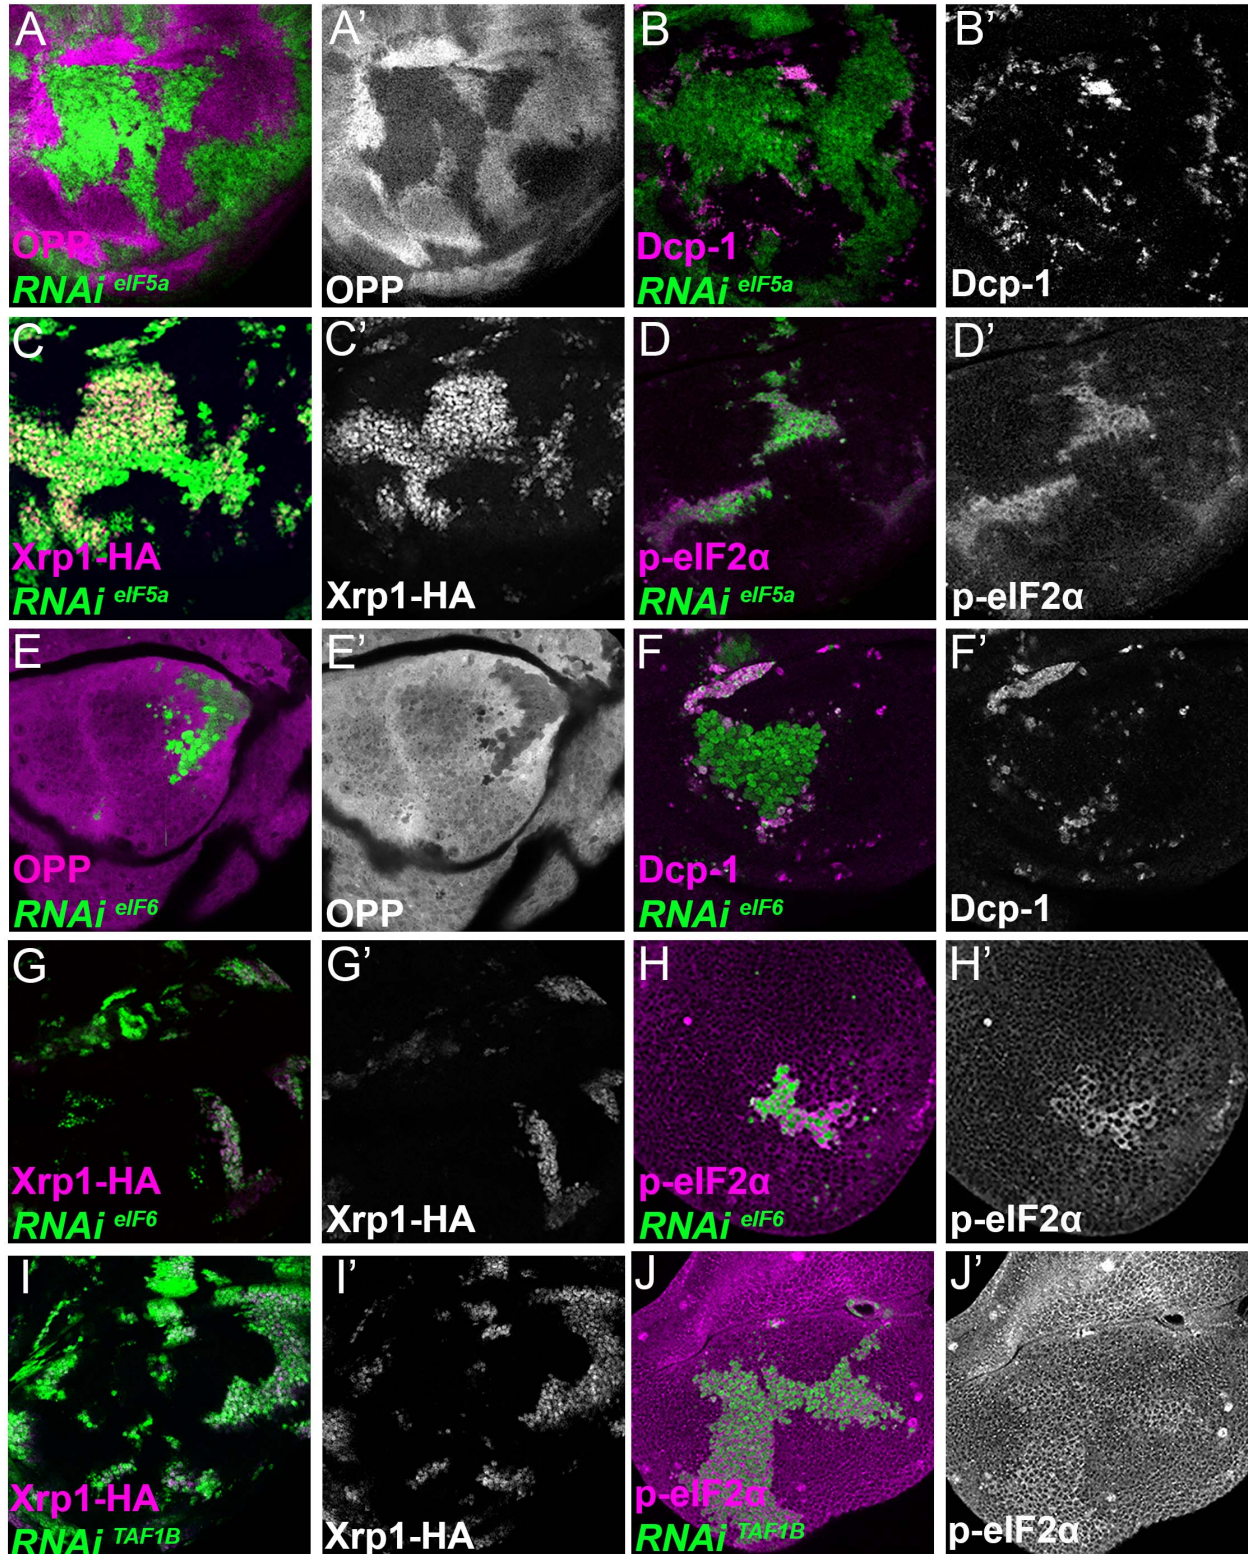

1127

1128

1129

Figure 6 Supplement 1. Xrp1 expression, eIF2 $\alpha$  phosphorylation, reduced translation, and cell competition after depletion of additional translation factors.

1130 Clones of cells depleted for translation factors are shown in green. In each case,  
1131 translation factor depletion reduced translation rate, resulted in competitive cell death at  
1132 interfaces with wild type cells, induced Xrp1-HA expression, and led to eIF2 $\alpha$   
1133 phosphorylation. Translation rate, dying cells (activated caspase Dcp1), Xrp1-HA and  
1134 p-eIF2 $\alpha$  are indicated in magenta and in separate channels as labelled. A-D) Clones  
1135 expressing RNAi for eIF5A. E-H) Clones expressing RNAi for eIF6. I,J) Clones  
1136 expressing RNAi for TAF1B.  
1137  
1138



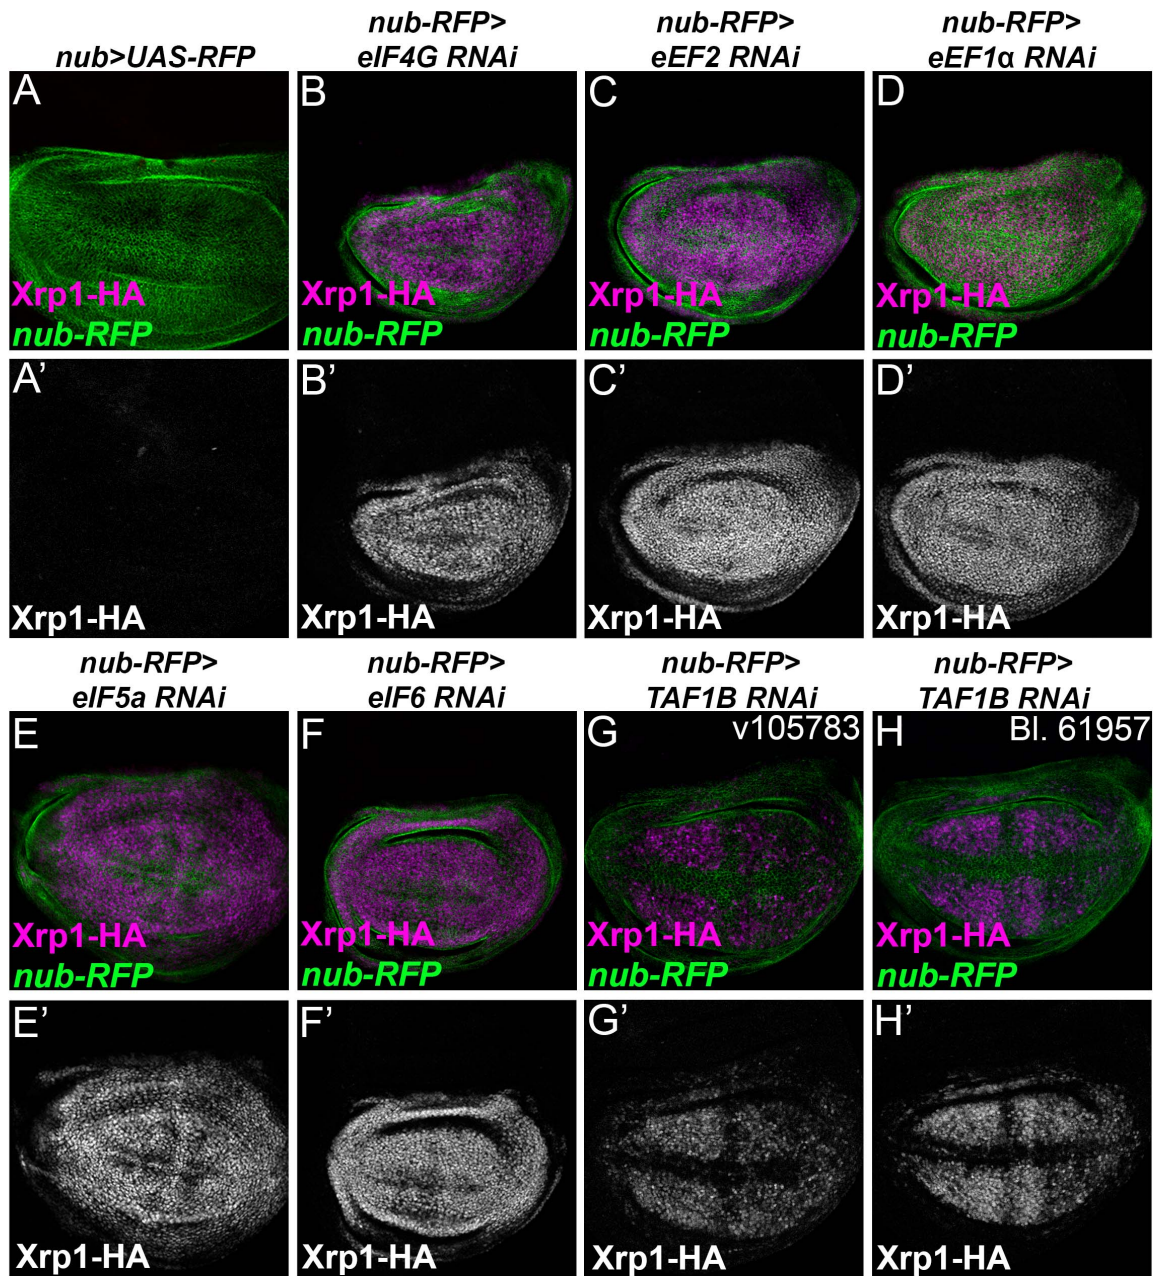

1139

1140 **Figure 6 Supplement 2 Translation factor knock-down induces Xrp1 expression.**

1141 Knock down of translation factors using nub-Gal4 to drive RNAi in the wing pouch  
1142 (green) induced Xrp1-HA expression (magenta, and separate channels as indicated).

1143 A) In the control of nub-Gal4 expressing RFP alone, negligible Xrp1-HA was detected

1144 (see A'). B) eIF4G-RNAi. C) eEF2- RNAi. D) eEF1α1-RNAi. E) eIF5A-RNAi. F) eIF6-

1145 RNAi. G) TAF1B-RNAi H) TAF1B-RNAi.



1146

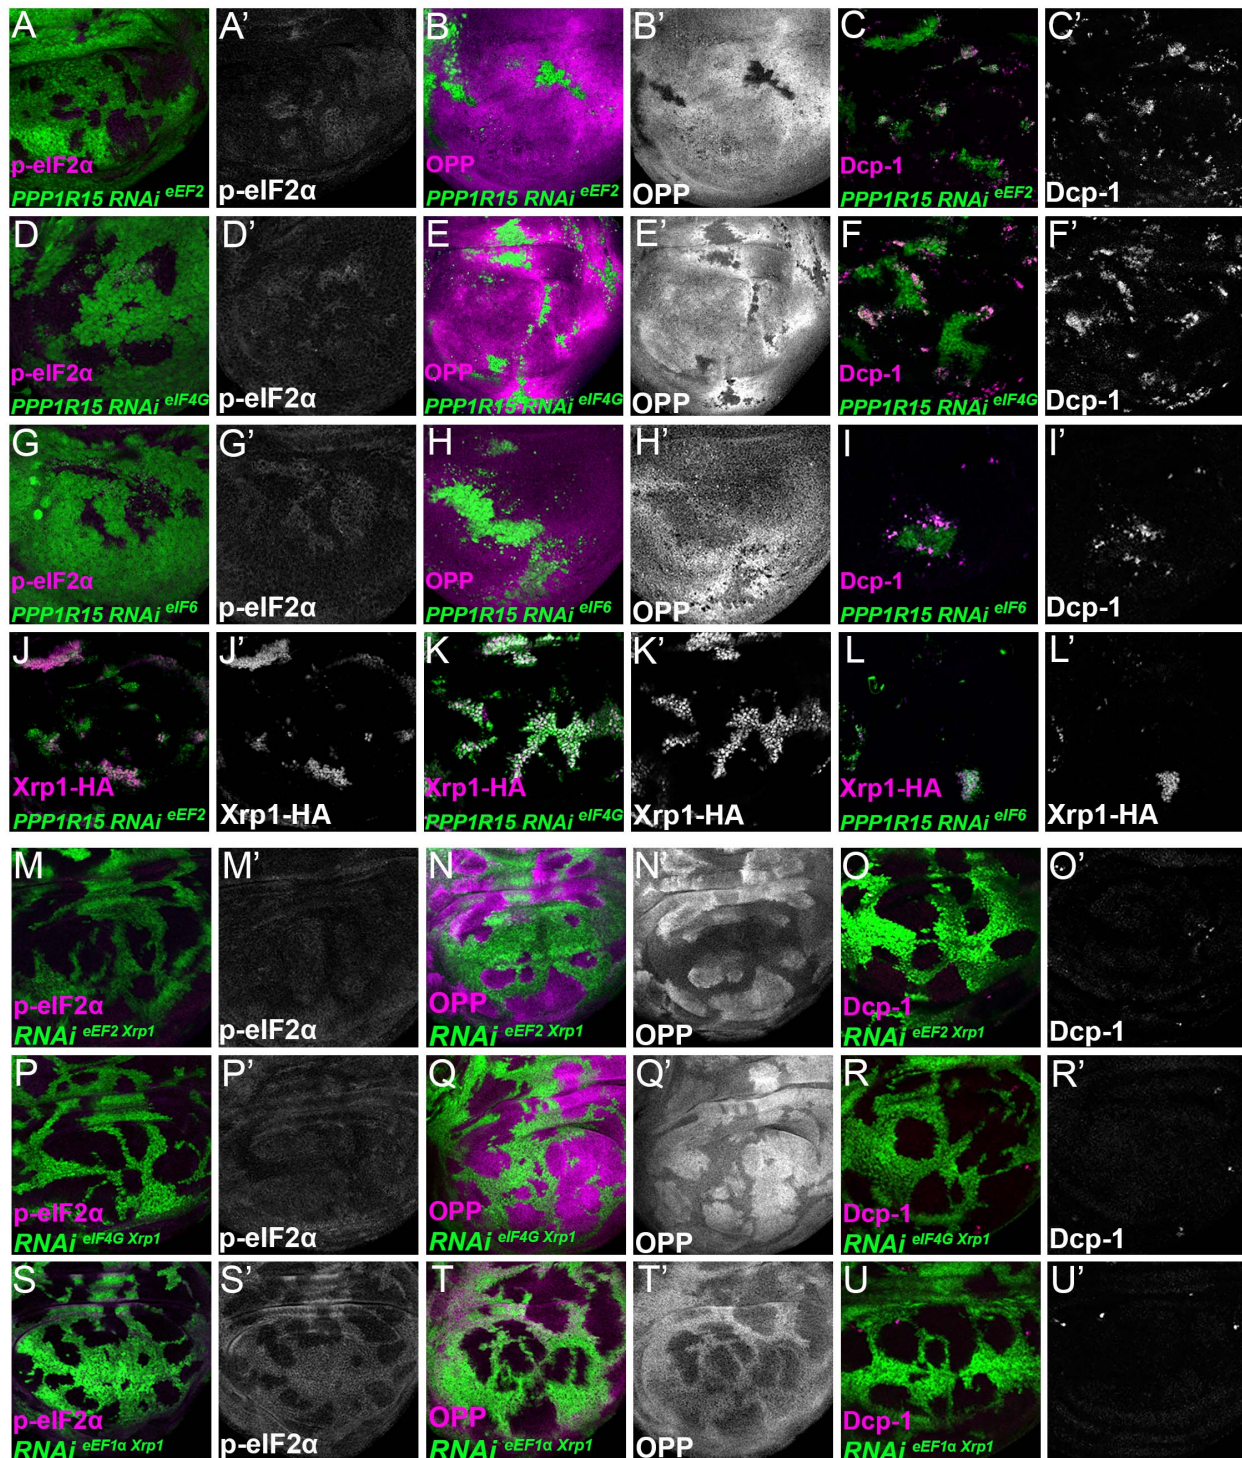

1147

1148

1149

**Figure 7 Interrupting the translation cycle activates Xrp1-dependent cell competition, independently of diminished translation**

1150 Single confocal planes from third instar wing imaginal discs. p-eIF2 $\alpha$  levels, translation  
1151 rate (ortho-propargyl puromycin), dying cells (activated caspase Dcp1) and Xrp1-HA are  
1152 indicated in magenta and in separate channels as labelled. (A-L) Clones of cells  
1153 depleted for translation factors which also overexpress PPP1R15 are shown in green. In  
1154 each case, PPP1R15 overexpression was sufficient to reduce eIF2 $\alpha$  phosphorylation to  
1155 near control levels (or even lower), but it did not restore normal translation rates, did not  
1156 affect Xrp1-HA levels and did not reduce competitive cell death. A-C) Clones co-  
1157 expressing PPP1R15 and RNAi for eEF2. D-F) Clones co-expressing PPP1R15 and  
1158 RNAi eIF4G. G-I) Clones co-expressing PPP1R15 and RNAi for eIF6. J-K) Xrp1-HA  
1159 expression (magenta) in clones co-expressing PPP1R15 and RNAi for eEF2 (J), eIF4G  
1160 (K), or eIF6 (L). (M-U) Clones of cells depleted for translation factors which also  
1161 express Xrp1-RNAi are shown in green. (M-O) Clones depleted for Xrp1 as well as  
1162 eEF2 expressed phospho-eIF2 $\alpha$  at near to control levels, only partially restored overall  
1163 translation rate, but lacked competitive cell death. (P-R) Clones depleted for Xrp1 as  
1164 well as eIF4G expressed phospho-eIF2 $\alpha$  at near to control levels, only partially restored  
1165 overall translation rate, but lacked competitive cell death. (S-U) Clones depleted for  
1166 Xrp1 as well as eEF1 $\alpha$ 1 retained high levels of eIF2 $\alpha$  phosphorylation but actually  
1167 showed a global translation rate higher than wild type cells. They lacked competitive  
1168 cell death.  
1169  
1170



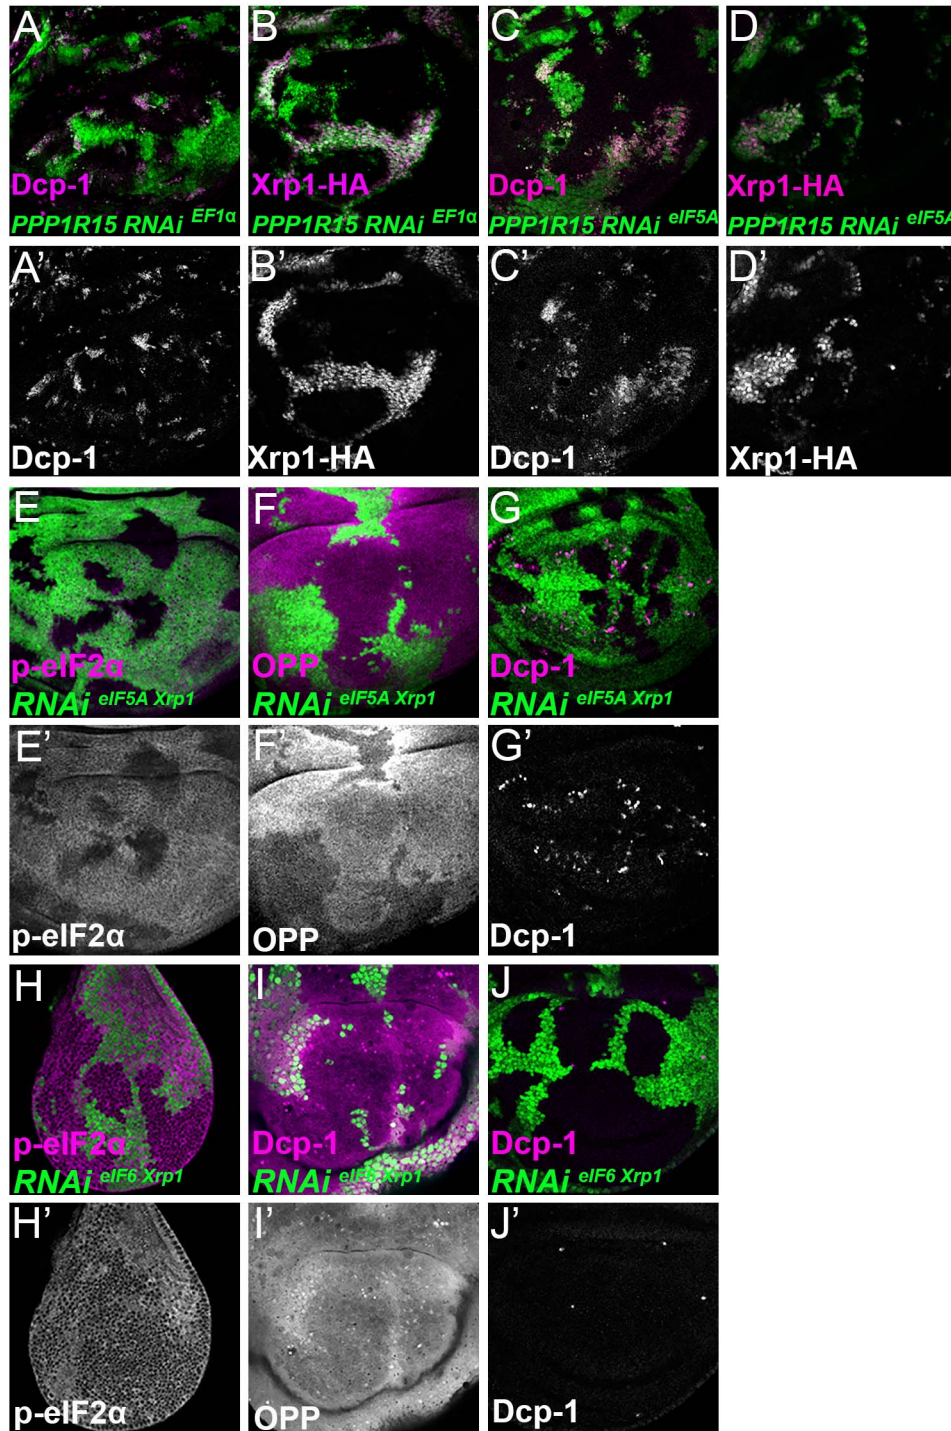

1171

### 1172 Figure 7 Supplement 1

1173 Single confocal planes from third instar wing imaginal discs. p-eIF2α levels, translation  
1174 rate (ortho-propargyl puromycin), dying cells (activated caspase Dcp1) and Xrp1-HA are  
1175 indicated in magenta and in separate channels as labelled. (A-D) Clones of cells  
1176 depleted for translation factors which also overexpress PPP1R15 are shown in green.



1177 PPP1R15 overexpression did not reduce Xrp1-HA levels or rescue competitive cell  
1178 death in the cells depleted for eEF1 $\alpha$  (A,B) or eIF5A (C,D). (E-G) Clones of cells  
1179 depleted eIF5A that also express RNAi for Xrp1 are shown in green. Xrp1-depletion did  
1180 not reduce eIF2 $\alpha$  phosphorylation or restore translation levels, but it reduced levels of  
1181 competitive cell death (compare panel C and Figure 6B) (H-J) Clones of cells depleted  
1182 eIF6 that also express RNAi for Xrp1 are shown in green. Xrp1 depletion in cells  
1183 expressing eIF6 reduced eIF2 $\alpha$  phosphorylation and rescued competitive cell death.  
1184 Translation rates were restored at least to wild type levels.  
1185

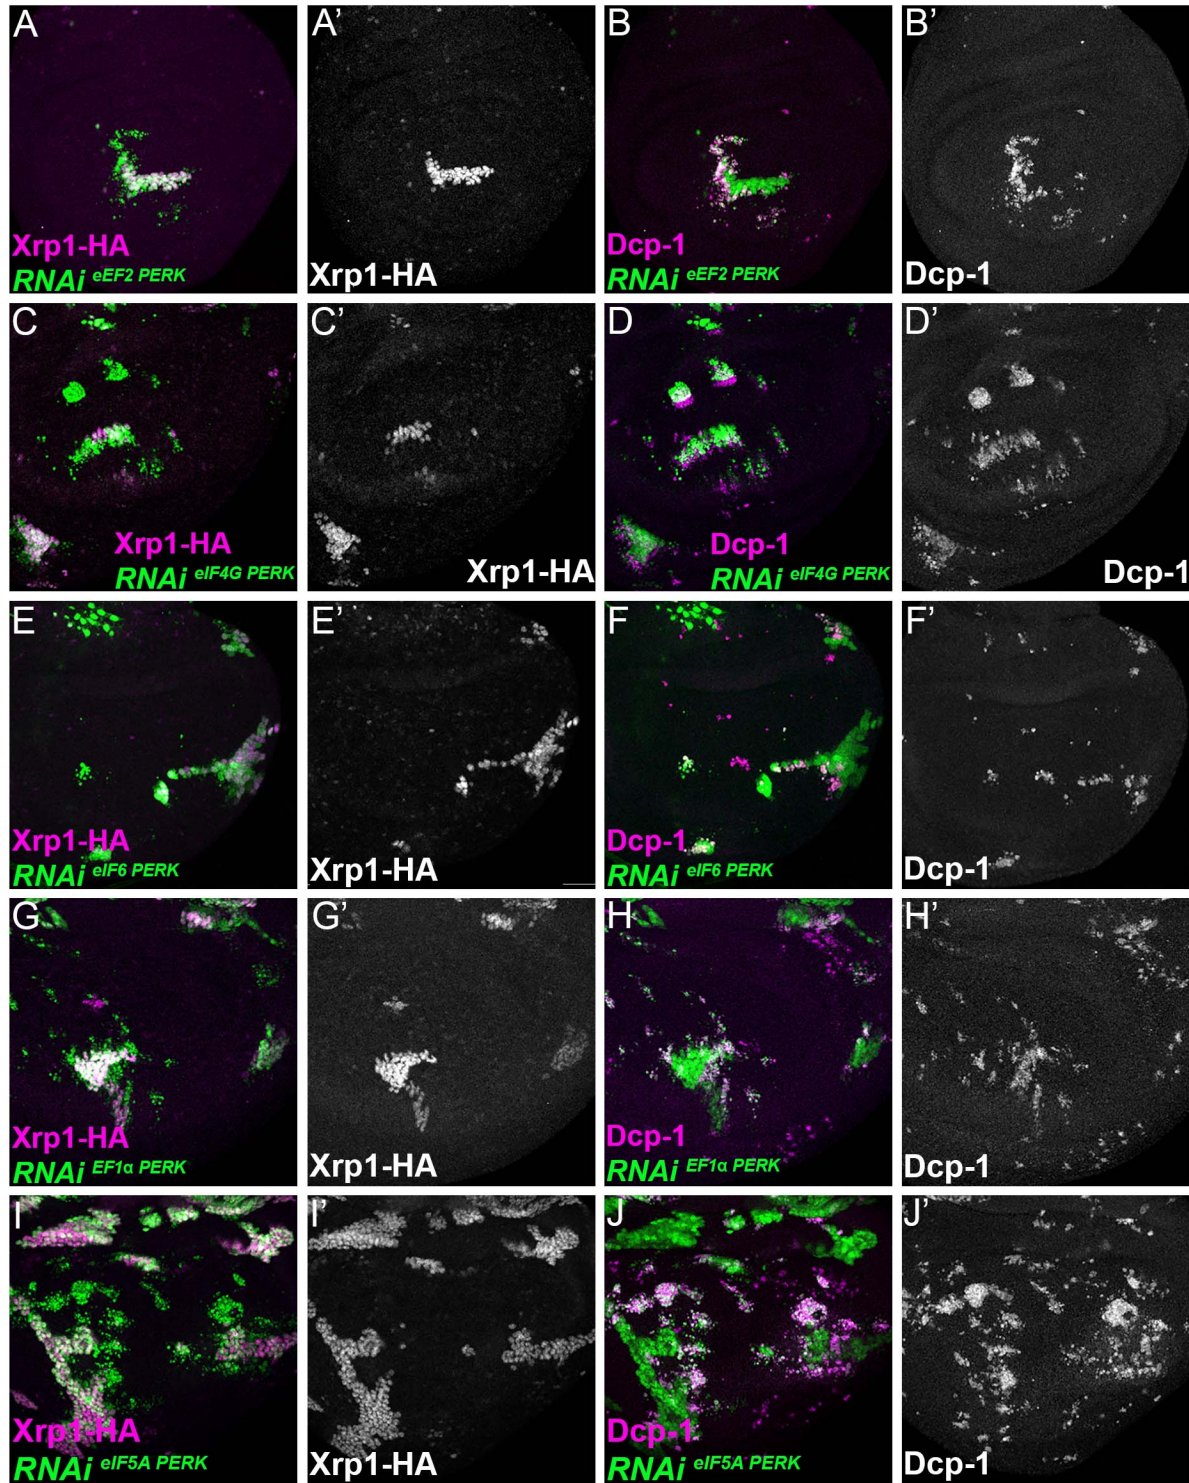

1186

1187 **Figure 7 Supplement 2**

1188 Single confocal planes from third instar wing imaginal discs. Dying cells (activated  
1189 caspase Dcp1) and Xrp1-HA are indicated in magenta and in separate channels as  
1190 labelled. Clones of cells depleted for translation factors which also overexpress PERK-

1191 RNAi are shown in green. In no case did PERK depletion affect Xrp1-HA induction or  
1192 suppress competitive cell death. A,B) Clones expressing RNAi for both eEF2 and  
1193 PERK. C,D) Clones expressing RNAi for both eIF4G and PERK. E,F) Clones  
1194 expressing RNAi for both eIF6 and PERK. G,H) Clones expressing RNAi for both  
1195 eEF1 $\alpha$ 1 and PERK. I,J). Clones expressing RNAi for both eIF5A and PERK.  
1196  
1197

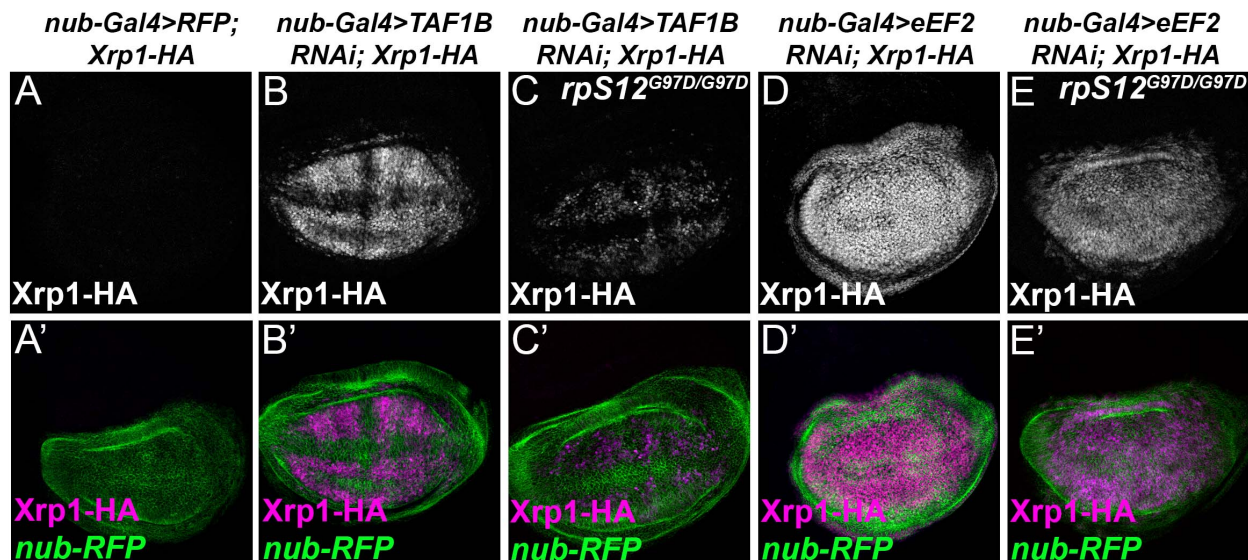

1198

1199 **Figure 8 RpS12-dependence of Xrp1 expression.**

1200 Figures show projections of Xrp1-HA expression from the wing discs of indicated  
1201 genotypes. A) Negligible Xrp1-HA (magenta in A') was expressed in control discs  
1202 where *nub-Gal4* drove only reporter RFP expression in the wing pouch (green in A'-E').  
1203 B) TAF1B knockdown resulted in Xrp1-HA expression (magenta in B'). C) Xrp1-HA  
1204 expression was greatly reduced when TAF-1B was knocked-down in the *rpS12*<sup>G97D</sup>  
1205 background (see also magenta in C'). D) eEF2 knockdown resulted in strong Xrp1-HA  
1206 expression (magenta in D'). E) Xrp1-HA expression was only moderately reduced  
1207 when eEF2 was knocked-down in the *rpS12*<sup>G97D</sup> background (see also magenta in E').  
1208



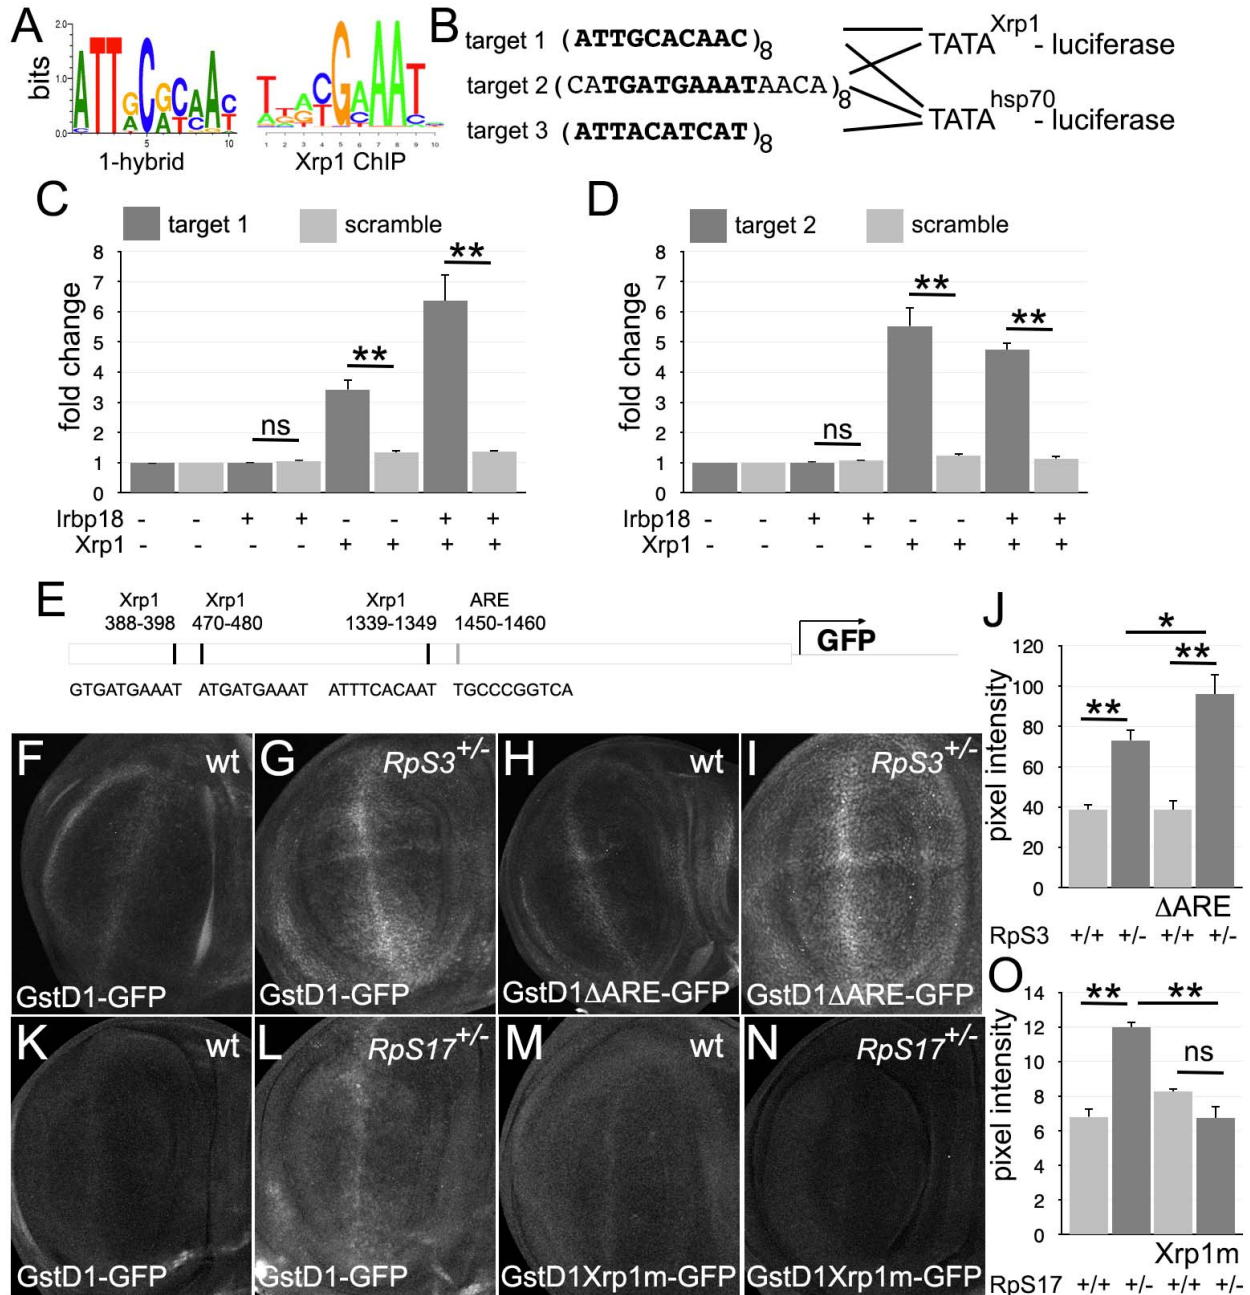

1209

1210

### Figure 9 Transcriptional regulation by Xrp1.

1211

A) Similar consensus binding site of Xrp2/lrbp18 defined by bacterial 1-hybrid

1212

studies(Zhu et al., 2011) and by Xrp1 ChIP from *Drosophila* eye imaginal discs

1213

overexpressing an Xrp1-HA protein(Baillon et al., 2018). B) Xrp1 binding motif

1214

sequences multimerized in luciferase reporter plasmids upstream of transcription

1215

start sites from the *Xrp1* gene or from the *hsp70* gene. Targets 1 and 3 were

1216

based on the 1-hybrid consensus, target 2 is the P element sequence footprinted

1217 by Xrp1-Irbp18(Francis et al., 2016). The match to the consensus sites is shown  
1218 in bold type. C) Luciferase assays following transfection of reporters and protein  
1219 expression plasmids into S2 cells. The target 1-TATA<sup>Xrp1</sup> reporter showed  
1220 sequence-specific activation by transfected Xrp1. Transfected Irbp18 alone had  
1221 no effect, but synergized with Xrp1. Exact p-values for comparisons between  
1222 target 1 reporters and scrambled reporters were: Padj=6.16, Padj=0.00827,  
1223 Padj=3.47x10<sup>-7</sup> respectively. D) Luciferase assays following transfection of  
1224 reporters and protein expression plasmids into S2 cells. The target 2-TATA<sup>Xrp1</sup>  
1225 reporter showed sequence-specific activation by transfected Xrp1. Transfected  
1226 Irbp18 alone had no effect. Exact p-values for comparisons between target 2  
1227 reporters and scrambled reporters were: Padj=4.21, Padj=2.00x10<sup>-8</sup>,  
1228 Padj=1.96x10<sup>-7</sup> respectively. E) Potential regulatory sequences in the 2.7kb  
1229 upstream intergenic fragment used in the GstD1-GFP reporter(Brown et al.;  
1230 Sykiotis & Bohmann, 2008). 3 Xrp1-binding motifs and the antioxidant response  
1231 element (ARE) are indicated. F-I) and K-N) show projections from the central  
1232 disc-proper regions of wing discs expressing reporter transgenes in the indicated  
1233 genetic backgrounds. F) baseline GstD1-GFP expression in the wild type wing  
1234 disc. G) Elevated GstD1-GFP expression in the *RpS3<sup>+/-</sup>* wing disc. H) baseline  
1235 GstD1ΔARE-GFP expression in the wild type wing disc. I) Elevated  
1236 GstD1ΔARE-GFP expression in the *RpS3<sup>+/-</sup>* wing disc. J) Quantification of these  
1237 results. Average pixel intensity from wing pouch regions was measured. Mean ±  
1238 SEM from multiple samples is shown. N=5 for each genotype. Exact P values  
1239 were: for GstD1-GFP in *RpS3<sup>+/-</sup>* compared to *RpS3<sup>+/+</sup>*, Padj=0.00257; for  
1240 GstD1ΔARE-GFP in *RpS3<sup>+/-</sup>* compared to *RpS3<sup>+/+</sup>*, Padj=2.55x10<sup>-5</sup>; for GstD1-  
1241 GFP in *RpS3<sup>+/+</sup>* compared to GstD1ΔARE-GFP in *RpS3<sup>+/+</sup>*, Padj=0.993; for  
1242 GstD1-GFP in *RpS3<sup>+/-</sup>* compared to GstD1ΔARE-GFP in *RpS3<sup>+/-</sup>*, Padj=0.0313.  
1243 K) baseline GstD1-GFP expression in the wild type wing disc. L) Elevated  
1244 GstD1-GFP expression in the *RpS17<sup>+/-</sup>* wing disc. M) baseline expression of  
1245 GstD1-GFP with all 3 Xrp1-binding motifs mutated in the wild type wing disc. N)  
1246 Expression of GstD1-GFP with all 3 Xrp1-binding motifs mutated was similar in  
1247 the *RpS17<sup>+/-</sup>* wing disc to the wild type control. O) Quantification of these results.



1248 Average pixel intensity from wing pouch regions was measured. Mean  $\pm$  SEM  
 1249 from multiple samples is shown. N=5,6,5,6 for respective samples. Exact P  
 1250 values were: for GstD1-GFP in *RpS3<sup>-/-</sup>* compared to *RpS3<sup>+/+</sup>*,  $P_{adj}=2.34 \times 10^{-6}$ ; for  
 1251 GstD1mXrp1-GFP in *RpS3<sup>-/-</sup>* compared to *RpS3<sup>+/+</sup>*,  $P_{adj}=0.116$ ; for GstD1-GFP  
 1252 in *RpS3<sup>+/+</sup>* compared to GstD1mXrp1-GFP in *RpS3<sup>+/+</sup>*,  $P_{adj}=0.112$ ; for GstD1-  
 1253 GFP in *RpS3<sup>-/-</sup>* compared to GstD1mXrp1-GFP in *RpS3<sup>-/-</sup>*,  $P_{adj}=1.19 \times 10^{-6}$ . K)  
 1254 baseline GstD1-GFP expression in the wild type wing disc. Statistics: 1-way  
 1255 ANOVA with Bonferroni-Holm correction for multiple testing was performed for  
 1256 the data shown in panels C,D,J,O. Data in panel C,D were based on triplicate  
 1257 measurements from each of 3 biological replicates for each transfection.

1258

1259 **Figure 9 source data file 1**

1260 Luciferase data relevant to panels C,D.

1261

1262 **Figure 9 source data file 2**

1263 GFP data relevant to panel J

1264

1265 **Figure 9 source data file 3**

1266 GFP data relevant to panel O

1267

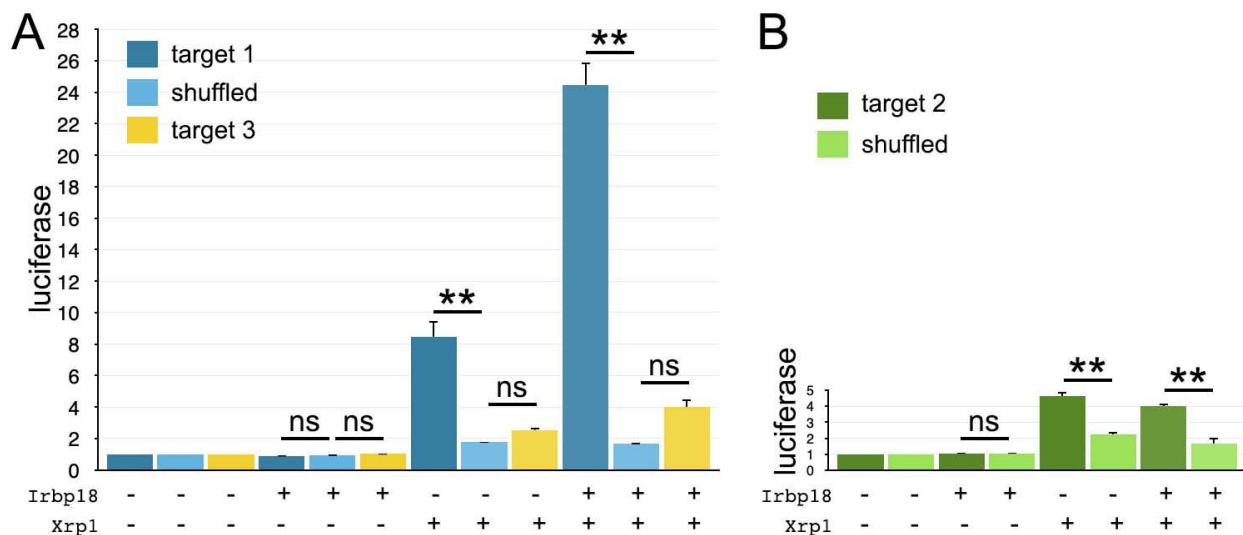

1268

1269 **Figure 9 Figure Supplement 1. Luciferase assays with *hsp70*-based reporter**  
1270 **plasmids.**

1271 Fold change in the luciferase/renilla signal is shown for the remaining reporter  
1272 constructs shown in Figure 9B. A) Target 1 conferred sequence-specific activation by  
1273 transfected Xrp1 protein. Transfected Irpb18 alone had no effect, but synergized with  
1274 Xrp1. Lesser activation by Target 3 was rendered not significant by correction for  
1275 multiple testing, but the increase in both Xrp1 and Xrp1+Irpb18 samples suggests that it  
1276 may nevertheless be real. B) Target 2 conferred sequence-specific activation by  
1277 transfected Xrp1 protein. Transfected Irpb18 alone had no effect. It may be significant  
1278 that Targets 1 and 3 are better matches to the in vivo-derived ChIP-Seq consensus than  
1279 Target 2 (see Figure 9A). Statistics: 1-way ANOVA with Bonferroni-Holm correction  
1280 for multiple testing was performed for the data shown in each of panels A,B. ns,  
1281  $p > 0.05$ . \*\*,  $p < 0.01$ . Data were based on triplicate measurements from each of 3  
1282 biological replicates for each transfection. Exact p-values for comparisons between  
1283 target 1 reporters and scrambled reporters (panel A) were:  $P_{adj} = 4.51$ ,  $P_{adj} = 1.80 \times 10^{-6}$ ,  
1284  $P_{adj} = 0$  for Irpb18, Xrp1, and Irpb18+Xrp1 transfected cells respectively. Exact p-values  
1285 for comparisons between target 2 reporters and scrambled reporters (panel A) were:  
1286  $P_{adj} = 2.81$ ,  $P_{adj} = 4.22$ ,  $P_{adj} = 0.225$  for Irpb18, Xrp1, and Irpb18+Xrp1 transfected cells  
1287 respectively. Exact p-values for comparisons between target 3 reporters and scrambled  
1288 reporters (panel B) were:  $P_{adj} = 0.983$ ,  $P_{adj} = 6.70 \times 10^{-6}$ ,  $P_{adj} = 8.03 \times 10^{-6}$ , for Irpb18,  
1289 Xrp1, and Irpb18+Xrp1 transfected cells respectively.

1290

1291 **Figure 9 Figure Supplement 1 source data file 1**

1292 Luciferase measurements relevant to Figure 9 Supplement 1.

1293

1294

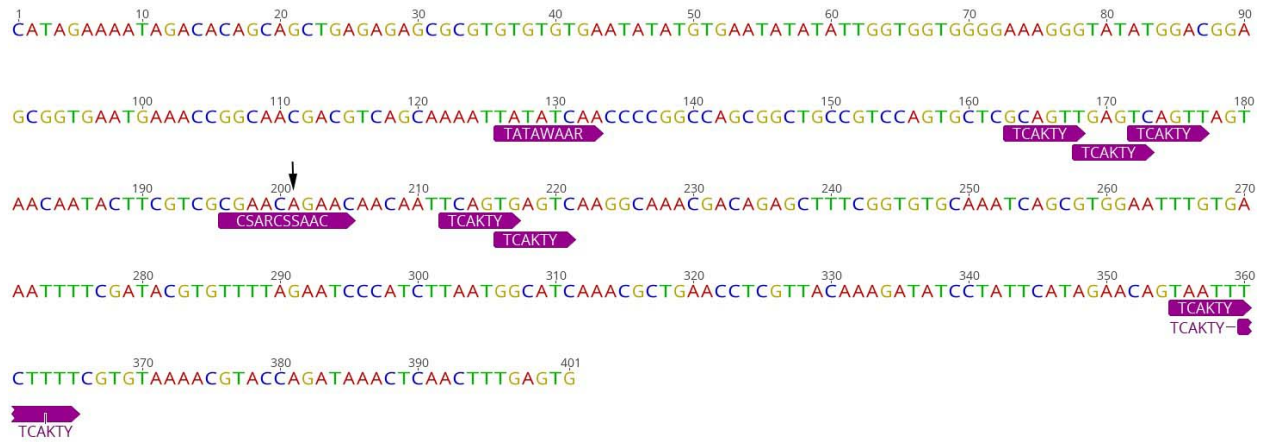

1295

1296 **Figure 9 Figure Supplement 2. *Xrp1* promoter proximal sequences**

1297 The 400bp *Xrp1* core promoter sequence is shown. Transcription start site indicated by  
 1298 arrow. A variety of conserved promoter element sequences are indicated (Ohler, Liao,  
 1299 Niemann, & Rubin, 2002; Juven-Gershon & Kadonaga, 2010).

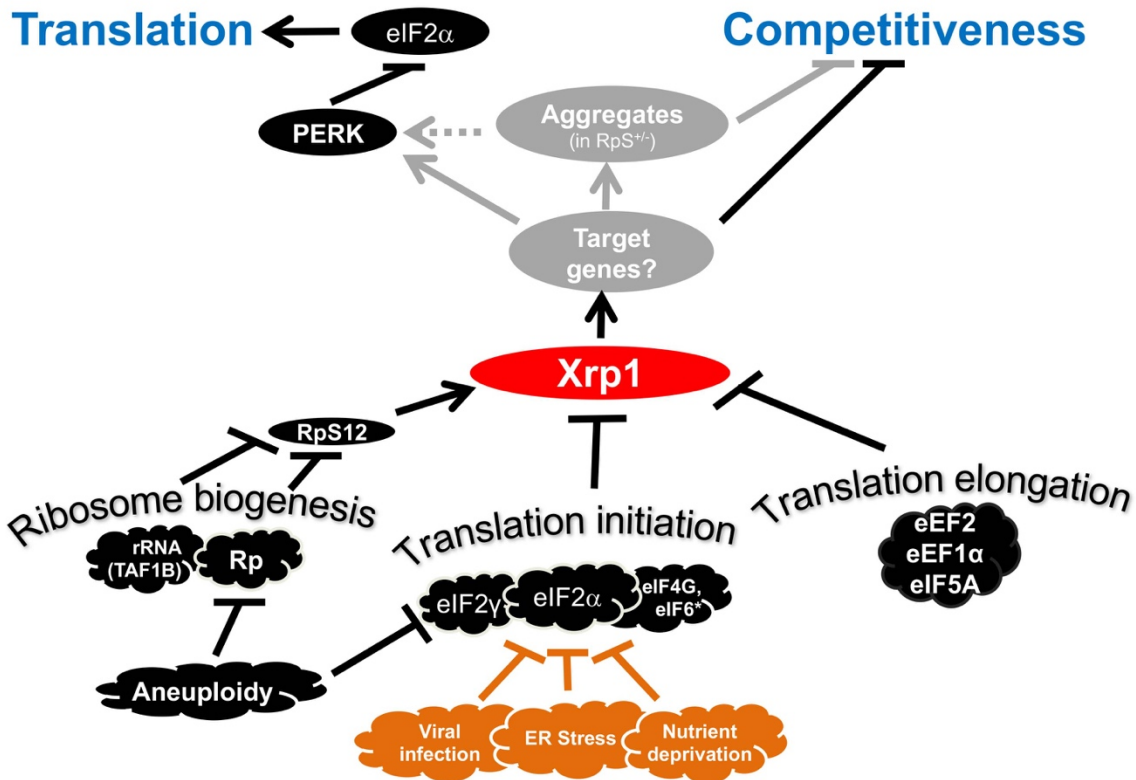

1300

1301 **Figure 10 Transcriptional responses to Ribosome defects**

1302 Multiple consequences of defects in ribosome biogenesis, translation initiation, and  
 1303 translation elongation, depend on the transcription factor Xrp1 in imaginal disc cells.

1304 Xrp1 is responsible for, or contributes to, reduced translation in response to these  
1305 defects, through the PERK-dependent phosphorylation of eIF2 $\alpha$ , a global regulator of  
1306 CAP-dependent translation initiation. Xrp1 protein expression also marks imaginal disc  
1307 cells for elimination in competition with wild type cells. Cell competition often correlates  
1308 with differences in translation rate because so many ribosome stresses activate Xrp1.  
1309 This includes reduced eIF2 activity, as caused by eIF2 $\alpha$  phosphorylation, or eIF2 $\gamma$   
1310 haploinsufficiency, but these are not sufficient to trigger cell competition without Xrp1.  
1311 We speculate that other cellular stresses that phosphorylate eIF2 $\alpha$ , including ER stress,  
1312 nutrient deprivation, or (in mammals) infection with certain viruses might mark cells for  
1313 competition, or interfere with cell competition that recognizes aneuploid cells on the  
1314 basis of *Rp* or eIF2 $\gamma$  gene haploinsufficiency. It is notable that defective Tor signaling,  
1315 which also reduces global translation rate, does not cause cell competition,  
1316 (Baumgartner et al., 2021), making the molecular mechanism of Xrp1 induction  
1317 uncertain, although several genetic pathways have been shown to induce Xrp1,  
1318 including dependence on RpS12 in *Rp*<sup>+/-</sup> cells and TAF1B-depleted cells(Akdemir et al.,  
1319 2007; Chapin et al., 2014; Lee et al., 2018; Ji et al., 2019).

1320

1321



1322

1323 **Supplementary Table 1: Genotypes and heat shock times of Figures**

| Genotypes and heat shock times of Figures                                                                                                                                                                                                                                                                                                                                                                                                                                                                                                                                                                                                                                                                                                                                                                                                                                                                                                                                                                                                                                                                                               | Heat shock time (min) |
|-----------------------------------------------------------------------------------------------------------------------------------------------------------------------------------------------------------------------------------------------------------------------------------------------------------------------------------------------------------------------------------------------------------------------------------------------------------------------------------------------------------------------------------------------------------------------------------------------------------------------------------------------------------------------------------------------------------------------------------------------------------------------------------------------------------------------------------------------------------------------------------------------------------------------------------------------------------------------------------------------------------------------------------------------------------------------------------------------------------------------------------------|-----------------------|
| <p><b>Figure 1, 2 and Figure 2-Figure supplement 1</b></p> <p>For Northern:</p> <p>wt genotype: p{hs:FLP}/w118; p{arm:LacZ} FRT80B/+</p> <p>Xrp1/+ genotype: p{hs:FLP}/w118; FRT82B <i>Xrp1</i><sup>M2-73</sup>/+</p> <p>RpS3/+ genotype: p{hs:FLP}/ p{hs:FLP}; FRT42/+; FRT82 <i>RpS3</i> p{arm:LacZ} /+</p> <p>RpS3/+; Xrp/+ genotype: p{hs:FLP}/ p{hs:FLP}; FRT82 <i>RpS3</i> p{arm:LacZ} /FRT82B <i>Xrp1</i><sup>M2-73</sup></p> <p>RpS17/+ genotype: p{hs:FLP}/ p{hs:FLP}; FRT42/+; FRT80 <i>RpS17</i> p{arm:LacZ} /+</p> <p>RpS17/+; Xrp/+ genotype: p{hs:FLP}/ p{hs:FLP}; FRT80 <i>RpS17</i> p{arm:LacZ} /FRT82B <i>Xrp1</i><sup>M2-73</sup></p> <p><i>RpL27A</i>/+ genotype: p{hs:FLP}/ p{hs:FLP}; <i>RpL27A</i>- p{arm:LacZ} FRT40/+; FRT80B/+</p> <p><i>RpL27A</i>/+; Xrp/+ genotype: p{hs:FLP}/ p{hs:FLP}; <i>RpL27A</i>- p{arm:LacZ} FRT40/+; FRT82B <i>Xrp1</i><sup>M2-73</sup>/+</p> <p><i>RpS18</i>/+ genotype: p{hs:FLP}/ p{hs:FLP}; FRT42 <i>RpS18</i> p{ubi:GFP} /+; FRT80B/+</p> <p><i>RpS18</i>/+; Xrp/+ genotype: p{hs:FLP}/ p{hs:FLP}; FRT42 <i>RpS18</i> p{ubi:GFP} /+; FRT82B <i>Xrp1</i><sup>M2-73</sup>/+</p> |                       |
| <p>Figure 1F, H, Figure 1-Figure supplement 1A, Figure 1-Figure supplement 2A: p{hs:FLP}/ p{hs:FLP}; RpL27A<sup>-</sup> p{arm:LacZ} FRT40/FRT40</p>                                                                                                                                                                                                                                                                                                                                                                                                                                                                                                                                                                                                                                                                                                                                                                                                                                                                                                                                                                                     | 20                    |
| <p>Figure 1G, Figure 1-Figure supplement 1B,C, Figure 1-Figure supplement 2F: p{hs:FLP}/ p{hs:FLP}; FRT82 <i>RpS3</i> p{arm:LacZ} /FRT82B</p>                                                                                                                                                                                                                                                                                                                                                                                                                                                                                                                                                                                                                                                                                                                                                                                                                                                                                                                                                                                           | 20                    |
| <p>Figure 1I, Figure 1-Figure supplement 2B : p{hs:FLP}/ p{hs:FLP}; FRT42 <i>RpS18</i> p{Ubi:GFP}/FRT42</p>                                                                                                                                                                                                                                                                                                                                                                                                                                                                                                                                                                                                                                                                                                                                                                                                                                                                                                                                                                                                                             | 20                    |
| <p>Figure 1-Figure supplement 1D, Figure 1-Figure supplement 2D, E: p{hs:FLP}/+; <i>RpS17</i> p{arm:LacZ} FRT80B/FRT80B</p>                                                                                                                                                                                                                                                                                                                                                                                                                                                                                                                                                                                                                                                                                                                                                                                                                                                                                                                                                                                                             | 20                    |
| <p>Figure 1-Figure supplement 2C: p{hs:FLP}/ p{hs:FLP}; FRT42 <i>RpS18</i> p{Ubi:GFP}/FRT42;</p>                                                                                                                                                                                                                                                                                                                                                                                                                                                                                                                                                                                                                                                                                                                                                                                                                                                                                                                                                                                                                                        | 20                    |

|                                                                                                                                          |          |
|------------------------------------------------------------------------------------------------------------------------------------------|----------|
| FRT82B <i>Xrp1</i> <sup>M2-73/+</sup>                                                                                                    |          |
| Figure 2E, F: p{hs:FLP}/+; UAS- RNAi <sup>TAF1B</sup> /+ ; <i>RpS17</i> , act>CD2>Gal4 , UAS-GFP /+<br>(line: v105873)                   | 25±525±5 |
| Figure 2G: p{hs:FLP}/+; UAS- RNAi <sup>TAF1B</sup> /+ ;act>CD2>Gal4 , UAS- GFP /+ (line: Bl 61957)                                       | 25±5     |
| Figure 2H: p{hs:FLP}/+; UAS-RNAi <sup>TAF1B</sup> /+ ;act>CD2>Gal4 , UAS- GFP /+ (line: Bl 61957)                                        | <20      |
| Figure 2I: p{hs:FLP}/+; UAS- RNAi <sup>TAF1B</sup> /UAS-RNAi <sup>Xrp1</sup> ;act>CD2>Gal4 , UAS- GFP /+ (line: Bl 61957)                | <20      |
| Figure 2J: p{hs:FLP}/+; UAS- RNAi <sup>TAF1B</sup> /TRE-RFP ;act>CD2>Gal4 , UAS- GFP /+ (line: Bl 61957) (processed in parallel with 2I) | <20      |
| Figure 3A: p{hs:FLP}/+; <i>RpS17</i> p{arm:LacZ} FRT80B/FRT80B                                                                           | 20       |
| Figure 3B: p{hs:FLP}/ p{hs:FLP}; RpL27A <sup>-</sup> p{arm:LacZ} FRT40/FRT40                                                             | 20       |
| Figure 3C: p{hs:FLP}/+; <i>RpS17</i> , act>CD2>Gal4 , UAS-GFP /UAS- RNAi <sup>Xrp1</sup>                                                 | 10       |
| Figure 3E,F: p{hs:FLP}/+; UAS- <i>PPP1R15</i> /+ ; <i>RpS17</i> , act>CD2>Gal4 , UAS-GFP /+                                              | 10       |
| Figure 3G: p{hs:FLP}/+; UAS- RNAi <sup>PERK</sup> /+ ;act>CD2>Gal4 , UAS-GFP /+                                                          | 15       |
| Figure 3H, I: p{hs:FLP}/+; UAS- RNAi <sup>PERK</sup> /+ ; <i>RpS17</i> , act>CD2>Gal4 , UAS-GFP /+                                       | 15       |
| Figure 3J: p{hs:FLP}/+; UAS- RNAi <sup>Gcn2</sup> /+ ; <i>RpS17</i> , act>CD2>Gal4 , UAS-GFP /+                                          | 15       |
| Figure 3 - Figure supplement 1A, A': p{hs:FLP}/ p{hs:FLP}; FRT82 <i>RpS3</i> p{arm:LacZ} /FRT82B                                         | 20       |
| Figure 3 - Figure supplement 1B, B': p{hs:FLP}/ p{hs:FLP}; FRT42 <i>RpS18</i> p{Ubi:GFP}/FRT42                                           | 20       |
| Figure 3 - Figure supplement 1C, C': p{hs:FLP}/ p{hs:FLP}; FRT82 <i>RpS3</i> p{arm:LacZ} /FRT82B <i>Xrp1</i> <sup>M2-73</sup>            | 20       |
| Figure 3 - Figure supplement 1D, D': p{hs:FLP}/ p{hs:FLP}; <i>RpS17</i> FRT80B/p{arm:LacZ} FRT80B                                        | 20       |
| Figure 3 - Figure supplement 1E, E': p{hs:FLP}/ p{hs:FLP}; <i>RpS17</i> FRT80B/p{arm:LacZ} FRT80B <i>Xrp1</i> <sup>M2-73</sup>           | 20       |
| Figure 3 - Figure supplement 1F-G': p{hs:FLP}/+; <i>RpS17</i> , act>CD2>Gal4 , UAS-GFP /UAS- RNAi <sup>Irbp18</sup>                      | 10       |

|                                                                                                                                                                          |       |
|--------------------------------------------------------------------------------------------------------------------------------------------------------------------------|-------|
| Figure 3 - Figure supplement 1H, H': en-GAL4, UAS-GFP /UAS-PPP1R15; FRT82 <i>RpS3</i> /+                                                                                 | No hs |
| Figure 3 - Figure supplement 1I, I': <i>RpS18</i> <sup>-</sup> , en-GAL4, UAS-GFP /UAS-PPP1R15                                                                           | No hs |
| Figure 3 - Figure supplement 1J, J': en-GAL4, UAS-GFP / UAS- RNAi <sup>PERK</sup> ; FRT82 <i>RpS3</i> /+                                                                 | No hs |
| Figure 3 - Figure supplement 1K, K': <i>RpS18</i> <sup>-</sup> , en-GAL4, UAS-GFP /UAS- RNAi <sup>PERK</sup>                                                             | No hs |
| Figure 3 - Figure supplement 1L, L': p{hs:FLP}/+; UAS- RNAi <sup>PERK</sup> / <i>RpS18</i> <sup>-</sup> ; act>CD2>Gal4, UAS-His-RFP/+                                    | 10    |
| Figure 4A-A''': p{hs:FLP}/ p{hs:FLP}; FRT42 <i>RpS18</i> p{Ubi:GFP}/FRT42                                                                                                | 20    |
| Figure 4B-B''': p{hs:FLP}/ p{hs:FLP}; FRT82 <i>RpS3</i> p{arm:LacZ} /FRT82B                                                                                              | 20    |
| Figure 4C-C''': p{hs:FLP}/ p{hs:FLP}; RpL27A <sup>-</sup> p{arm:LacZ} FRT40/FRT40                                                                                        | 20    |
| Figure 4D-D''': p{hs:FLP}/+; UAS- RNAi <sup>PERK</sup> / GstD-lacZ, <i>RpS18</i> <sup>-</sup> ; act>CD2>Gal4, UAS-GFP /+                                                 | 10-15 |
| Figure 4E-E''': p{hs:FLP}/ p{hs:FLP}; FRT82 <i>RpS3</i> p{arm:LacZ} /FRT82B <i>Xrp1</i> <sup>M2-73</sup>                                                                 | 20    |
| Figure 4F, G: <b>wt genotype</b> : w <sup>1-18</sup> /+; FRT82B/+,                                                                                                       | No hs |
| Figure 4F, G: <b><i>RpS17</i>/+ genotype</b> : w <sup>1-18</sup> /y w p{hs:FLP}; <i>RpS17</i> p{ubi:GFP} FRT80B/+                                                        | No hs |
| Figure 4F, G: <b><i>RpS3</i>/+ genotype</b> : w <sup>1-18</sup> /y w p{hs:FLP}; FRT82 <i>RpS3</i> p{arm:LacZ}/+                                                          | No hs |
| Figure 4F, G: <b><i>RpS3</i>/+, <i>Xrp1</i>[M2-73]/+ genotype</b> : w <sup>1-18</sup> /y w p{hs:FLP}; FRT82 <i>RpS3</i> p{arm:LacZ}/ FRT82B <i>Xrp1</i> <sup>M2-73</sup> | No hs |
| Figure 4 - Figure supplement 1A, A': Xbp1-EGFP/nubGal4; +/+                                                                                                              | No hs |
| Figure 4 - Figure supplement 1B, B': Xbp1-EGFP/nubGal4; <i>RpS17</i> p{arm:LacZ} FRT80B /+                                                                               | No hs |
| Figure 4 - Figure supplement 1C, C': Xbp1-EGFP/nubGal4; FRT82 <i>RpS3</i> p{arm:LacZ} /+                                                                                 | No hs |
| Figure 5A: {hs:FLP}/+; act>CD2>Gal4 , UAS-GFP / UAS – RNAi <sup>w</sup>                                                                                                  | 7     |
| Figure 5B: {hs:FLP}/+; act>CD2>Gal4 , UAS-GFP / UAS – RNAi <sup>PPP1R15</sup> (line: BL 33011)<br>(samples were processed on the same day)                               | 7     |
| Figure 5C: {hs:FLP}/+; UAS – RNAi <sup>PPP1R15</sup> /TRE-RFP ; act>CD2>Gal4 , UAS-GFP /+<br>(line: v107545) (processed in parallel with 5J)                             | 10-15 |
| Figure 5D: {hs:FLP}/+; act>CD2>Gal4 , UAS-GFP / UAS – RNAi <sup>PPP1R15</sup> (line: BL 33011)                                                                           | 25±5  |



|                                                                                                                                                                                                                                                                    |       |
|--------------------------------------------------------------------------------------------------------------------------------------------------------------------------------------------------------------------------------------------------------------------|-------|
| Figure 5E: {hs:FLP}/+; UAS – RNAi <sup>PPP1R15</sup> /+ ; act>CD2>Gal4 , UAS-GFP /+<br>(line: v107545)                                                                                                                                                             | 25±5  |
| Figure 5F: nubGal4, UAS-RFP/+; Xrp1-HA/+                                                                                                                                                                                                                           | No hs |
| Figure 5G: nubGal4, UAS-RFP/ UAS – RNAi <sup>PPP1R15</sup> ; Xrp1-HA/+ (line: v107545)                                                                                                                                                                             | No hs |
| Figure 5H, J, K: {hs:FLP}/+; UAS – RNAi <sup>PPP1R15</sup> / UAS-RNAi <sup>Xrp1</sup> ; act>CD2>Gal4 , UAS-GFP /+<br>(line: v107545) (5H processed in parallel with 5I. Also, 5K processed in parallel with Figure 5<br>Suppl 1B)                                  | 10-15 |
| Figure 5I : {hs:FLP}/+; UAS – RNAi <sup>PPP1R15</sup> /TRE-RFP; act>CD2>Gal4 , UAS-GFP /+ (line<br>RNAi <sup>PPP1R15</sup> : v107545 and line RNAi <sup>Xrp1</sup> : v107860)                                                                                      | 10-15 |
| Figure 5 - Figure supplement 1A: {hs:FLP}/+; act>CD2>Gal4 , UAS-GFP / UAS – RNAi <sup>PPP1R15</sup><br>(line: BL 33011)                                                                                                                                            | 25±5  |
| Figure 5 - Figure supplement 1B: {hs:FLP}/+; UAS – RNAi <sup>PPP1R15</sup> /+ ; act>CD2>Gal4 , UAS-<br>GFP /+ (line: v107545) (processed in parallel with Figure 5K)                                                                                               | 10-15 |
| Figure 5 - Figure supplement 1C: {hs:FLP}/+; UAS – RNAi <sup>PPP1R15</sup> /+ ; act>CD2>Gal4 , UAS-<br>GFP /+ (line: v107545) (basal side of the same disc in Figure 5E)                                                                                           | 25±5  |
| Figure 5 - Figure supplement 1D: nubGal4, UAS-RFP/ UAS – RNAi <sup>PPP1R15</sup> ; Xrp1-HA/+ (line: Bl<br>33011)                                                                                                                                                   | No hs |
| Figure 5 - Figure supplement 1E: {hs:FLP}/+; UAS – RNAi <sup>PPP1R15</sup> /+ ; act>CD2>Gal4 , UAS-<br>GFP /+ (line: v107545) (basal side of the same disc in Figure 5H)                                                                                           | 10-15 |
| Figure 5 - Figure supplement 1F: {hs:FLP}/+; UAS – RNAi <sup>PPP1R15</sup> /UAS-RNAi <sup>Xrp1</sup> ;<br>act>CD2>Gal4 , UAS-GFP /+ (line RNAi <sup>PPP1R15</sup> : v107545 and line RNAi <sup>Xrp1</sup> : v107860)<br>(basal side of the same disc in Figure 5I) | 10-15 |
| Figure 5 - Figure supplement 1G: p{hs:FLP}/+; UAS- RNAi <sup>PPP1R15</sup> /+ ;act>CD2>Gal4 , UAS-<br>GFP /+ (line: Bl 33011)                                                                                                                                      | 25±5  |
| Figure 6A, B, D, D: {hs:FLP}/+; UAS – RNAi <sup>clF4G</sup> /+ ; act>CD2>Gal4 , UAS-GFP /+<br>(line: v17002)                                                                                                                                                       | 25±5  |
| Figure 6C: {hs:FLP}/+; UAS – RNAi <sup>clF4G</sup> /+ ; act>CD2>Gal4 , UAS-GFP /Xrp1-HA                                                                                                                                                                            | 25±5  |

|                                                                                                                                                                                                  |       |
|--------------------------------------------------------------------------------------------------------------------------------------------------------------------------------------------------|-------|
| (line: v17002)                                                                                                                                                                                   |       |
| Figure 6E, F, J: {hs:FLP}/+; UAS – RNAi <sup>eEF2</sup> /+ ; act>CD2>Gal4 , UAS-GFP /+<br>(line: v107268)                                                                                        | 25±5  |
| Figure 6G: {hs:FLP}/+; UAS – RNAi <sup>eEF2</sup> /+ ; act>CD2>Gal4 , UAS-GFP / Xrp1-HA<br>(line: v107268)                                                                                       | 25±5  |
| Figure 6I, J, L: {hs:FLP}/+; UAS – RNAi <sup>eEF1α1</sup> /+ ; act>CD2>Gal4 , UAS-GFP /+<br>(line: v104502)                                                                                      | 25±5  |
| Figure 6K: {hs:FLP}/+; UAS – RNAi <sup>eEF1α1</sup> /+ ; act>CD2>Gal4 , UAS-GFP / Xrp1-HA<br>(line: v104502)                                                                                     | 25±5  |
| Figure 6M, N: p {hs:FLP}/+; UAS-RNAi <sup>TAF1B</sup> /+ ;act>CD2>Gal4 , UAS- GFP /+ (line: Bl 61957)                                                                                            | 10-15 |
| Figure 6 - Figure supplement 1A, B, D: {hs:FLP}/+; UAS – RNAi <sup>eIF5A</sup> /+ ; act>CD2>Gal4 , UAS-GFP /+ (line: v101513)                                                                    | 25±5  |
| Figure 6 - Figure supplement 1C: {hs:FLP}/+; UAS – RNAi <sup>eIF5A</sup> /+ ; act>CD2>Gal4 , UAS-GFP / Xrp1-HA (line: v101513)                                                                   | 25±5  |
| Figure 6 - Figure supplement 1E, F, H: {hs:FLP}/+; UAS – RNAi <sup>eIF6</sup> /TRE-RFP; act>CD2>Gal4 , UAS-GFP /+ (line: v108094) (processed in parallel with Figure 7 - Figure supplement 1H-J) | 10-15 |
| Figure 6 - Figure supplement 1G: {hs:FLP}/+; UAS – RNAi <sup>eIF6</sup> /+ ; act>CD2>Gal4 , UAS-GFP / Xrp1-HA (line: v108094)                                                                    | 25±5  |
| Figure 6 - Figure supplement 1I: p {hs:FLP}/+; UAS- RNAi <sup>TAF1B</sup> /+ ;act>CD2>Gal4 , UAS- GFP / Xrp1-HA (line: v105873)                                                                  | 25±5  |
| Figure 6 - Figure supplement 1J: p {hs:FLP}/+; UAS- RNAi <sup>TAF1B</sup> /+ ;act>CD2>Gal4 , UAS- GFP /+ (line: Bl 61957)                                                                        | 25±5  |
| Figure 6 - Figure supplement 2A: nubGal4, UAS-RFP/+ ; Xrp1-HA/+                                                                                                                                  | No hs |
| Figure 6 - Figure supplement 2B: nubGal4, UAS-RFP/ UAS – RNAi <sup>eIF4G</sup> ; Xrp1-HA/+                                                                                                       | No hs |
| Figure 6 - Figure supplement 2C: nubGal4, UAS-RFP/ UAS – RNAi <sup>eEF2</sup> ; Xrp1-HA/+                                                                                                        | No hs |
| Figure 6 - Figure supplement 2D: nubGal4, UAS-RFP/ UAS – RNAi <sup>eEF1α1</sup> ; Xrp1-HA/+                                                                                                      | No hs |
| Figure 6 - Figure supplement 2E: nubGal4, UAS-RFP/ UAS – RNAi <sup>eIF5A</sup> ; Xrp1-HA/+                                                                                                       | No hs |
| Figure 6 - Figure supplement 2F: nubGal4, UAS-RFP/ UAS – RNAi <sup>eIF6</sup> ; Xrp1-HA/+                                                                                                        | No hs |
| Figure 6 - Figure supplement 2G: nubGal4, UAS-RFP/ RNAi <sup>TAF1B</sup> ; Xrp1-HA/+ (v105873)                                                                                                   | No hs |
| Figure 6 - Figure supplement 2H: nubGal4, UAS-RFP/ RNAi <sup>TAF1B</sup> ; Xrp1-HA/+ (line: Bl 61957)                                                                                            | No hs |

|                                                                                                                                                                                                                          |       |
|--------------------------------------------------------------------------------------------------------------------------------------------------------------------------------------------------------------------------|-------|
| Figure 7A-C: {hs:FLP}/+; UAS – RNAi <sup>eEF2</sup> /UAS-PPP1R15 ; act>CD2>Gal4 , UAS-GFP / +                                                                                                                            | 25±5  |
| Figure 7D-F: {hs:FLP}/+; UAS – RNAi <sup>eIF4G</sup> /UAS-PPP1R15 ; act>CD2>Gal4 , UAS-GFP / +                                                                                                                           | 25±5  |
| Figure 7G-I: {hs:FLP}/+; UAS – RNAi <sup>eIF6</sup> /UAS-PPP1R15 ; act>CD2>Gal4 , UAS-GFP / +                                                                                                                            | 25±5  |
| Figure 7J: {hs:FLP}/+; UAS – RNAi <sup>eEF2</sup> /UAS-PPP1R15 ; act>CD2>Gal4 , UAS-GFP / Xrp1-HA                                                                                                                        | 25±5  |
| Figure 7K: {hs:FLP}/+; UAS – RNAi <sup>eIF4G</sup> /UAS-PPP1R15 ; act>CD2>Gal4 , UAS-GFP / Xrp1-HA                                                                                                                       | 25±5  |
| Figure 7L: {hs:FLP}/+; UAS – RNAi <sup>eIF6</sup> /UAS-PPP1R15 ; act>CD2>Gal4 , UAS-GFP / Xrp1-HA                                                                                                                        | 25±5  |
| Figure 7M-O: {hs:FLP}/+; UAS – RNAi <sup>eEF2</sup> /UAS- RNAi <sup>Xrp1</sup> ; act>CD2>Gal4 , UAS-GFP / +                                                                                                              | 25±5  |
| Figure 7P-R: {hs:FLP}/+; UAS – RNAi <sup>eIF4G</sup> /UAS- RNAi <sup>Xrp1</sup> ; act>CD2>Gal4 , UAS-GFP / +                                                                                                             | 25±5  |
| Figure 7S-U: {hs:FLP}/+; UAS – RNAi <sup>eIF1α1</sup> /UAS- RNAi <sup>Xrp1</sup> ; act>CD2>Gal4 , UAS-GFP / +                                                                                                            | 25±5  |
| Figure 7 - Figure supplement 1A: {hs:FLP}/+; UAS – RNAi <sup>eEF1α1</sup> / UAS-PPP1R15 ;<br>act>CD2>Gal4 , UAS-GFP /+ (line: v104502)                                                                                   | 25±5  |
| Figure 7 - Figure supplement 1B: {hs:FLP}/+; UAS – RNAi <sup>eEF1α1</sup> / UAS-PPP1R15 ;<br>act>CD2>Gal4 , UAS-GFP /Xrp1-HA (line: v104502)                                                                             | 25±5  |
| Figure 7 - Figure supplement 1C: {hs:FLP}/+; UAS – RNAi <sup>eIF5A</sup> / UAS-PPP1R15 ;<br>act>CD2>Gal4 , UAS-GFP /+ (line: v101513)                                                                                    | 25±5  |
| Figure 7 - Figure supplement 1D: {hs:FLP}/+; UAS – RNAi <sup>eIF5A</sup> / UAS-PPP1R15 ;<br>act>CD2>Gal4 , UAS-GFP /Xrp1-HA (line: v101513)                                                                              | 25±5  |
| Figure 7 - Figure supplement 1E-G: {hs:FLP}/+; UAS – RNAi <sup>eIF5A</sup> / UAS-RNAi <sup>Xrp1</sup> ;<br>act>CD2>Gal4 , UAS-GFP /+ (line: v101513)                                                                     | 25±5  |
| Figure 7 - Figure supplement 1H-J: {hs:FLP}/+; UAS – RNAi <sup>eIF6</sup> / UAS-RNAi <sup>Xrp1</sup> ;<br>act>CD2>Gal4 , UAS-GFP /+ (line: v108094) (processed in parallel with Figure 6 - Figure<br>supplement 1E-F, H) | 10-15 |
| Figure 7 - Figure supplement 2A: {hs:FLP}/+; UAS – RNAi <sup>eEF2</sup> /UAS-RNAi <sup>PERK</sup> ; act>CD2>Gal4<br>, UAS-GFP / Xrp1-HA (PERK-RNAi: v110278)                                                             | 25±5  |
| Figure 7 - Figure supplement 2B: {hs:FLP}/+; UAS – RNAi <sup>eEF2</sup> /UAS-RNAi <sup>PERK</sup> ; act>CD2>Gal4<br>, UAS-GFP /+ (PERK-RNAi: v110278)                                                                    | 25±5  |
| Figure 7 - Figure supplement 2C: {hs:FLP}/+; UAS – RNAi <sup>eIF4G</sup> /UAS-RNAi <sup>PERK</sup> ;<br>act>CD2>Gal4 , UAS-GFP / Xrp1-HA (PERK-RNAi: v110278)                                                            | 25±5  |
| Figure 7 - Figure supplement 2D: {hs:FLP}/+; UAS – RNAi <sup>eIF4G</sup> /UAS-RNAi <sup>PERK</sup> ;<br>act>CD2>Gal4 , UAS-GFP /+ (PERK-RNAi: v110278)                                                                   | 25±5  |
| Figure 7 - Figure supplement 2E: {hs:FLP}/+; UAS – RNAi <sup>eIF6</sup> /UAS-RNAi <sup>PERK</sup> ; act>CD2>Gal4 ,<br>UAS-GFP / Xrp1-HA (PERK-RNAi: v110278)                                                             | 25±5  |
| Figure 7 - Figure supplement 2F: {hs:FLP}/+; UAS – RNAi <sup>eIF6</sup> /UAS-RNAi <sup>PERK</sup> ; act>CD2>Gal4<br>, UAS-GFP /+ (PERK-RNAi: v110278)                                                                    | 25±5  |

|                                                                                                                                                                |       |
|----------------------------------------------------------------------------------------------------------------------------------------------------------------|-------|
| Figure 7 - Figure supplement 2G: {hs:FLP}/+; UAS – RNAi <sup>eEF1α1</sup> /UAS-RNAi <sup>PERK</sup> ;<br>act>CD2>Gal4 , UAS-GFP / Xrp1-HA (PERK-RNAi: v110278) | 25±5  |
| Figure 7 - Figure supplement 2H: {hs:FLP}/+; UAS – RNAi <sup>eEF1α1</sup> /UAS-RNAi <sup>PERK</sup> ;<br>act>CD2>Gal4 , UAS-GFP /+ (PERK-RNAi: v110278)        | 25±5  |
| Figure 7 - Figure supplement 2I: {hs:FLP}/+; UAS – RNAi <sup>eIF5A</sup> /UAS-RNAi <sup>PERK</sup> ; act>CD2>Gal4<br>, UAS-GFP / Xrp1-HA (PERK-RNAi: v110278)  | 25±5  |
| Figure 7 - Figure supplement 2J: {hs:FLP}/+; UAS – RNAi <sup>eIF5A</sup> /UAS-RNAi <sup>PERK</sup> ; act>CD2>Gal4<br>, UAS-GFP /+ (PERK-RNAi: v110278)         | 25±5  |
| Figure 8A: nubGal4, UAS-RFP/+; Xrp1-HA/Xrp1-HA                                                                                                                 | No hs |
| Figure 8B: nubGal4, UAS-RFP/ UAS – RNAi <sup>TAF1B</sup> ;Xrp1-HA/ Xrp1-HA (line: v105873)                                                                     | No hs |
| Figure 8C: nubGal4, UAS-RFP/ UAS – RNAi <sup>TAF1B</sup> ; <i>Rps12<sup>G97D</sup></i> , Xrp1-HA/ <i>Rps12<sup>G97D</sup></i> , Xrp1-HA                        | No hs |
| Figure 8D: nubGal4, UAS-RFP/ UAS – RNAi <sup>eEF2</sup> ;Xrp1-HA/ Xrp1-HA                                                                                      | No hs |
| Figure 8E: nubGal4, UAS-RFP/ UAS – RNAi <sup>eEF2</sup> ; <i>Rps12<sup>G97D</sup></i> , Xrp1-HA/ <i>Rps12<sup>G97D</sup></i> , Xrp1-HA                         | No hs |
| Figure 9F: GstD1-GFP;                                                                                                                                          | No hs |
| Figure 9G: GstD1-GFP/+; FRT82 <i>RpS3</i> p{arm:LacZ}/+                                                                                                        | No hs |
| Figure 9H: GstD1ΔARE-GFP/+; +/+                                                                                                                                | No hs |
| Figure 9I: GstD1ΔARE-GFP/+; FRT82 <i>RpS3</i> p{arm:LacZ}/+                                                                                                    | No hs |
| Figure 9K: GstD1-GFP;                                                                                                                                          | No hs |
| Figure 9L: GstD1-GFP; <i>RpS17</i> p{arm:LacZ} FRT80B/+                                                                                                        | No hs |
| Figure 9M: GstD1 Xrp1m -GFP                                                                                                                                    | No hs |
| Figure 9N: GstD1Xrp1m-GFP; <i>RpS17</i> p{arm:LacZ} FRT80B/+                                                                                                   | No hs |

1324

1325



1326  
1327

1328 REFERENCES

- 1329 Akdemir, F., Christich, A., Sogame, N., Chapo, J., & Abrams, J. M. (2007). p53 directs focused  
1330 genomic responses in *Drosophila*. *Oncogene*, *26*(36), 5184-5193.
- 1331 Albert, B., Kos-Braun, I. C., Henras, A. K., Dez, C., Rueda, M. P., Zhang, X., et al. (2019). A  
1332 ribosome assembly stress response regulates transcription to maintain proteome  
1333 homeostasis. *Elife*, *8*.
- 1334 Aspesi, A., & Ellis, S. R. (2019). Rare ribosomopathies: insights into mechanisms of cancer. *Nat*  
1335 *Rev Cancer*, *19*(4), 228-238.
- 1336 Baillon, L., Germani, F., Rockel, C., Hilchenbach, J., & Basler, K. (2018). Xrp1 is a transcription  
1337 factor required for cell competition-driven elimination of loser cells. *Sci Rep*, *8*(1),  
1338 17712.
- 1339 Baker, N. E. (2020). Emerging mechanisms of cell competition. *Nat Rev Genet*.
- 1340 Baker, N. E., Kiparaki, M., & Khan, C. (2019). A potential link between p53, cell competition and  
1341 ribosomopathy in mammals and in *Drosophila*. *Dev Biol*, *446*(1), 17-19.
- 1342 Baumgartner, M. E., Dinan, M. P., Langton, P. F., Kucinski, I., & Piddini, E. (2021). Proteotoxic  
1343 stress is a driver of the loser status and cell competition. *Nat Cell Biol*, *23*(2), 136-146.
- 1344 Belasco, J. G. (2010). All things must pass: contrasts and commonalities in eukaryotic and  
1345 bacterial mRNA decay. *Nat Rev Mol Cell Biol*, *11*(7), 467-478.
- 1346 Bertolotti, A., Zhang, Y., Hendershot, L. M., Harding, H. P., & Ron, D. (2000). Dynamic  
1347 interaction of BiP and ER stress transducers in the unfolded-protein response. *Nat Cell*  
1348 *Biol*, *2*(6), 326-332.
- 1349 Blanco, J., Cooper, J. C., & Baker, N. E. (2020). Roles of C/EBP class bZip proteins in the growth  
1350 and cell competition of Rp ('Minute') mutants in *Drosophila*. *Elife*, *9*, e50535.
- 1351 Bolton, H., Graham, S. J., Van der Aa, N., Kumar, P., Theunis, K., Fernandez Gallardo, E., et al.  
1352 (2016). Mouse model of chromosome mosaicism reveals lineage-specific depletion of  
1353 aneuploid cells and normal developmental potential. *Nat Commun*, *7*, 11165.
- 1354 Boring, L., Sinervo, B., & Schubiger, G. (1989). Experimental phenocopy of a Minute maternal-  
1355 effect mutation alters blastoderm determination in embryos of *Drosophila*  
1356 *melanogaster*. *Developmental Biology*, *132*, 343-354.
- 1357 Boulan, L., Andersen, D., Colombani, J., Boone, E., & Leopold, P. (2019). Inter-Organ Growth  
1358 Coordination Is Mediated by the Xrp1-Dilp8 Axis in *Drosophila*. *Dev Cell*, *49*(5), 811-818  
1359 e814.
- 1360 Bridges, C. B., & Morgan, T. H. (1923). The third-chromosome group of mutant characters of  
1361 *Drosophila melanogaster*. *Carnegie Institute Publication*, *327*, 1-251.
- 1362 Brina, D., Miluzio, A., Ricciardi, S., & Biffo, S. (2015). eIF6 anti-association activity is required for  
1363 ribosome biogenesis, translational control and tumor progression. *Biochim Biophys*  
1364 *Acta*, *1849*(7), 830-835.
- 1365 Brown, B., Mitra, S., Roach, F. D., Vasudevan, D., & Ryoo, H. D. The Transcription Factor Xrp1 is  
1366 Required for PERK-Mediated Antioxidant Gene Induction in *Drosophila*. . *submitted*.

- 1367 Chapin, A., Hu, H., Ryneerson, S. G., Hollien, J., Yandell, M., & Metzstein, M. M. (2014). In vivo  
1368 determination of direct targets of the nonsense-mediated decay pathway in *Drosophila*.  
1369 *G3 (Bethesda)*, 4(3), 485-496.
- 1370 Cheng, Z., Mugler, C. F., Keskin, A., Hodapp, S., Chan, L. Y., Weis, K., et al. (2019). Small and  
1371 Large Ribosomal Subunit Deficiencies Lead to Distinct Gene Expression Signatures that  
1372 Reflect Cellular Growth Rate. *Mol Cell*, 73(1), 36-47 e10.
- 1373 Choessel, V., Bacqueville, D., Rouquette, J., Noaillac-Depeyre, J., Fribourg, S., Cretien, A., et al.  
1374 (2007). Impaired ribosome biogenesis in Diamond-Blackfan anemia. *Blood*, 109(3), 1275-  
1375 1283.
- 1376 Da Costa, L., Narla, A., & Mohandas, N. (2018). An update on the pathogenesis and diagnosis of  
1377 Diamond-Blackfan anemia. *F1000Res*, 7.
- 1378 Danilova, N., & Gazda, H. T. (2015). Ribosomopathies: how a common root can cause a tree of  
1379 pathologies. *Dis Model Mech*, 8(9), 1013-1026.
- 1380 Dever, T. E., & Green, R. (2012). The elongation, termination, and recycling phases of  
1381 translation in eukaryotes. *Cold Spring Harb Perspect Biol*, 4(7), a013706.
- 1382 Draptchinskaia, N., Gustavsson, P., Andersson, B., Pettersson, M., Willig, T. N., Dianzani, I., et al.  
1383 (1999). The gene encoding ribosomal protein S19 is mutated in Diamond-Blackfan  
1384 anaemia. *Nat Genet*, 21(2), 169-175.
- 1385 Ferreira-Cerca, S., Poll, G., Gleizes, P. E., Tschochner, H., & Milkereit, P. (2005). Roles of  
1386 eukaryotic ribosomal proteins in maturation and transport of pre-18S rRNA and  
1387 ribosome function. *Mol Cell*, 20(2), 263-275.
- 1388 Ferreira-Cerca, S., Poll, G., Kuhn, H., Neueder, A., Jakob, S., Tschochner, H., et al. (2007).  
1389 Analysis of the in vivo assembly pathway of eukaryotic 40S ribosomal proteins. *Mol Cell*,  
1390 28(3), 446-457.
- 1391 Francis, M. J., Roche, S., Cho, M. J., Beall, E., Min, B., Panganiban, R. P., et al. (2016). *Drosophila*  
1392 IRBP bZIP heterodimer binds P-element DNA and affects hybrid dysgenesis. *Proc Natl*  
1393 *Acad Sci U S A*, 113(46), 13003-13008.
- 1394 Hanahan, D., & Weinberg, R. A. (2011). Hallmarks of cancer: the next generation. *Cell*, 144(5),  
1395 646-674.
- 1396 Harding, H. P., Zhang, Y., Bertolotti, A., Zeng, H., & Ron, D. (2000). Perk is essential for  
1397 translational regulation and cell survival during the unfolded protein response. *Mol Cell*,  
1398 5(5), 897-904.
- 1399 Harding, H. P., Zhang, Y., & Ron, D. (1999). Protein translation and folding are coupled by an  
1400 endoplasmic-reticulum-resident kinase. *Nature*, 397(6716), 271-274.
- 1401 Harding, H. P., Zhang, Y., Scheuner, D., Chen, J. J., Kaufman, R. J., & Ron, D. (2009). Ppp1r15  
1402 gene knockout reveals an essential role for translation initiation factor 2 alpha  
1403 (eIF2alpha) dephosphorylation in mammalian development. *Proc Natl Acad Sci U S A*,  
1404 106(6), 1832-1837.
- 1405 Heijnen, H. F., van Wijk, R., Pereboom, T. C., Goos, Y. J., Seinen, C. W., van Oirschot, B. A., et al.  
1406 (2014). Ribosomal protein mutations induce autophagy through S6 kinase inhibition of  
1407 the insulin pathway. *PLoS Genet*, 10(5), e1004371.
- 1408 Henras, A. K., Plisson-Chastang, C., O'Donohue, M. F., Chakraborty, A., & Gleizes, P. E. (2015).  
1409 An overview of pre-ribosomal RNA processing in eukaryotes. *Wiley Interdiscip Rev RNA*,  
1410 6(2), 225-242.

- 1411 Hetman, M., & Slomnicki, L. P. (2019). Ribosomal biogenesis as an emerging target of  
1412 neurodevelopmental pathologies. *J Neurochem*, *148*(3), 325-347.
- 1413 Hetz, C. (2012). The unfolded protein response: controlling cell fate decisions under ER stress  
1414 and beyond. *Nat Rev Mol Cell Biol*, *13*(2), 89-102.
- 1415 Hinnebusch, A. G., & Lorsch, J. R. (2012). The mechanism of eukaryotic translation initiation:  
1416 new insights and challenges. *Cold Spring Harb Perspect Biol*, *4*: a011544(10).
- 1417 Hui, M. P., Foley, P. L., & Belasco, J. G. (2014). Messenger RNA degradation in bacterial cells.  
1418 *Annu Rev Genet*, *48*, 537-559.
- 1419 Jackson, R. J., Hellen, C. U., & Pestova, T. V. (2010). The mechanism of eukaryotic translation  
1420 initiation and principles of its regulation. *Nat Rev Mol Cell Biol*, *11*(2), 113-127.
- 1421 Ji, Z., Chuen, J., Kiparaki, M., & Baker, N. (2021). Cell competition removes segmental aneuploid  
1422 cells from *Drosophila* imaginal disc-derived tissues based on ribosomal protein gene  
1423 dose. *Elife*, *10*.
- 1424 Ji, Z., Kiparaki, M., Folgado, V., Kumar, A., Blanco, J., Rimesso, G., et al. (2019). *Drosophila* RpS12  
1425 controls translation, growth, and cell competition through Xrp1. *PLoS Genet*, *15*(12),  
1426 e1008513.
- 1427 Juven-Gershon, T., & Kadonaga, J. T. (2010). Regulation of gene expression via the core  
1428 promoter and the basal transcriptional machinery. *Dev Biol*, *339*(2), 225-229.
- 1429 Kale, A., Ji, Z., Kiparaki, M., Blanco, J., Rimesso, G., Flibotte, S., et al. (2018). Ribosomal Protein  
1430 S12e Has a Distinct Function in Cell Competition. *Dev Cell*, *44*(1), 42-55 e44.
- 1431 Kale, A., Li, W., Lee, C. H., & Baker, N. E. (2015). Apoptotic mechanisms during competition of  
1432 ribosomal protein mutant cells: roles of the initiator caspases Dronc and Dream/Strica.  
1433 *Cell Death Differ*, *22*(8), 1300-1312.
- 1434 Kampen, K. R., Sulima, S. O., Vereecke, S., & De Keersmaecker, K. (2020). Hallmarks of  
1435 ribosomopathies. *Nucleic Acids Res*, *48*(3), 1013-1028.
- 1436 Khajuria, R. K., Munschauer, M., Ulirsch, J. C., Fiorini, C., Ludwig, L. S., McFarland, S. K., et al.  
1437 (2018). Ribosome Levels Selectively Regulate Translation and Lineage Commitment in  
1438 Human Hematopoiesis. *Cell*, *173*(1), 90-103 e119.
- 1439 Knutson, B. A., & Hahn, S. (2011). Yeast Rrn7 and human TAF1B are TFIIB-related RNA  
1440 polymerase I general transcription factors. *Science*, *333*(6049), 1637-1640.
- 1441 Kucinski, I., Dinan, M., Kolahgar, G., & Piddini, E. (2017). Chronic activation of JNK/JAK/STAT and  
1442 oxidative stress signalling causes the loser cell status. *Nat Commun*, *8*(1), 136.
- 1443 Lambertsson, A. (1998). The *Minute* genes in *Drosophila* and their molecular functions.  
1444 *Advances in Genetics*, *38*, 69-134.
- 1445 Laplante, M., & Sabatini, D. M. (2012). mTOR signaling in growth control and disease. *Cell*,  
1446 *149*(2), 274-293.
- 1447 Lawlor, K., Perez-Montero, S., Lima, A., & Rodriguez, T. A. (2019). Transcriptional versus  
1448 metabolic control of cell fitness during cell competition. *Semin Cancer Biol*,  
1449 <https://doi.org/10.1016/j.semcancer.2019.05.010>.
- 1450 Lee, C. H., Kiparaki, M., Blanco, J., Folgado, V., Ji, Z., Kumar, A., et al. (2018). A Regulatory  
1451 Response to Ribosomal Protein Mutations Controls Translation, Growth, and Cell  
1452 Competition. *Dev Cell*, *46*(4), 456-469 e454.

- 1453 Lerner, E. A., Lerner, M. R., Janeway, C. A., Jr., & Steitz, J. A. (1981). Monoclonal antibodies to  
1454 nucleic acid-containing cellular constituents: probes for molecular biology and  
1455 autoimmune disease. *Proc Natl Acad Sci U S A*, *78*(5), 2737-2741.
- 1456 Lin, J. H., Li, H., Yasumura, D., Cohen, H. R., Zhang, C., Panning, B., et al. (2007). IRE1 signaling  
1457 affects cell fate during the unfolded protein response. *Science*, *318*(5852), 944-949.
- 1458 Long, E. O., & Dawid, I. B. (1980). Alternative pathways in the processing of ribosomal RNA  
1459 precursor in *Drosophila melanogaster*. *J Mol Biol*, *138*(4), 873-878.
- 1460 Lopez-Otin, C., Blasco, M. A., Partridge, L., Serrano, M., & Kroemer, G. (2013). The hallmarks of  
1461 aging. *Cell*, *153*(6), 1194-1217.
- 1462 Malzer, E., Szajewska-Skuta, M., Dalton, L. E., Thomas, S. E., Hu, N., Skaer, H., et al. (2013).  
1463 Coordinate regulation of eIF2alpha phosphorylation by PPP1R15 and GCN2 is required  
1464 during *Drosophila* development. *J Cell Sci*, *126*(Pt 6), 1406-1415.
- 1465 Marques-Reis, M., & Moreno, E. (2021). Role of cell competition in ageing. *Dev Biol*.
- 1466 Marygold, S. J., Roote, J., Reuter, G., Lambertsson, A., Ashburner, M., Millburn, G. H., et al.  
1467 (2007). The ribosomal protein genes and Minute loci of *Drosophila melanogaster*.  
1468 *Genome Biol*, *8*(10), R216.
- 1469 McCoy, R. C. (2017). Mosaicism in Preimplantation Human Embryos: When Chromosomal  
1470 Abnormalities Are the Norm. *Trends Genet*, *33*(7), 448-463.
- 1471 McNamee, L. M., & Brodsky, M. H. (2009). p53-independent apoptosis limits DNA damage-  
1472 induced aneuploidy. *Genetics*, *182*(2), 423-435.
- 1473 Mills, E. W., & Green, R. (2017). Ribosomopathies: There's strength in numbers. *Science*,  
1474 *358*(6363).
- 1475 Mitra, S., & Ryoo, H. D. (2019). The unfolded protein response in metazoan development. *J Cell*  
1476 *Sci*, *132*(5).
- 1477 Morata, G. (2021). Cell competition: A historical perspective. *Dev Biol*, *476*, 33-40.
- 1478 Morata, G., & Ripoll, P. (1975). Minutes: mutants of *Drosophila* autonomously affecting cell  
1479 division rate. *Developmental Biology*, *42*, 211-221.
- 1480 Nagata, R., Nakamura, M., Sanaki, Y., & Igaki, T. (2019). Cell Competition Is Driven by  
1481 Autophagy. *Dev Cell*, *51*(1), 99-112 e114.
- 1482 Ohler, U., Liao, G. C., Niemann, H., & Rubin, G. M. (2002). Computational analysis of core  
1483 promoters in the *Drosophila* genome. *Genome Biol*, *3*(12), RESEARCH0087.
- 1484 Oliver, E. R., Saunders, T. L., Tarle, S. A., & Glaser, T. (2004). Ribosomal protein L24 defect in  
1485 belly spot and tail (*Bst*), a mouse Minute. *Development*, *131*, 3907-3920.
- 1486 Pakos-Zebrucka, K., Koryga, I., Mnich, K., Ljujic, M., Samali, A., & Gorman, A. M. (2016). The  
1487 integrated stress response. *EMBO Rep*, *17*(10), 1374-1395.
- 1488 Pelava, A., Schneider, C., & Watkins, N. J. (2016). The importance of ribosome production, and  
1489 the 5S RNP-MDM2 pathway, in health and disease. *Biochem Soc Trans*, *44*(4), 1086-  
1490 1090.
- 1491 Poll, G., Braun, T., Jakovljevic, J., Neueder, A., Jakob, S., Woolford, J. L., Jr., et al. (2009). rRNA  
1492 maturation in yeast cells depleted of large ribosomal subunit proteins. *PLoS One*, *4*(12),  
1493 e8249.
- 1494 Recasens-Alvarez, C., Alexandre, C., Kirkpatrick, J., Nojima, H., Huels, D. J., Snijders, A. P., et al.  
1495 (2021). Ribosomopathy-associated mutations cause proteotoxic stress that is alleviated  
1496 by TOR inhibition. *Nat Cell Biol*, *23*(2), 127-135.



- 1497 Romero-Pozuelo, J., Demetriades, C., Schroeder, P., & Teleman, A. A. (2017). CycD/Cdk4 and  
1498 Discontinuities in Dpp Signaling Activate TORC1 in the Drosophila Wing Disc. *Dev Cell*,  
1499 42(4), 376-387 e375.
- 1500 Ron, D., & Walter, P. (2007). Signal integration in the endoplasmic reticulum unfolded protein  
1501 response. *Nat Rev Mol Cell Biol*, 8(7), 519-529.
- 1502 Saini, P., Eyler, D. E., Green, R., & Dever, T. E. (2009). Hypusine-containing protein eIF5A  
1503 promotes translation elongation. *Nature*, 459(7243), 118-121.
- 1504 Schuller, A. P., Wu, C. C., Dever, T. E., Buskirk, A. R., & Green, R. (2017). eIF5A Functions  
1505 Globally in Translation Elongation and Termination. *Mol Cell*, 66(2), 194-205 e195.
- 1506 Shi, Y., Vattem, K. M., Sood, R., An, J., Liang, J., Stramm, L., et al. (1998). Identification and  
1507 characterization of pancreatic eukaryotic initiation factor 2 alpha-subunit kinase, PEK,  
1508 involved in translational control. *Mol Cell Biol*, 18(12), 7499-7509.
- 1509 Simpson, P. (1979). Parameters of cell competition in the compartments of the wing disc of  
1510 *Drosophila*. *Developmental Biology*, 69, 182-193.
- 1511 Solanki, N. R., Stadanlick, J. E., Zhang, Y., Duc, A. C., Lee, S. Y., Lauritsen, J. P., et al. (2016). Rpl22  
1512 Loss Selectively Impairs alphabeta T Cell Development by Dysregulating Endoplasmic  
1513 Reticulum Stress Signaling. *J Immunol*, 197(6), 2280-2289.
- 1514 Sollner-Webb, B., & Tower, J. (1986). Transcription of cloned eukaryotic ribosomal RNA genes.  
1515 *Annu Rev Biochem*, 55, 801-830.
- 1516 Sone, M., Zeng, X., Larese, J., & Ryoo, H. D. (2013). A modified UPR stress sensing system  
1517 reveals a novel tissue distribution of IRE1/XBP1 activity during normal Drosophila  
1518 development. *Cell Stress Chaperones*, 18(3), 307-319.
- 1519 Sykiotis, G. P., & Bohmann, D. (2008). Keap1/Nrf2 signaling regulates oxidative stress tolerance  
1520 and lifespan in Drosophila. *Dev Cell*, 14(1), 76-85.
- 1521 Thomson, E., Ferreira-Cerca, S., & Hurt, E. (2013). Eukaryotic ribosome biogenesis at a glance. *J*  
1522 *Cell Sci*, 126(Pt 21), 4815-4821.
- 1523 Tiu, G. C., Tiu, G., Tiu, G., Tiu, G., Tiu, G., Tiu, G., et al. (2020). A p53-dependent translational  
1524 program directs tissue-selective phenotypes in a model of ribosomopathies. *bioRxiv*,  
1525 <https://doi.org/10.1101/2020.06.24.167940>.
- 1526 Trainor, P. A., Dixon, J., & Dixon, M. J. (2009). Treacher Collins syndrome: etiology, pathogenesis  
1527 and prevention. *Eur J Hum Genet*, 17(3), 275-283.
- 1528 Tsukada, J., Yoshida, Y., Kominato, Y., & Auron, P. E. (2011). The CCAAT/enhancer (C/EBP) family  
1529 of basic-leucine zipper (bZIP) transcription factors is a multifaceted highly-regulated  
1530 system for gene regulation. *Cytokine*, 54(1), 6-19.
- 1531 Tye, B. W., Commins, N., Ryazanova, L. V., Wuhr, M., Springer, M., Pincus, D., et al. (2019).  
1532 Proteotoxicity from aberrant ribosome biogenesis compromises cell fitness. *Elife*, 8.
- 1533 Vishwakarma, M., & Piddini, E. (2020). Outcompeting cancer. *Nat Rev Cancer*, 20(3), 187-198.
- 1534 Walter, P., & Ron, D. (2011). The unfolded protein response: from stress pathway to  
1535 homeostatic regulation. *Science*, 334(6059), 1081-1086.
- 1536 Warren, A. J. (2018). Molecular basis of the human ribosomopathy Shwachman-Diamond  
1537 syndrome. *Adv Biol Regul*, 67, 109-127.
- 1538 Woolford, J. L., Jr., & Baserga, S. J. (2013). Ribosome biogenesis in the yeast *Saccharomyces*  
1539 *cerevisiae*. *Genetics*, 195(3), 643-681.

- 1540 Yarchuk, O., Jacques, N., Guillerez, J., & Dreyfus, M. (1992). Interdependence of translation,  
1541 transcription and mRNA degradation in the lacZ gene. *J Mol Biol*, 226(3), 581-596.
- 1542 Zhu, L. J., Christensen, R. G., Kazemian, M., Hull, C. J., Enuameh, M. S., Basciotta, M. D., et al.  
1543 (2011). FlyFactorSurvey: a database of Drosophila transcription factor binding  
1544 specificities determined using the bacterial one-hybrid system. *Nucleic Acids Res*,  
1545 39(Database issue), D111-117.
- 1546 Zielke, N., Vaharautio, A., Liu, J., & Taipale, J. Myc-dependent cell competition and proliferative  
1547 response requires induction of the ribosome biogenesis regulator Peter Pan. *bioRxiv*.  
1548
